# Supplementary material for: Archaeometric Analysis of Encrustations Adhering to Pietra Ollare Fragments from the Medieval Village of Nogara
Source: MDPI journal article supplement (doi:10.3390/heritage6040178), 2023-03-23
Supplement: s1 [file s1]

Archive with 3 entries (3 files):
- heritage-2281691-supplementary Data S1- Encrustations SEM data.pdf
- heritage-2281691-supplementary Data S2- Encrustations vs Pietra Ollare SEM data.pdf
- heritage-2281691-supplementary Data S3- Pollen Extraction Procedure.pdf
