# Supplementary material for: Archaeometric Analysis of Encrustations Adhering to Pietra Ollare Fragments from the Medieval Village of Nogara
Source: MDPI journal article supplement (doi:10.3390/heritage6040178), 2023-03-23
Supplement: s1 [file s1]

## SAMPLE 2

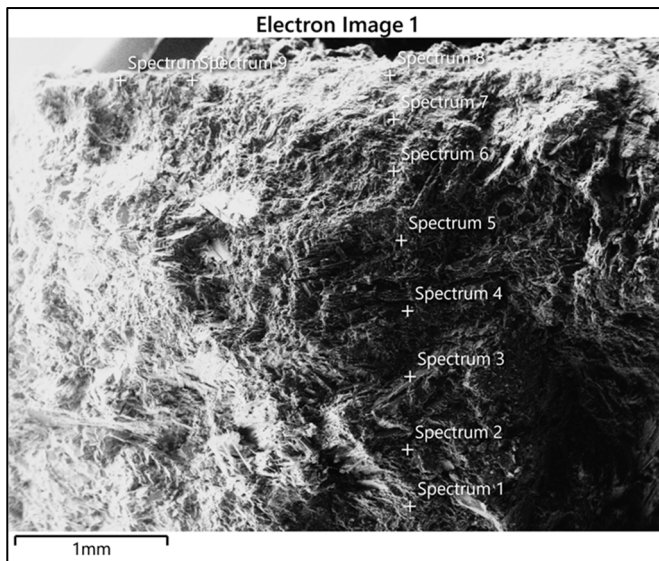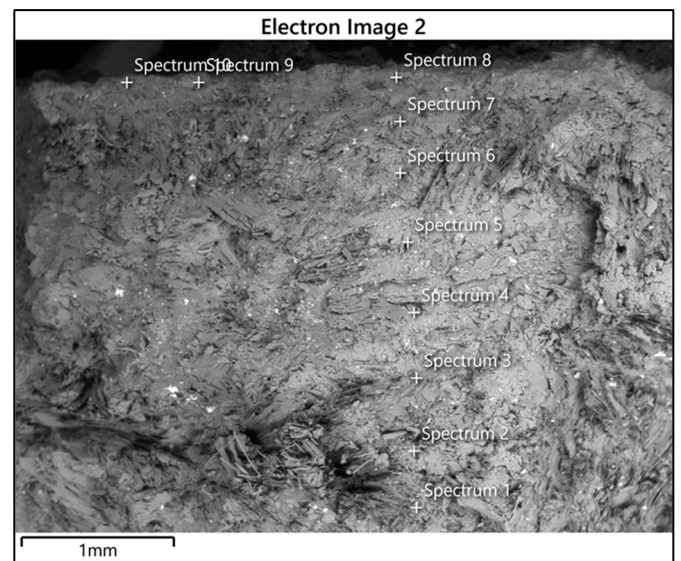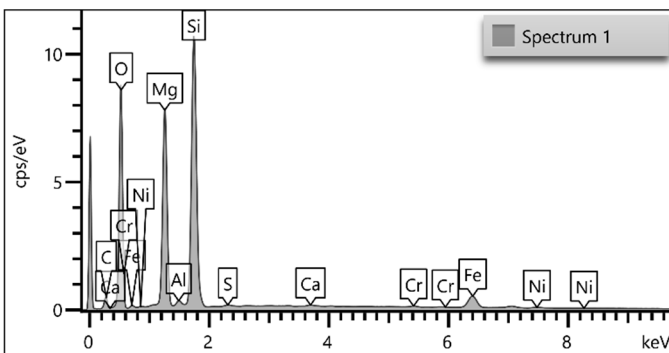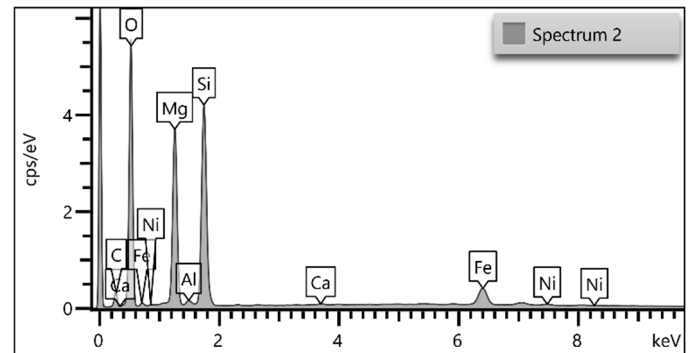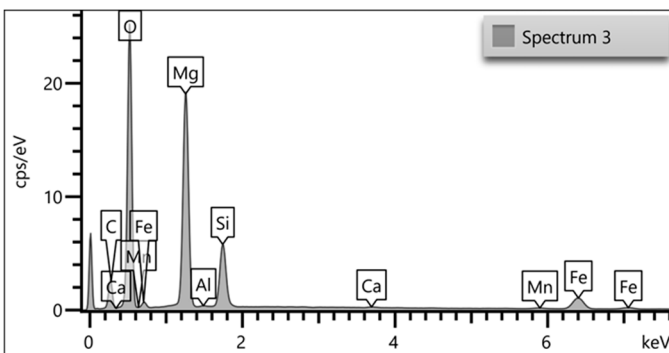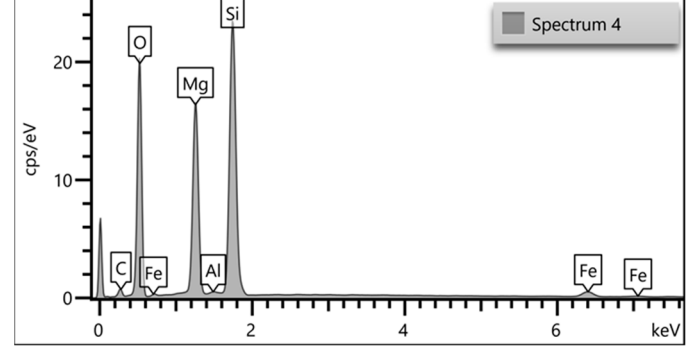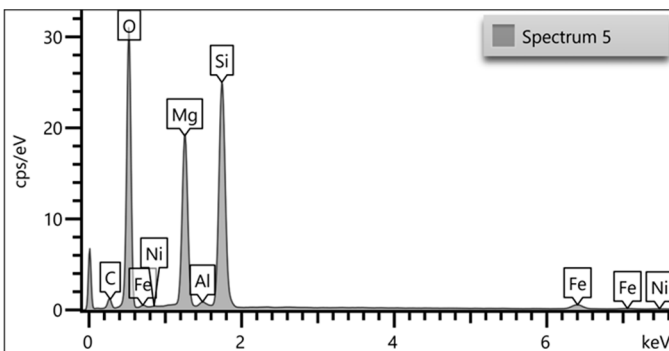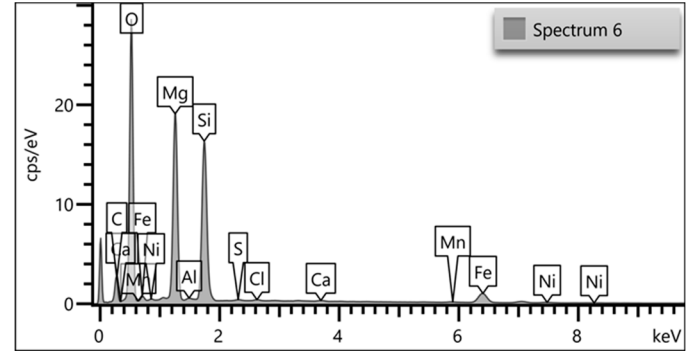

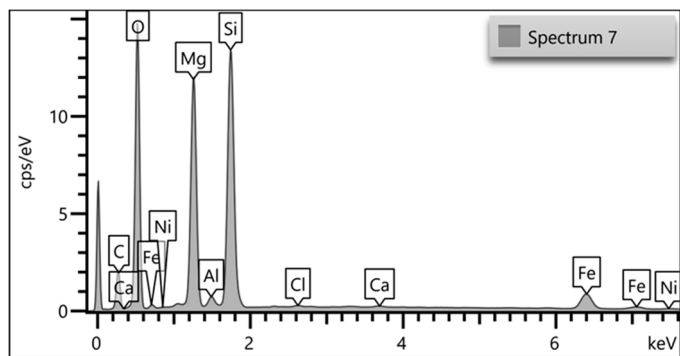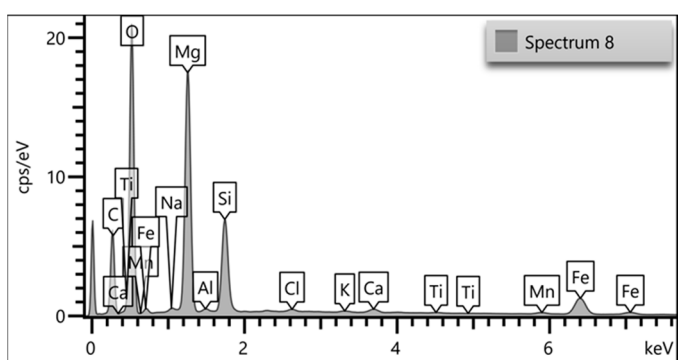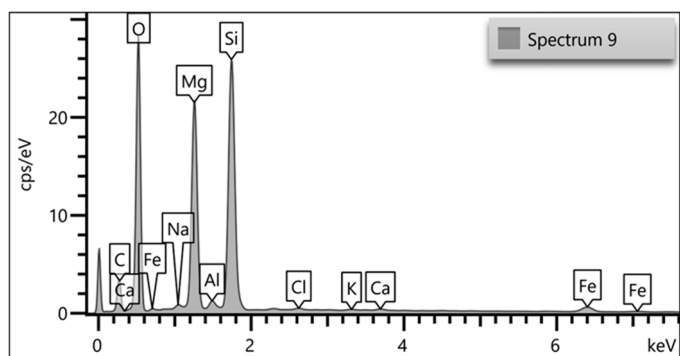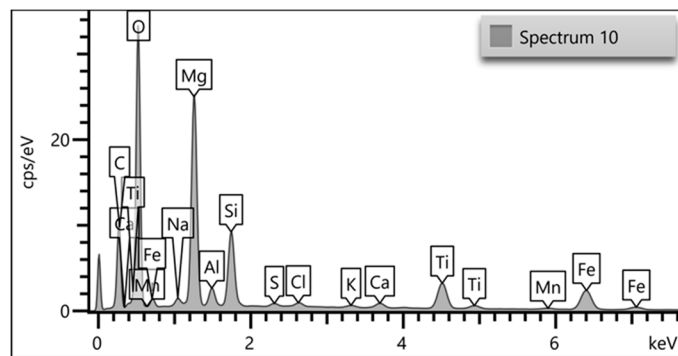

| Wt%         | C     | O     | Na   | Mg    | Al   | Si    | S    | Cl   | K    | Ca   | Ti   | Cr   | Mn   | Fe   | Ni   | Total |
|-------------|-------|-------|------|-------|------|-------|------|------|------|------|------|------|------|------|------|-------|
| Spectrum 1  | 10,27 | 42,59 |      | 16,99 | 0,45 | 23,53 | 0,11 |      |      | 0,16 |      | 0,34 |      | 5,12 | 0,45 | 100   |
| Spectrum 2  | 11,53 | 46,51 |      | 15,99 | 0,4  | 17,6  |      |      |      | 0,16 |      |      |      | 7,1  | 0,71 | 100   |
| Spectrum 3  | 17,36 | 50,68 |      | 20,35 | 0,1  | 6,06  |      |      |      | 0,13 |      |      | 0,26 | 5,05 |      | 100   |
| Spectrum 4  | 7,97  | 46,91 |      | 17,16 | 0,16 | 25,45 |      |      |      |      |      |      |      | 2,35 |      | 100   |
| Spectrum 5  | 9,05  | 51,61 |      | 15,91 | 0,38 | 20,96 |      |      |      |      |      |      |      | 1,89 | 0,2  | 100   |
| Spectrum 6  | 16,07 | 49,57 |      | 16,09 | 0,15 | 13,45 | 0,09 | 0,11 |      | 0,13 |      |      | 0,15 | 3,91 | 0,27 | 100   |
| Spectrum 7  | 20,05 | 43,41 |      | 14,57 | 0,63 | 16,05 |      | 0,11 |      | 0,12 |      |      |      | 4,79 | 0,25 | 100   |
| Spectrum 8  | 29,62 | 44,03 | 0,23 | 14,62 | 0,17 | 5,44  |      | 0,16 | 0,1  | 0,33 | 0,09 |      | 0,38 | 4,83 |      | 100   |
| Spectrum 9  | 0,45  | 49,84 | 0,44 | 19,87 | 0,8  | 25,62 |      | 0,21 | 0,14 | 0,27 |      |      |      | 2,36 |      | 100   |
| Spectrum 10 | 0,78  | 50,51 | 0,88 | 21,54 | 2,03 | 7,62  | 0,31 | 0,4  | 0,27 | 0,7  | 5,85 |      | 0,36 | 8,76 |      | 100   |

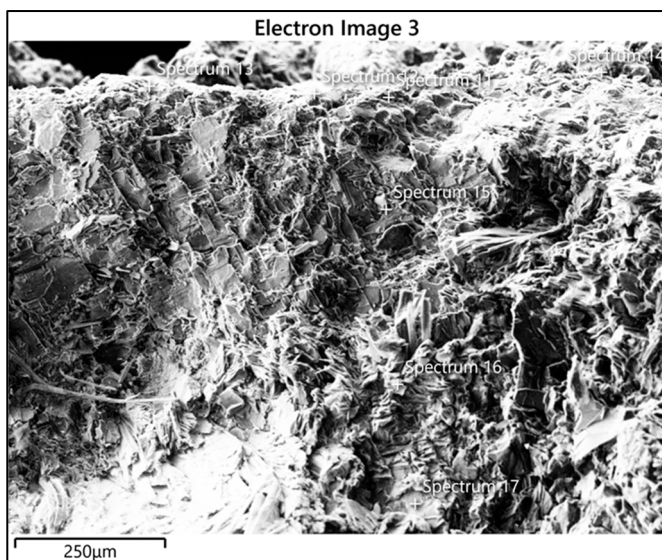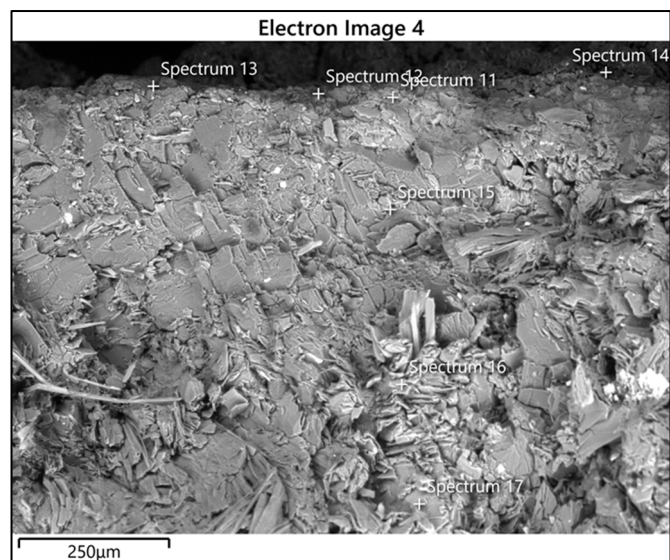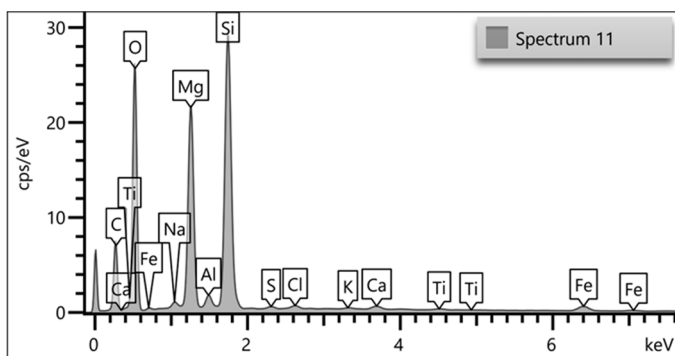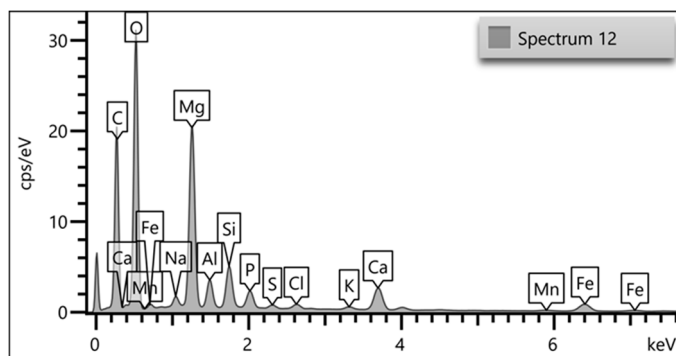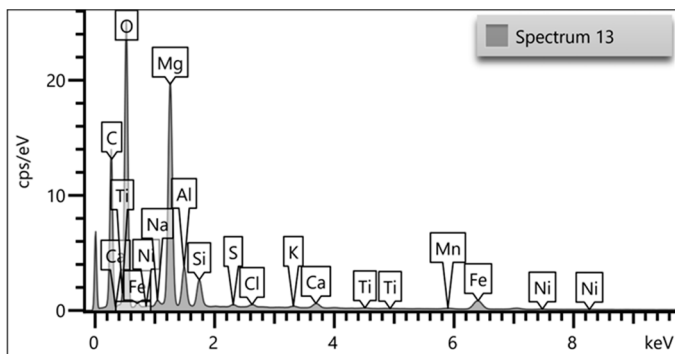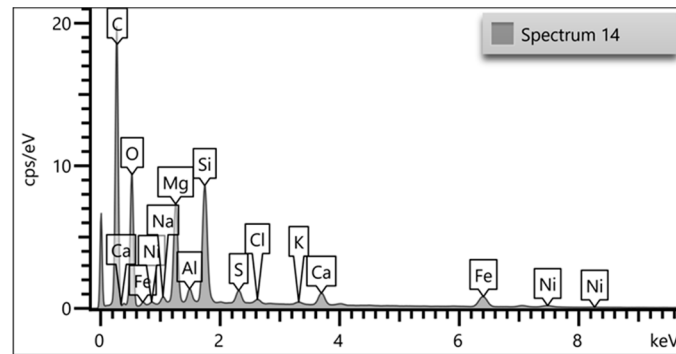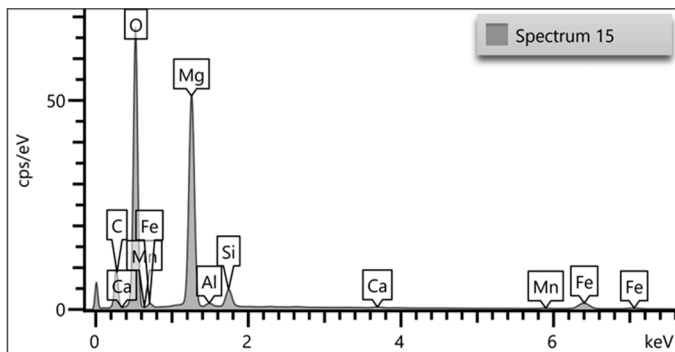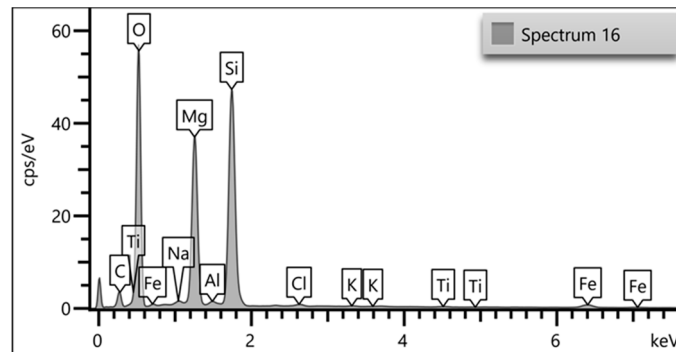

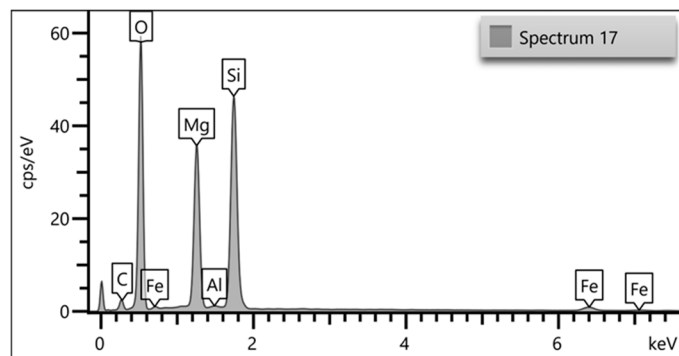

| Wt%         | C     | O     | Na   | Mg    | Al   | Si    | P    | S    | Cl   | K    | Ca   | Ti   | Mn   | Fe   | Ni   | Total |
|-------------|-------|-------|------|-------|------|-------|------|------|------|------|------|------|------|------|------|-------|
| Spectrum 11 | 1     | 47,46 | 0,62 | 18,67 | 1,28 | 27,06 |      | 0,3  | 0,39 | 0,18 | 0,52 | 0,24 |      | 2,27 |      | 100   |
| Spectrum 12 | 1,97  | 55    | 1,49 | 20,75 | 3,76 | 5,01  | 2,32 | 0,47 | 0,63 | 0,42 | 4,18 |      | 0,26 | 3,73 |      | 100   |
| Spectrum 13 | 1,96  | 52,46 | 0,85 | 27,16 | 6,11 | 3,82  |      | 0,33 | 0,38 | 0,29 | 0,94 | 0,16 | 0,32 | 4,94 | 0,3  | 100   |
| Spectrum 14 | 5,08  | 43,27 | 1,32 | 15,18 | 2,15 | 17,47 |      | 2,29 | 0,78 | 0,5  | 3,09 |      |      | 7,47 | 1,41 | 100   |
| Spectrum 15 | 20,74 | 53,19 |      | 20,88 | 0,36 | 1,75  |      |      |      |      | 0,14 |      | 0,21 | 2,73 |      | 100   |
| Spectrum 16 | 13,3  | 50,42 | 0,3  | 14,94 | 0,27 | 19,13 |      |      | 0,2  | 0,09 |      | 0,12 |      | 1,25 |      | 100   |
| Spectrum 17 | 9,73  | 52,36 |      | 15,68 | 0,13 | 20,44 |      |      |      |      |      |      |      | 1,66 |      | 100   |



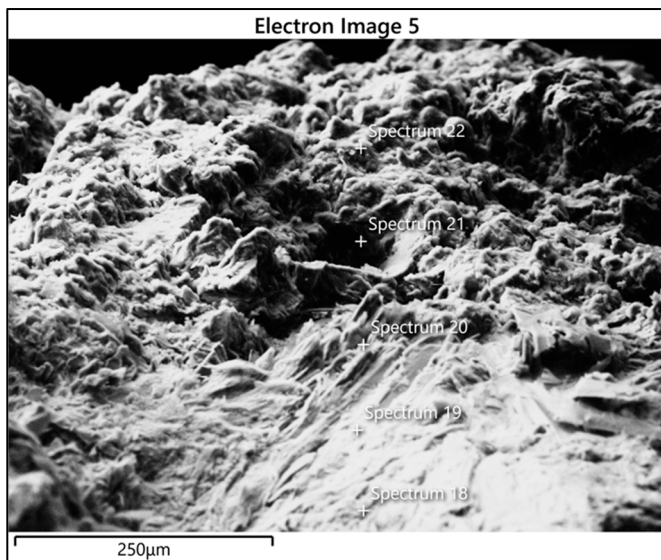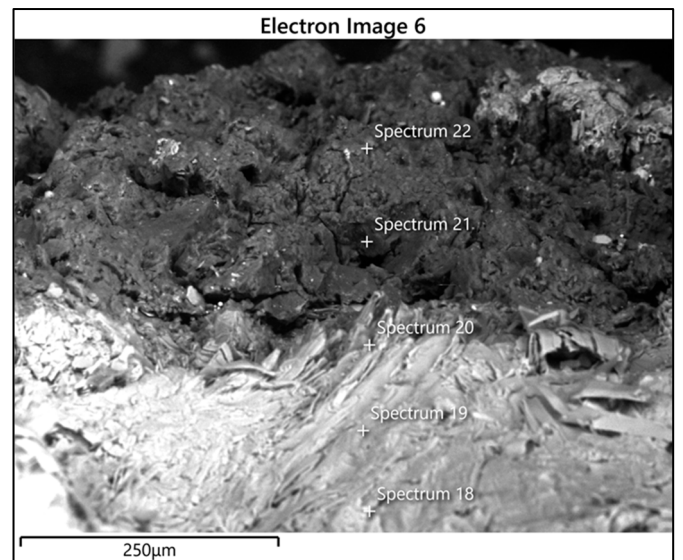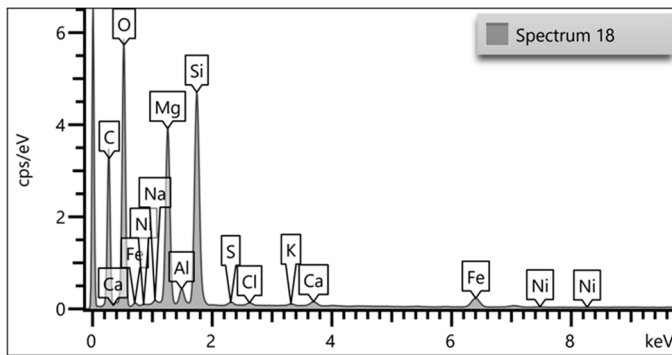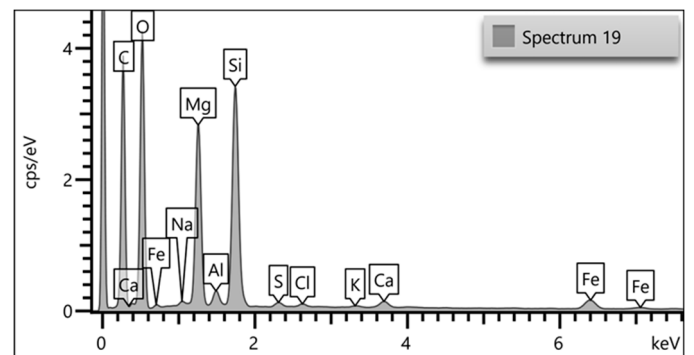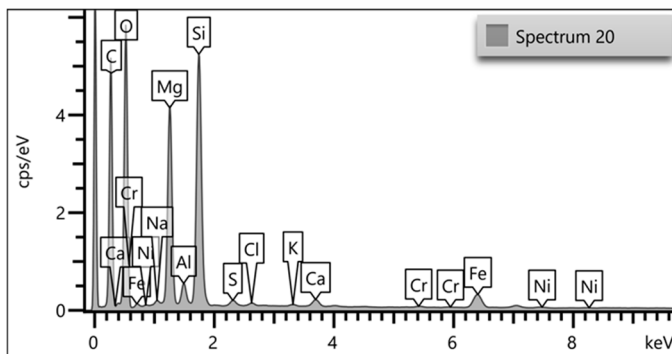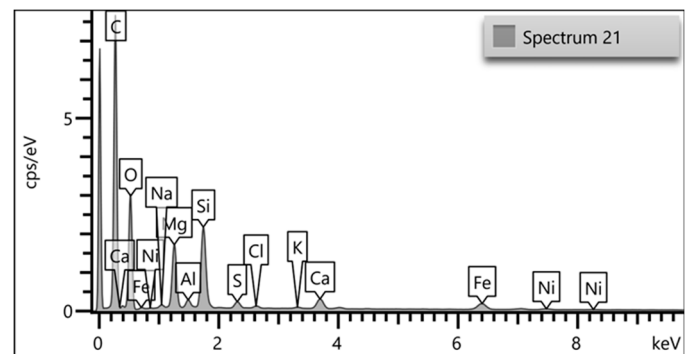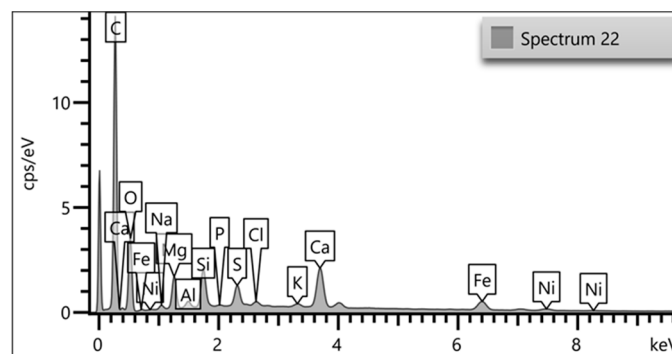

| Wt%      | C    | O    | Na   | Mg    | Al   | Si    | P | S   | Cl   | K    | Ca   | Cr | Fe   | Ni   | Total |
|----------|------|------|------|-------|------|-------|---|-----|------|------|------|----|------|------|-------|
| Spectrum |      |      |      |       |      |       |   |     |      |      |      |    |      |      |       |
| 18       | 2,07 | 49,5 | 0,41 | 17,73 | 1,69 | 21,96 |   | 0,4 | 0,34 | 0,28 | 0,74 |    | 4,53 | 0,34 | 100   |

|             |       |       |      |       |      |       |      |      |      |      |       |      |      |      |     |
|-------------|-------|-------|------|-------|------|-------|------|------|------|------|-------|------|------|------|-----|
| Spectrum 19 | 46,38 | 36,61 | 0,17 | 6,62  | 0,49 | 7,28  |      | 0,18 | 0,13 | 0,08 | 0,36  |      | 1,71 |      | 100 |
| Spectrum 20 | 2,8   | 46,66 | 0,44 | 17,16 | 1,96 | 22,15 |      | 0,53 | 0,32 | 0,25 | 1,03  | 0,35 | 5,83 | 0,51 | 100 |
| Spectrum 21 | 6,51  | 48,91 | 0,82 | 13,26 | 1,58 | 15,95 |      | 1,57 | 0,58 | 0,41 | 3,37  |      | 5,67 | 1,36 | 100 |
| Spectrum 22 | 5,77  | 45,25 | 1,29 | 7,63  | 1,24 | 7,41  | 0,31 | 4,67 | 1,1  | 0,92 | 13,56 |      | 8,56 | 2,28 | 100 |

## SAMPLE 4

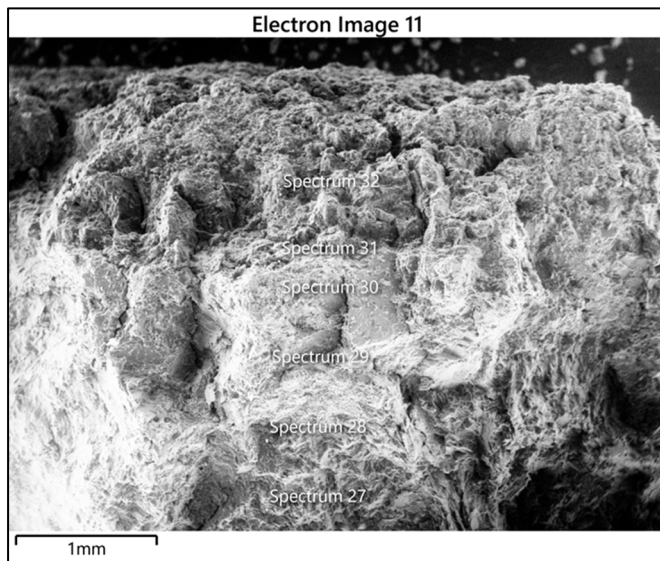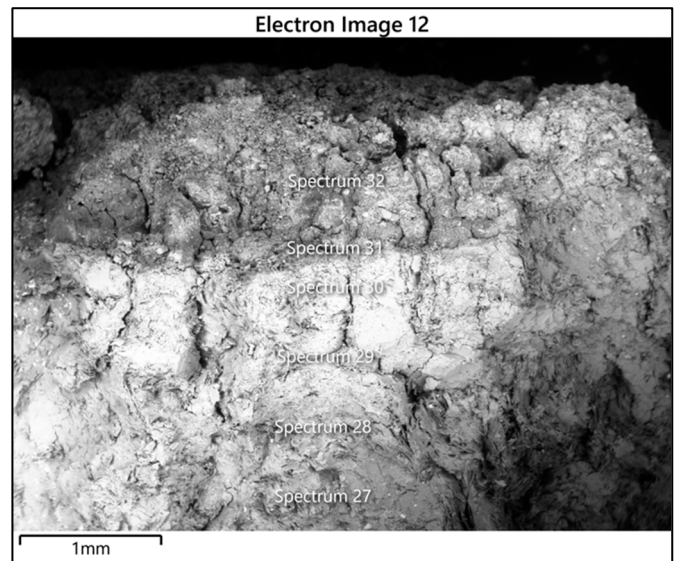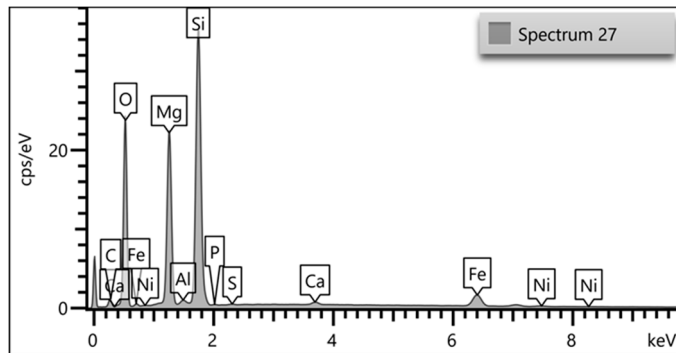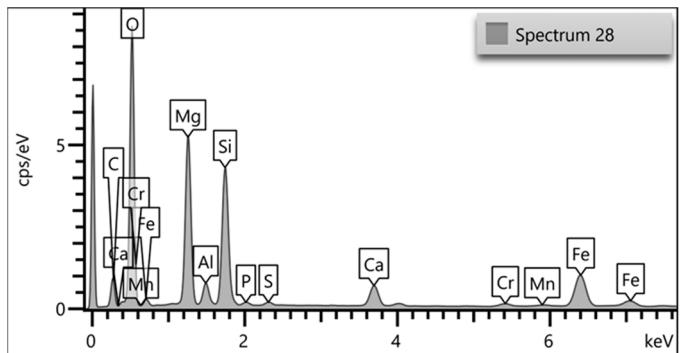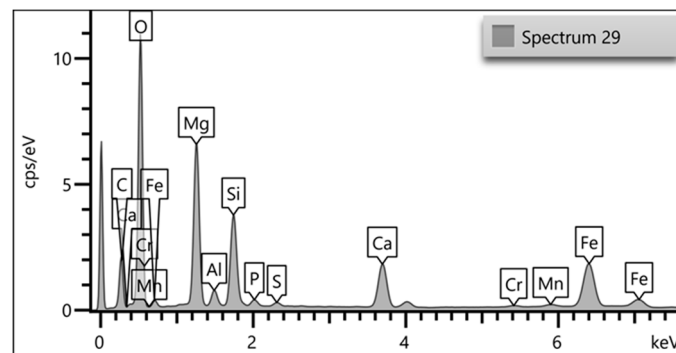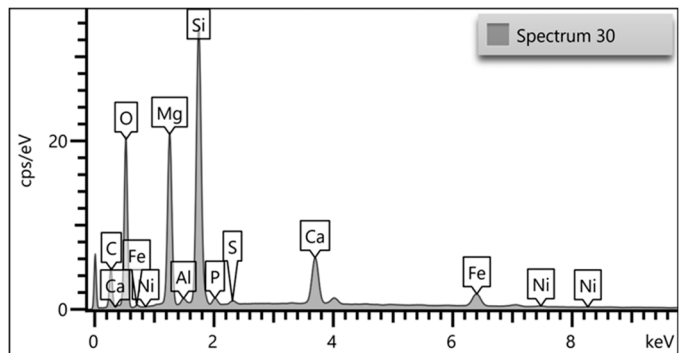

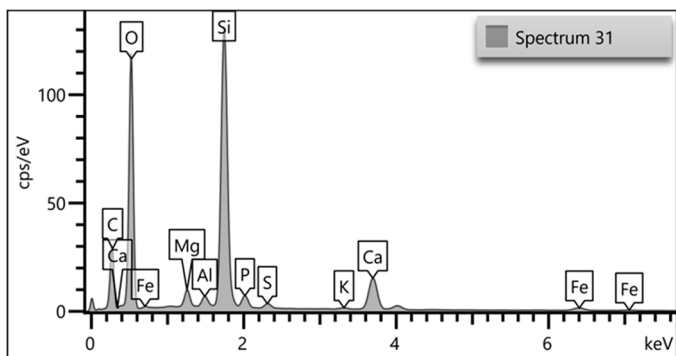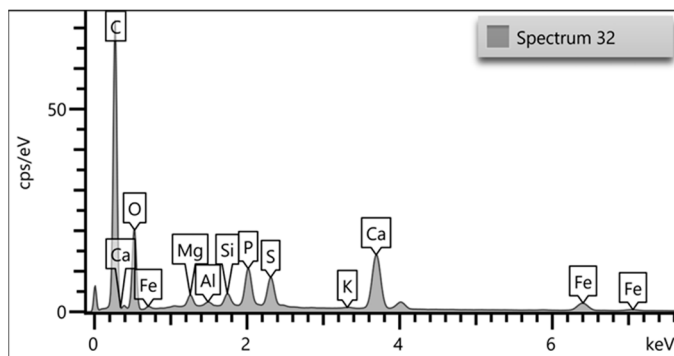

| Wt%         | C     | O     | Mg    | Al   | Si    | P    | S    | K    | Ca   | Cr   | Mn   | Fe    | Ni   | Total |
|-------------|-------|-------|-------|------|-------|------|------|------|------|------|------|-------|------|-------|
| Spectrum 27 | 8,87  | 41,37 | 16,4  | 0,37 | 26,41 | 0,13 | 0,11 |      | 0,44 |      |      | 5,5   | 0,41 | 100   |
| Spectrum 28 | 14,36 | 44,42 | 13,66 | 1,75 | 10,37 | 0,28 | 0,28 |      | 2,53 | 0,58 | 0,23 | 11,53 |      | 100   |
| Spectrum 29 | 18,91 | 42,25 | 11,86 | 1,13 | 5,9   | 0,48 | 0,28 |      | 4,64 | 0,28 | 0,49 | 13,77 |      | 100   |
| Spectrum 30 | 22,09 | 36,99 | 11,62 | 0,38 | 17,8  | 0,64 | 0,27 |      | 5,53 |      |      | 4,25  | 0,44 | 100   |
| Spectrum 31 | 27,62 | 49,45 | 1,1   | 0,57 | 15,47 | 0,92 | 0,36 | 0,13 | 3,55 |      |      | 0,83  |      | 100   |
| Spectrum 32 | 60,86 | 25,46 | 0,68  | 0,2  | 0,6   | 2,22 | 1,83 | 0,08 | 5,71 |      |      | 2,37  |      | 100   |

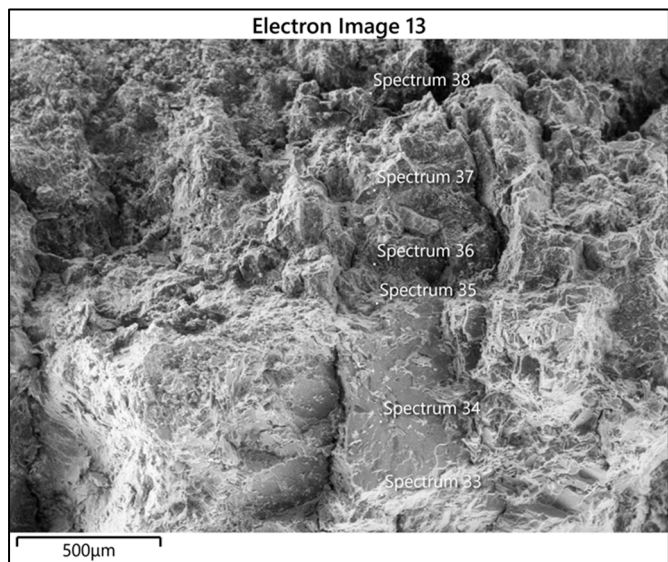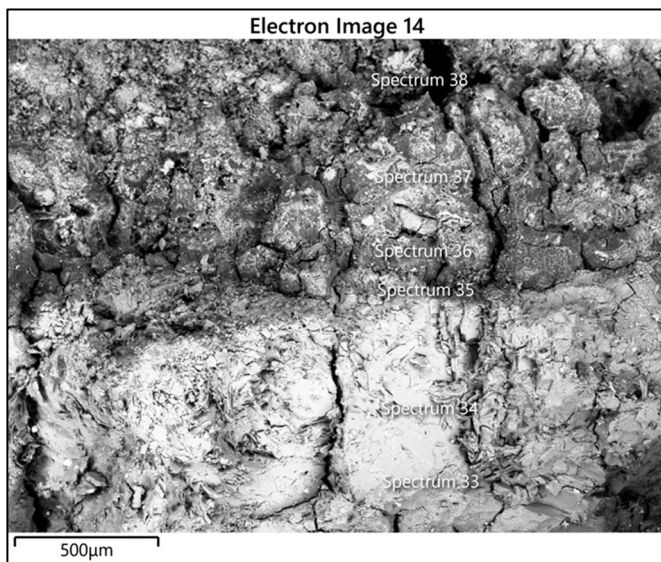



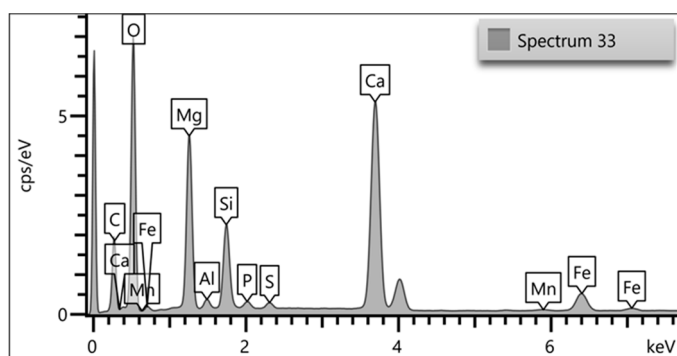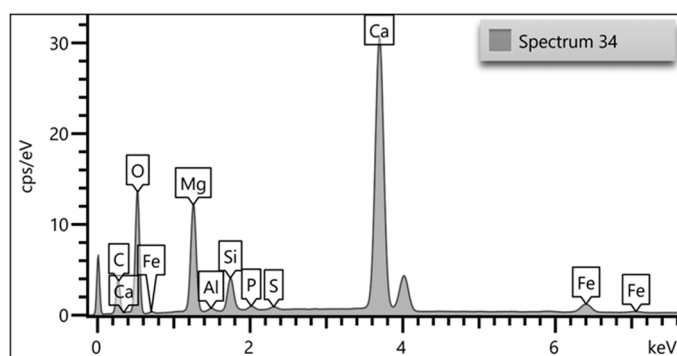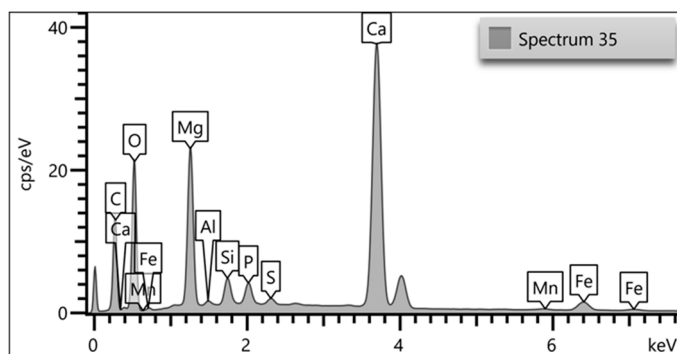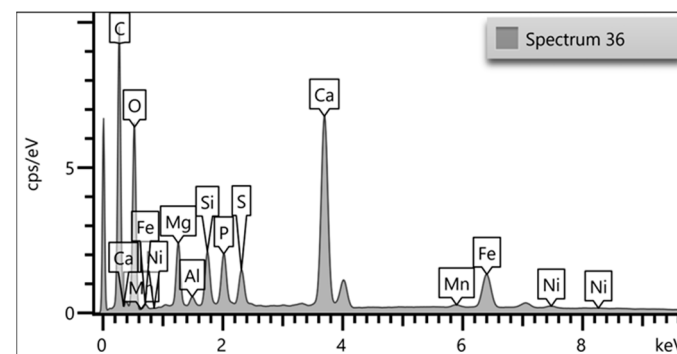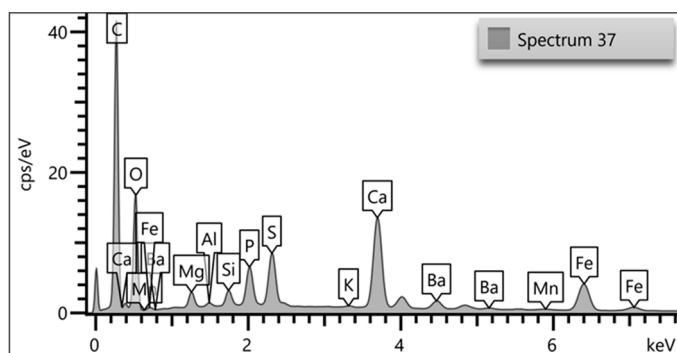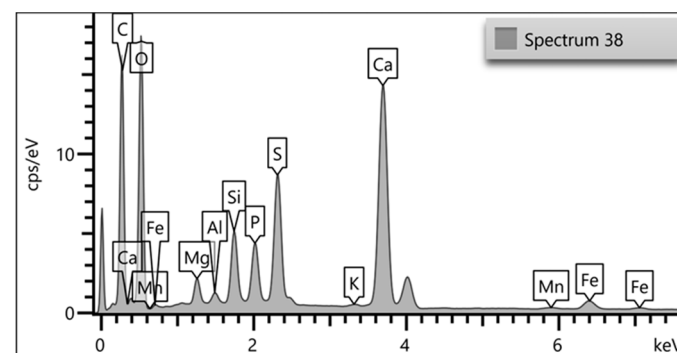

| Wt%         | C     | O     | Mg   | Al   | Si   | P    | S    | K   | Ca    | Mn   | Fe   | Ni   | Ba   | Total |
|-------------|-------|-------|------|------|------|------|------|-----|-------|------|------|------|------|-------|
| Spectrum 33 | 17,02 | 46,96 | 9,34 | 0,48 | 3,9  | 0,35 | 0,32 |     | 17,22 | 0,18 | 4,22 |      |      | 100   |
| Spectrum 34 | 10,55 | 42,27 | 8,74 | 0,24 | 2,23 | 0,3  | 0,2  |     | 32,47 |      | 2,99 |      |      | 100   |
| Spectrum 35 | 22,17 | 38,57 | 9,37 | 0,24 | 1,34 | 1,23 | 0,36 |     | 24,2  | 0,22 | 2,31 |      |      | 100   |
| Spectrum 36 | 41,46 | 31,34 | 2,56 | 0,32 | 1,76 | 1,93 | 1,38 |     | 12,01 | 0,41 | 6,31 | 0,52 |      | 100   |
| Spectrum 37 | 52,45 | 25,26 | 0,76 | 0,16 | 0,63 | 1,79 | 2,54 | 0,1 | 7,13  | 0,13 | 6,41 |      | 2,61 | 100   |
| Spectrum 38 | 38,44 | 38,62 | 0,84 | 0,29 | 1,92 | 1,89 | 4,23 | 0,1 | 12,15 | 0,16 | 1,35 |      |      | 100   |

## SAMPLE 6

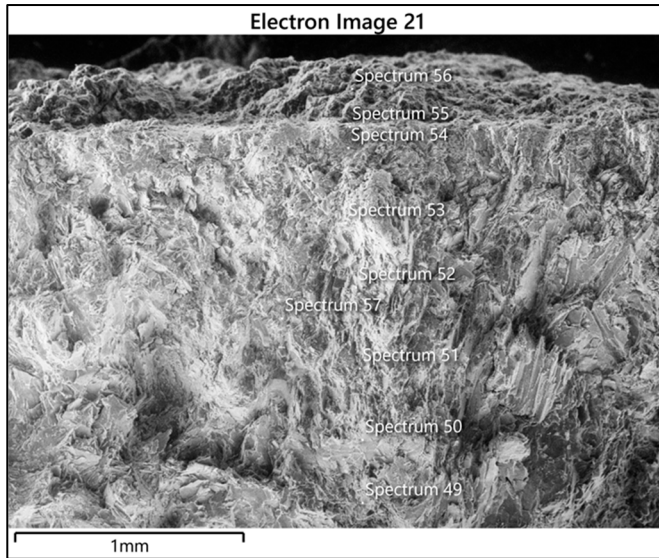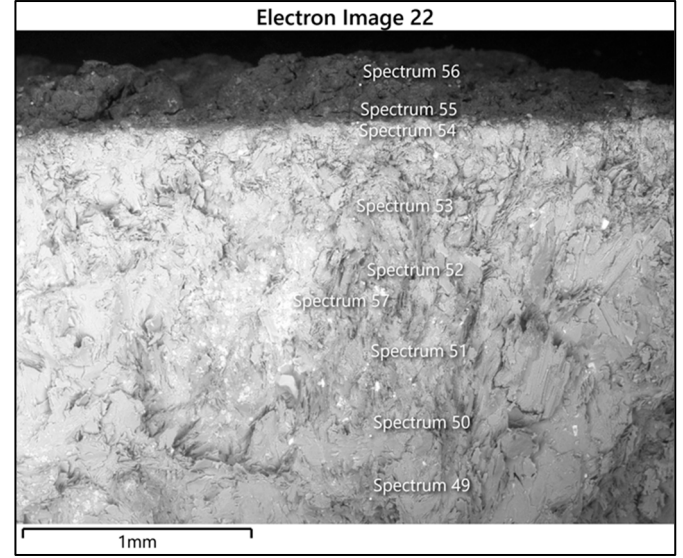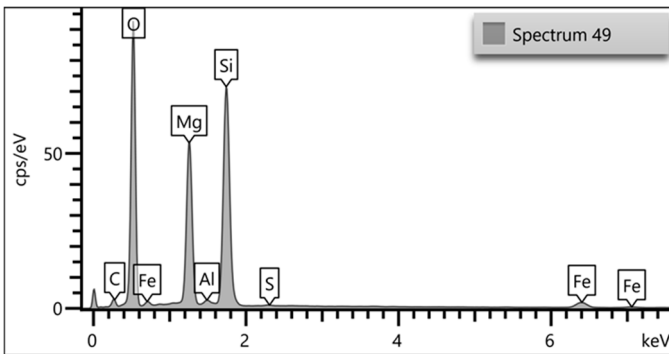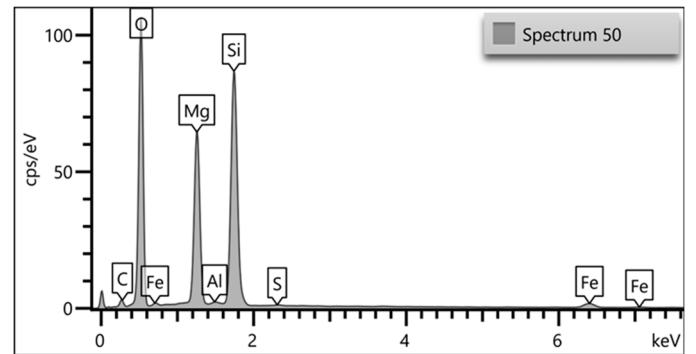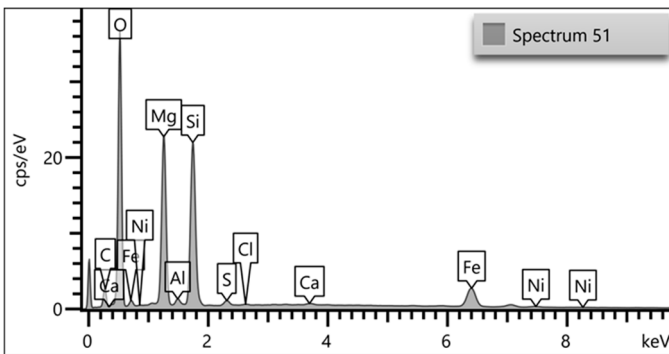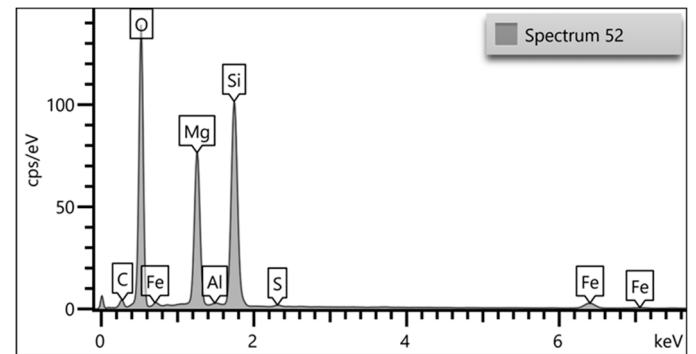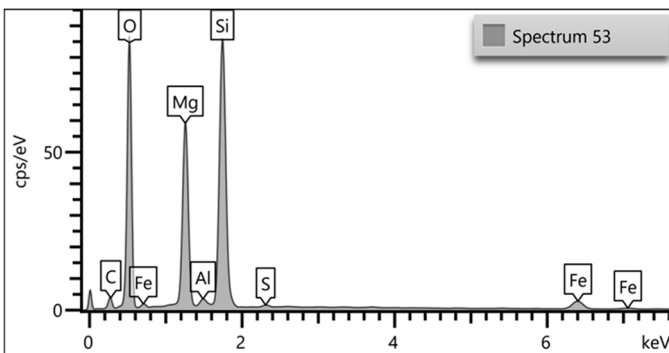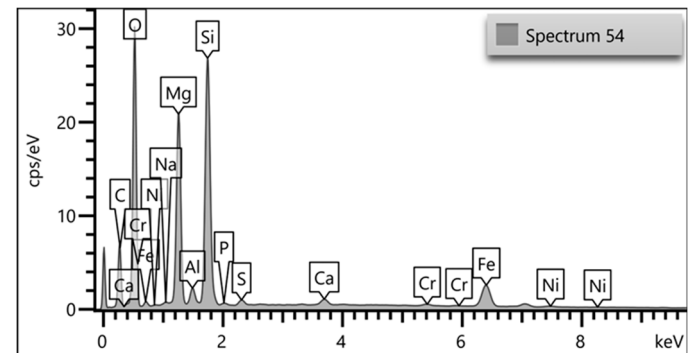

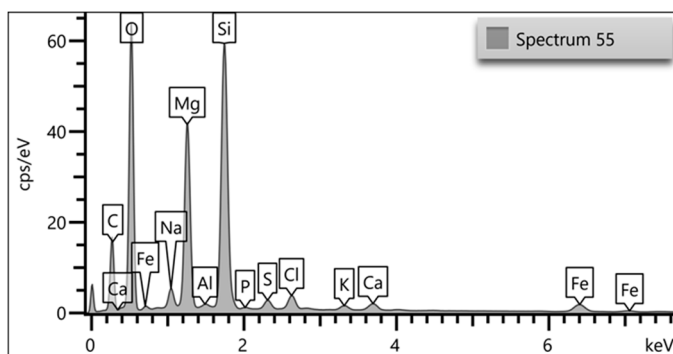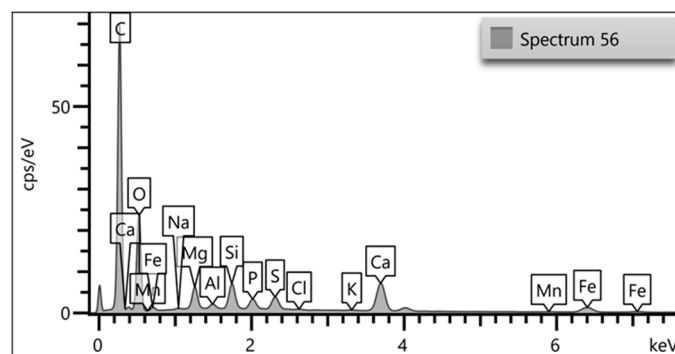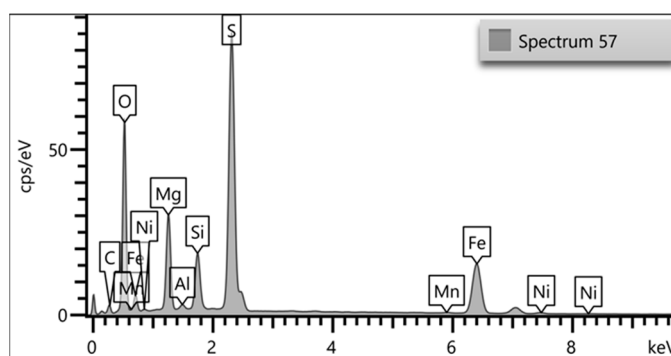

| Wt%         | C     | O     | Na   | Mg    | Al   | Si    | P    | S     | Cl   | K    | Ca   | Cr   | Mn   | Fe    | Ni   | Total |
|-------------|-------|-------|------|-------|------|-------|------|-------|------|------|------|------|------|-------|------|-------|
| Spectrum 49 | 7,38  | 52,59 |      | 15,79 | 0,4  | 21,18 |      | 0,08  |      |      |      |      |      | 2,58  |      | 100   |
| Spectrum 50 | 7,29  | 52,36 |      | 16,18 | 0,18 | 21,93 |      | 0,09  |      |      |      |      |      | 1,97  |      | 100   |
| Spectrum 51 | 13,22 | 47,55 |      | 15,33 | 0,59 | 14,16 |      | 0,51  | 0,1  |      | 0,21 |      |      | 7,85  | 0,46 | 100   |
| Spectrum 52 | 7,4   | 53,45 |      | 15,56 | 0,17 | 20,62 |      | 0,23  |      |      |      |      |      | 2,57  |      | 100   |
| Spectrum 53 | 10,01 | 48,12 |      | 15,31 | 0,58 | 22,39 |      | 0,25  |      |      |      |      |      | 3,34  |      | 100   |
| Spectrum 54 | 25,43 | 41,24 | 0,13 | 11,11 | 0,92 | 13,36 | 0,15 | 0,35  |      |      | 0,53 | 0,29 |      | 6,15  | 0,33 | 100   |
| Spectrum 55 | 28,82 | 42,79 | 1,3  | 9,65  | 0,15 | 12,89 | 0,1  | 0,55  | 0,91 | 0,36 | 0,59 |      |      | 1,89  |      | 100   |
| Spectrum 56 | 59,68 | 30,58 | 0,08 | 1,43  | 0,26 | 1,4   | 0,66 | 0,85  | 0,07 | 0,06 | 3,2  |      | 0,09 | 1,64  |      | 100   |
| Spectrum 57 | 8,55  | 36,29 |      | 8,56  | 0,38 | 4,12  |      | 22,82 |      |      |      |      | 0,21 | 18,43 | 0,64 | 100   |



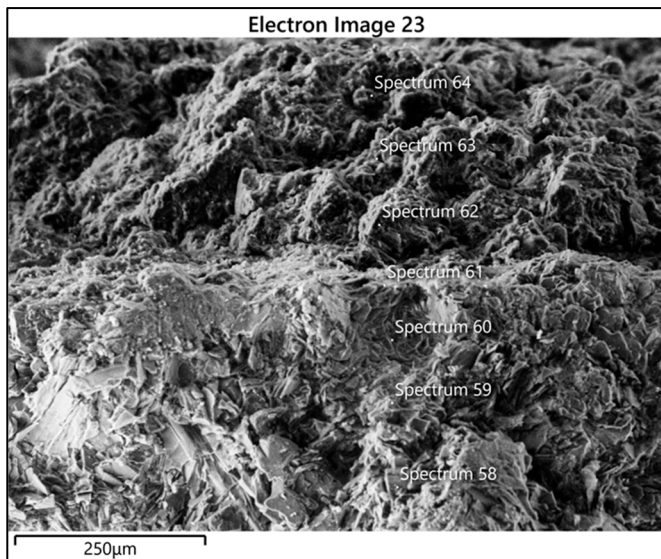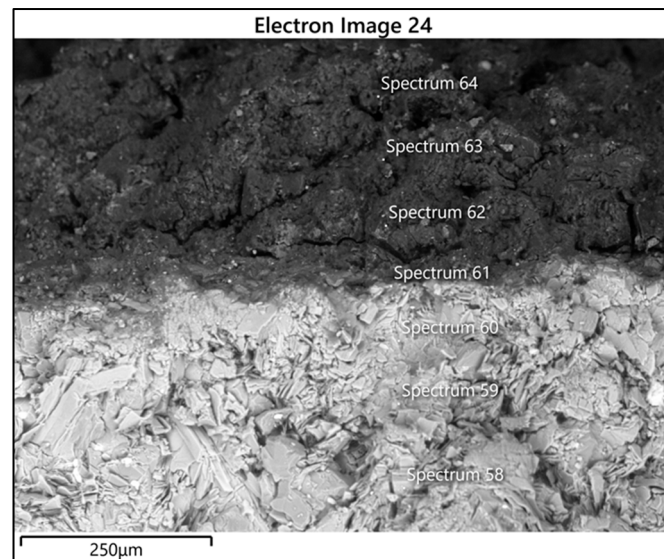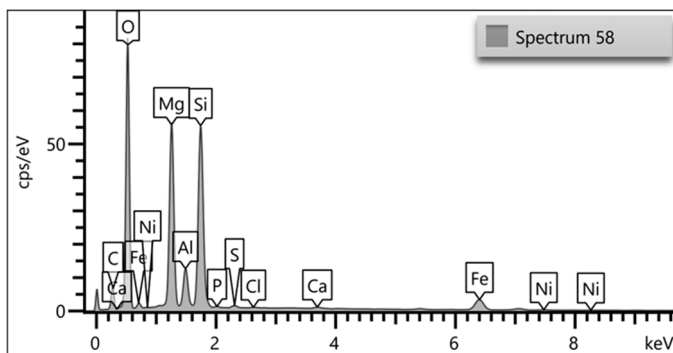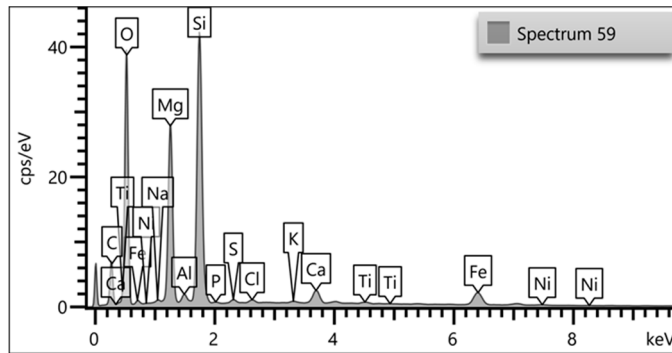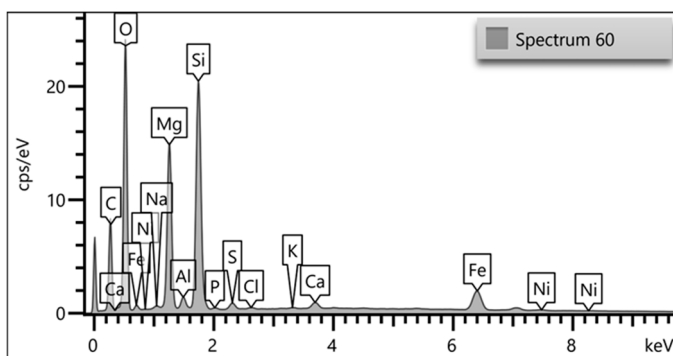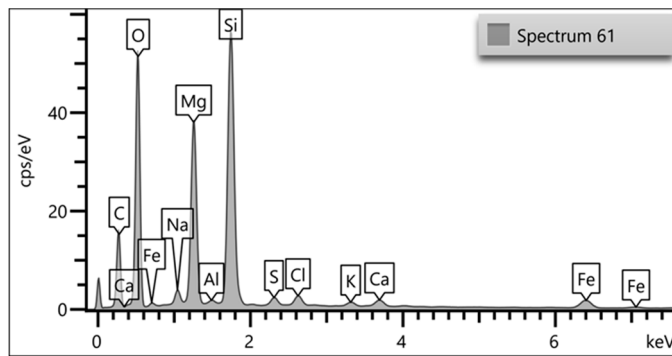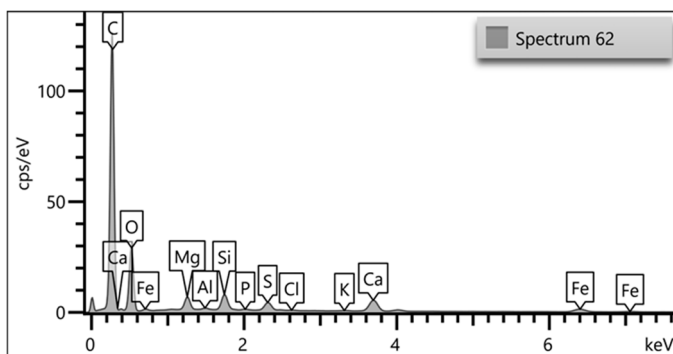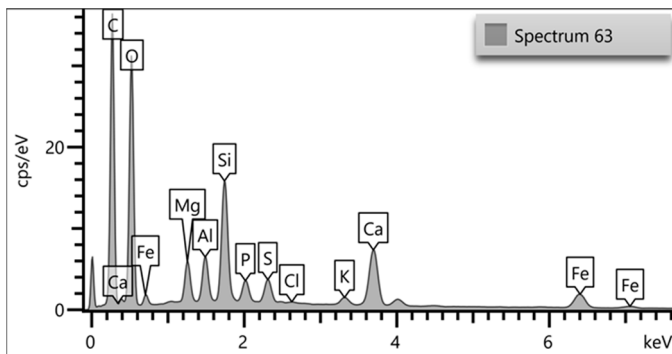

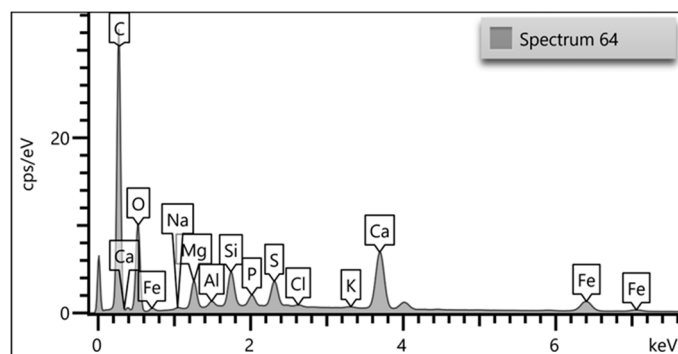

| Wt%         | C     | O     | Na   | Mg    | Al   | Si    | P    | S    | Cl   | K    | Ca   | Ti   | Fe   | Ni   | Total |
|-------------|-------|-------|------|-------|------|-------|------|------|------|------|------|------|------|------|-------|
| Spectrum 58 | 15,29 | 46,98 |      | 14,62 | 3,35 | 14,78 | 0,13 | 0,23 | 0,07 |      | 0,19 |      | 4,11 | 0,26 | 100   |
| Spectrum 59 | 22,86 | 42,9  | 0,19 | 11,1  | 0,49 | 15,92 | 0,11 | 0,25 | 0,25 | 0,15 | 1,37 | 0,27 | 3,89 | 0,24 | 100   |
| Spectrum 60 | 32,11 | 40,69 | 0,16 | 8,79  | 0,6  | 11,09 | 0,1  | 0,37 | 0,1  | 0,09 | 0,55 |      | 5,08 | 0,27 | 100   |
| Spectrum 61 | 30,99 | 40,71 | 0,96 | 9,61  | 0,17 | 13,41 |      | 0,48 | 0,64 | 0,34 | 0,59 |      | 2,09 |      | 100   |
| Spectrum 62 | 65,81 | 28,04 |      | 1,09  | 0,12 | 1,13  | 0,08 | 0,71 | 0,04 | 0,06 | 1,67 |      | 1,25 |      | 100   |
| Spectrum 63 | 46,91 | 37,39 |      | 1,57  | 1,57 | 3,99  | 0,86 | 0,95 | 0,06 | 0,41 | 3,61 |      | 2,68 |      | 100   |
| Spectrum 64 | 58,76 | 26,23 | 0,13 | 1,6   | 0,29 | 1,73  | 0,67 | 1,55 | 0,14 | 0,09 | 5,83 |      | 2,99 |      | 100   |

## SAMPLE 8

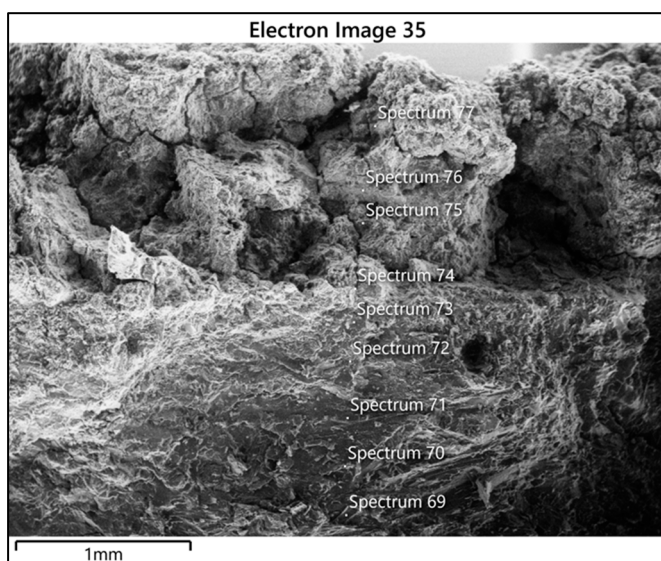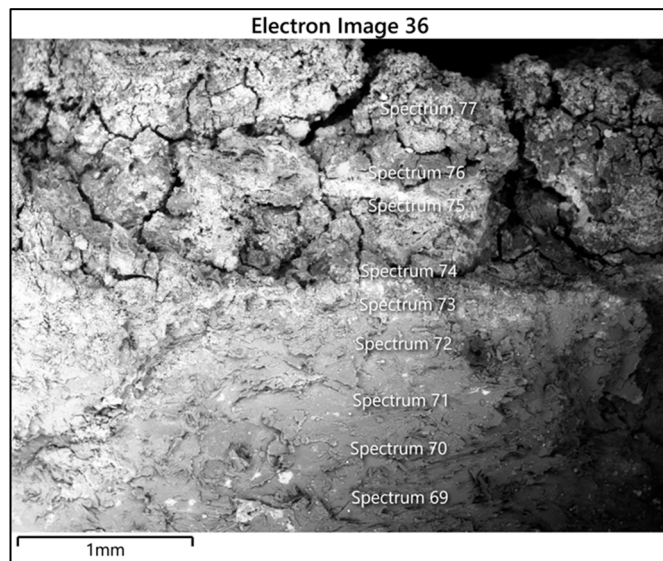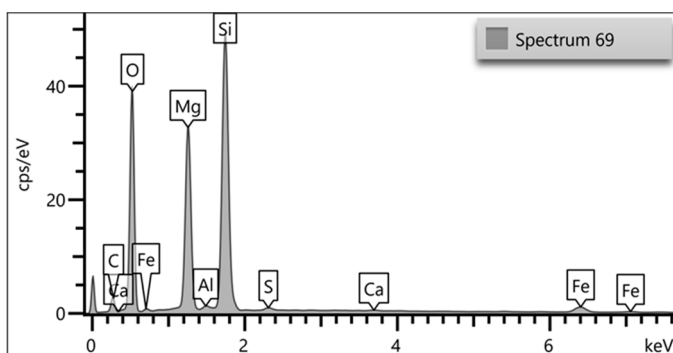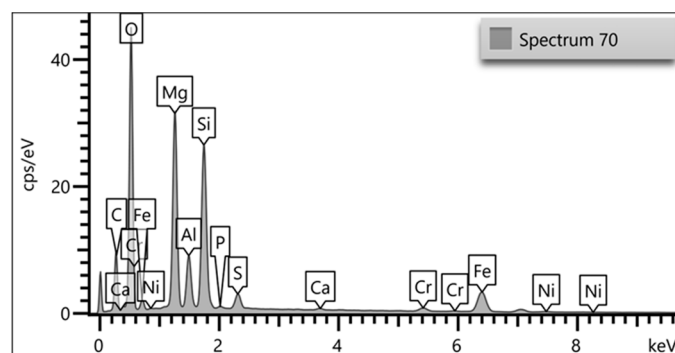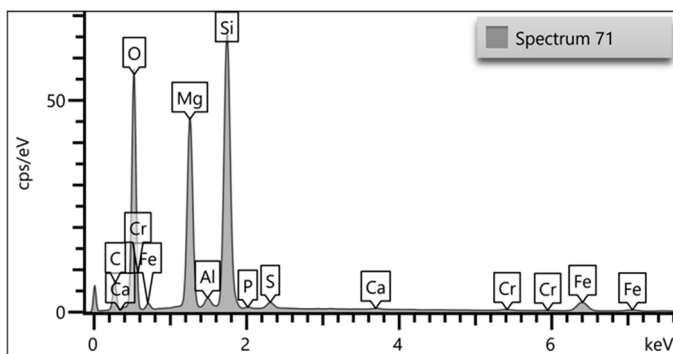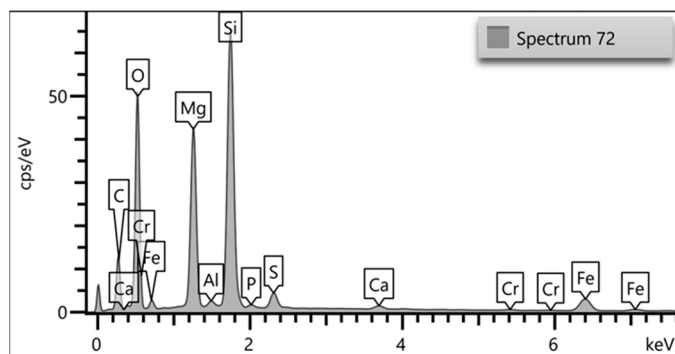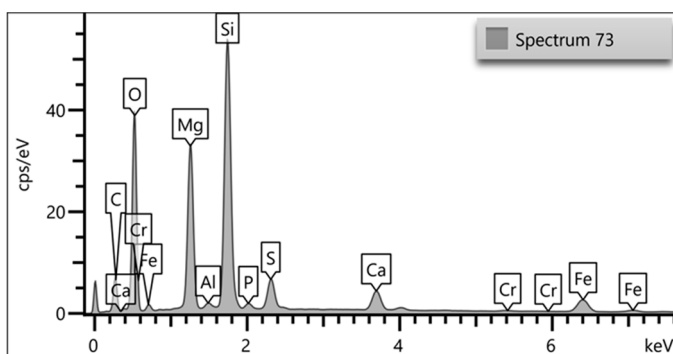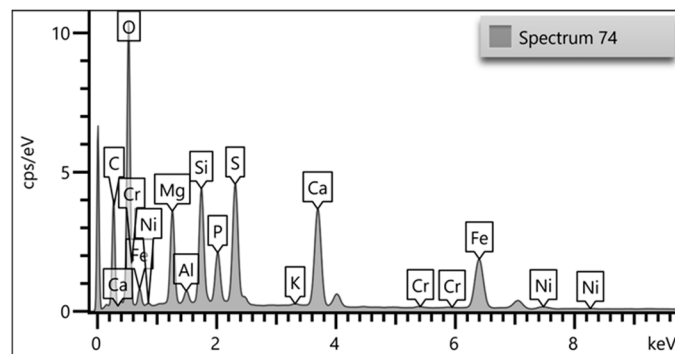

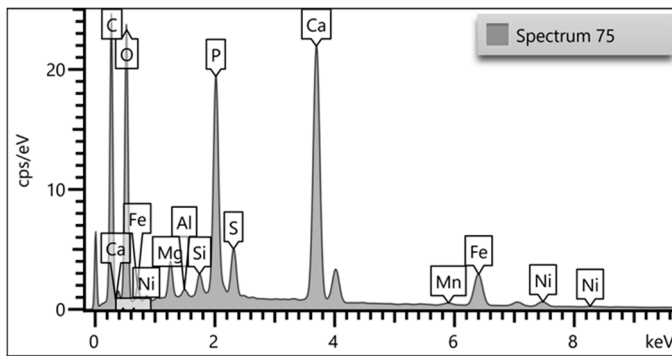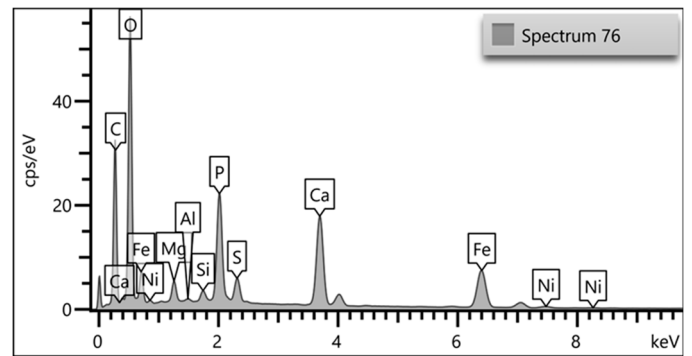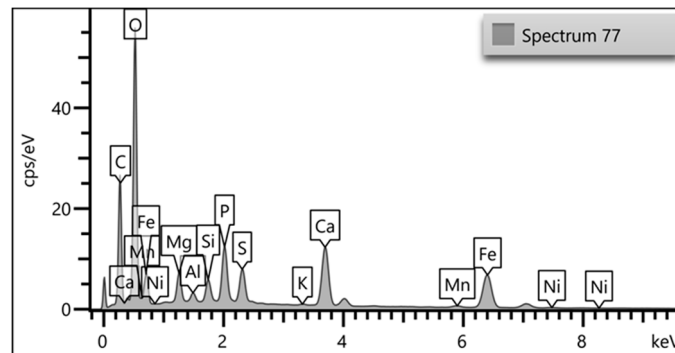

| Wt%         | C     | O     | Mg    | Al   | Si    | P    | S    | K    | Ca    | Cr   | Mn   | Fe   | Ni   | Total |
|-------------|-------|-------|-------|------|-------|------|------|------|-------|------|------|------|------|-------|
| Spectrum 69 | 12,87 | 45,22 | 15,35 | 0,26 | 23,57 |      | 0,27 |      | 0,12  |      |      | 2,33 |      | 100   |
| Spectrum 70 | 24,52 | 42,17 | 11,99 | 3,33 | 9,71  | 0,15 | 1,03 |      | 0,16  | 0,69 |      | 6,04 | 0,21 | 100   |
| Spectrum 71 | 18,78 | 43,44 | 13,49 | 0,66 | 19,38 | 0,14 | 0,54 |      | 0,13  | 0,21 |      | 3,24 |      | 100   |
| Spectrum 72 | 26,64 | 39,46 | 11,15 | 0,35 | 16,57 | 0,24 | 1,19 |      | 0,37  | 0,2  |      | 3,83 |      | 100   |
| Spectrum 73 | 20,7  | 40,01 | 11,38 | 0,34 | 17,76 | 0,5  | 2,58 |      | 2,39  | 0    |      | 4,34 |      | 100   |
| Spectrum 74 | 28,79 | 37,89 | 4,14  | 0,48 | 4,13  | 2,13 | 5,12 | 0,09 | 6,61  | 0,14 |      | 9,89 | 0,58 | 100   |
| Spectrum 75 | 37,36 | 34,99 | 1,14  | 0,18 | 0,51  | 6,1  | 1,5  |      | 12,42 |      | 0,24 | 4,52 | 1,04 | 100   |
| Spectrum 76 | 33,09 | 43,39 | 1,05  | 0,12 | 0,41  | 4,93 | 1,19 |      | 6,81  |      |      | 8,55 | 0,46 | 100   |
| Spectrum 77 | 32,26 | 45,22 | 1,73  | 0,46 | 1,01  | 2,98 | 1,91 | 0,08 | 5,2   |      | 0,35 | 8,62 | 0,19 | 100   |

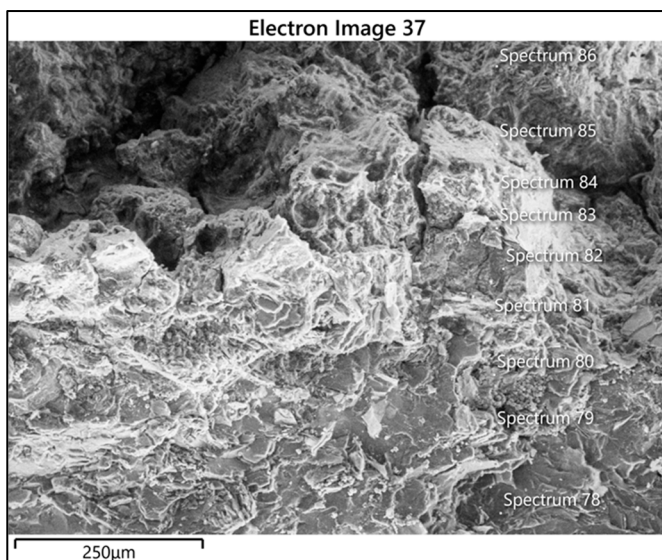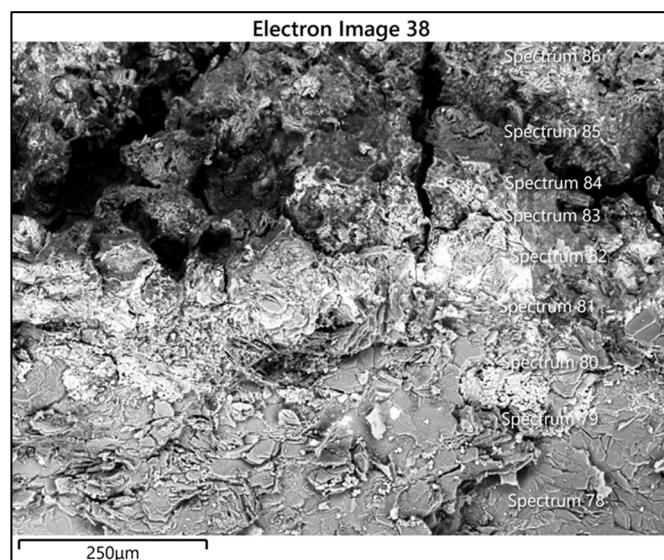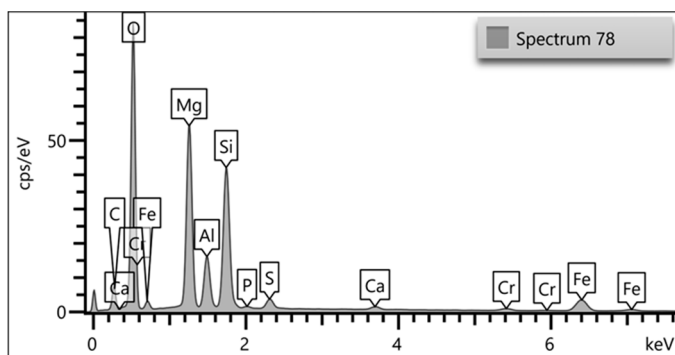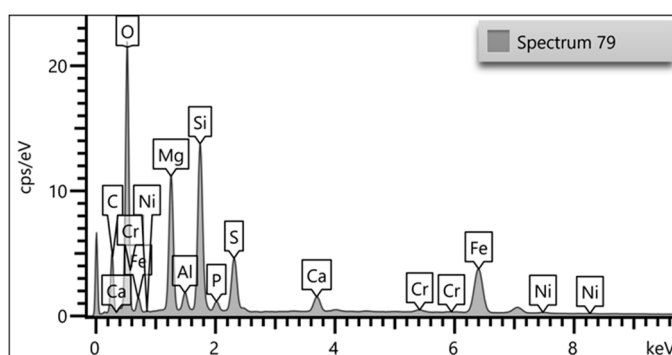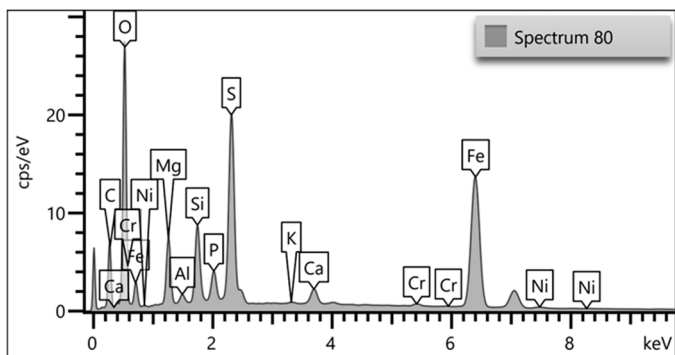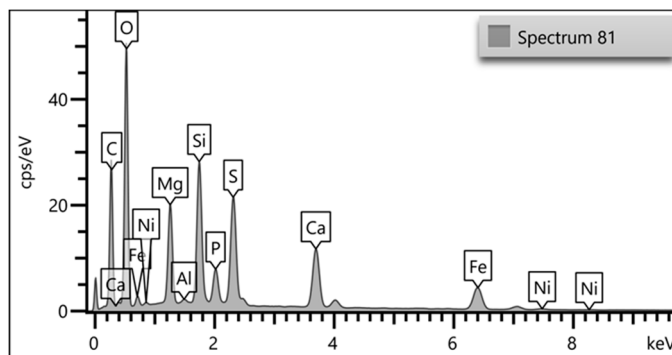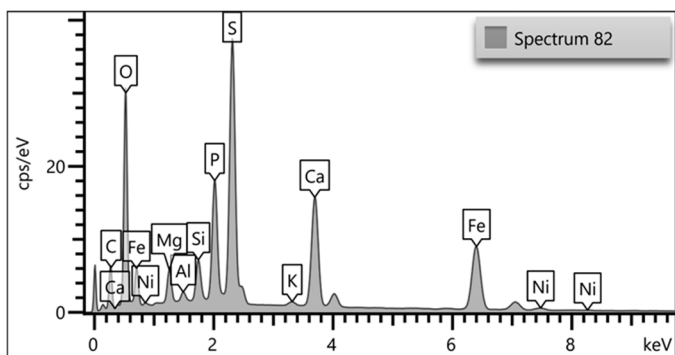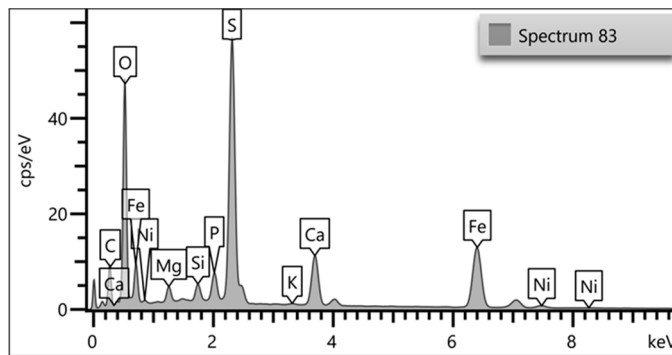

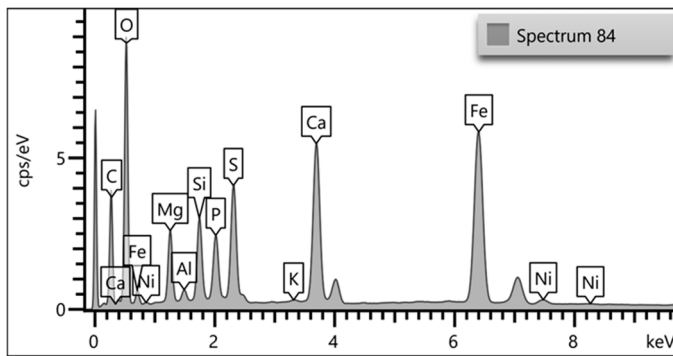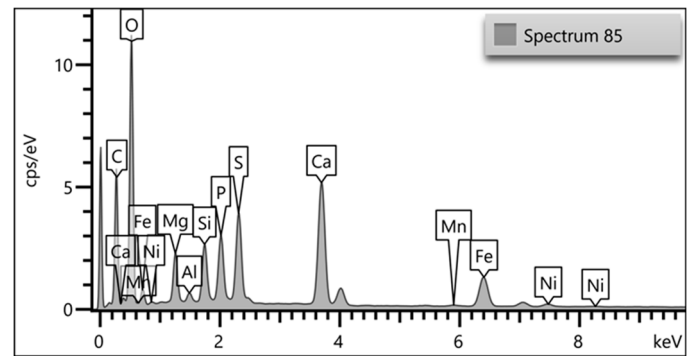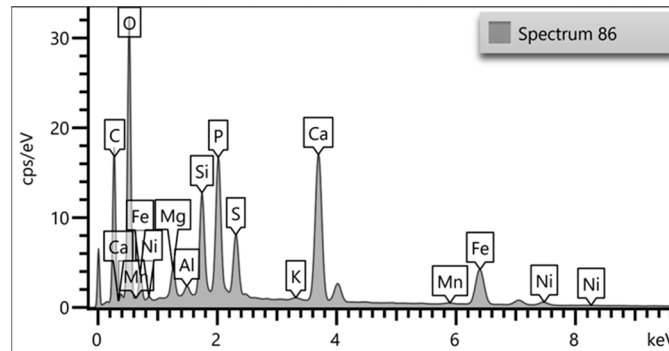

| Wt%         | C     | O     | Mg    | Al   | Si    | P    | S     | K    | Ca   | Cr   | Mn   | Fe    | Ni   | Total |
|-------------|-------|-------|-------|------|-------|------|-------|------|------|------|------|-------|------|-------|
| Spectrum 78 | 14,97 | 48,03 | 14,64 | 4,5  | 11,54 | 0,19 | 0,9   |      | 0,38 | 0,52 |      | 4,33  |      | 100   |
| Spectrum 79 | 23,68 | 39,44 | 8,42  | 1,04 | 9,01  | 0,65 | 3,4   |      | 1,42 | 0,38 |      | 12,2  | 0,36 | 100   |
| Spectrum 80 | 22,96 | 30,09 | 3,71  | 0,4  | 3,22  | 1,43 | 8,86  | 0,09 | 1,05 | 0,3  |      | 27,49 | 0,4  | 100   |
| Spectrum 81 | 36,08 | 38,77 | 4,3   | 0,14 | 5,19  | 1,52 | 4,86  |      | 4,21 |      |      | 4,65  | 0,28 | 100   |
| Spectrum 82 | 19,43 | 34,57 | 1,75  | 0,41 | 1,64  | 5,56 | 12,86 | 0,25 | 8,56 |      |      | 14,24 | 0,73 | 100   |
| Spectrum 83 | 21,03 | 38,27 | 1,03  |      | 0,84  | 1,58 | 15,11 | 0,11 | 4,76 |      |      | 16,4  | 0,87 | 100   |
| Spectrum 84 | 23,88 | 27,24 | 3,02  | 0,41 | 2,58  | 2,25 | 4,07  | 0,09 | 8,43 |      |      | 26,95 | 1,09 | 100   |
| Spectrum 85 | 30,58 | 41,32 | 2,31  | 0,37 | 2,2   | 2,87 | 4,05  |      | 8,97 |      | 0,17 | 6,35  | 0,81 | 100   |
| Spectrum 86 | 32,17 | 38,97 | 1,09  | 0,31 | 3,19  | 5,12 | 2,49  | 0,11 | 9,08 |      | 0,16 | 6,49  | 0,82 | 100   |
