# Supplementary material for: Archaeometric Analysis of Encrustations Adhering to Pietra Ollare Fragments from the Medieval Village of Nogara
Source: MDPI journal article supplement (doi:10.3390/heritage6040178), 2023-03-23
Supplement: s1 [file s1]

SAMPLE 1

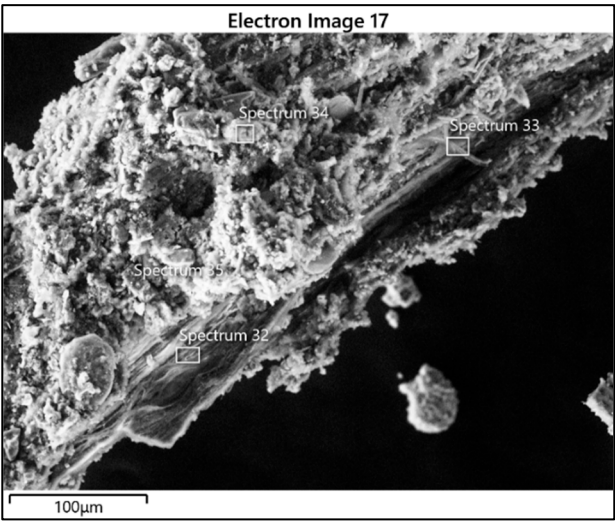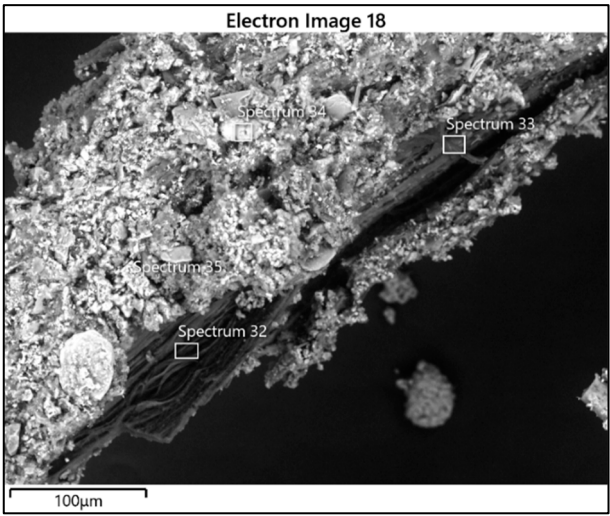

| Wt%    | C     | O     | Na   | Mg   | Al | Si   | P    | S   | K    | Ca   | Ti   | Fe   | Total |
|--------|-------|-------|------|------|----|------|------|-----|------|------|------|------|-------|
| Sp. 34 | 19,23 | 61,46 | 0,08 | 0,23 | 1  | 2,36 | 1,17 | 0,3 | 0,32 | 4,07 | 0,08 | 9,71 | 100   |

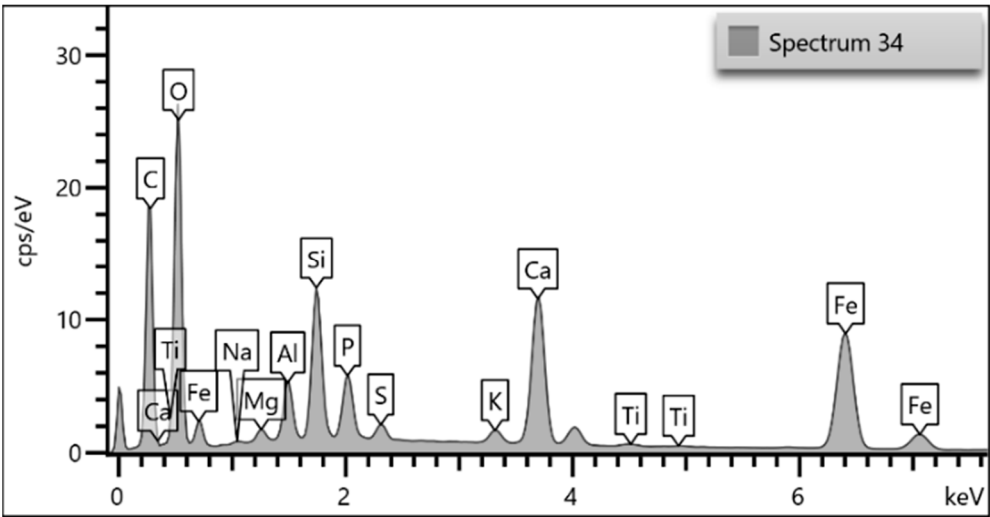

SAMPLE 2

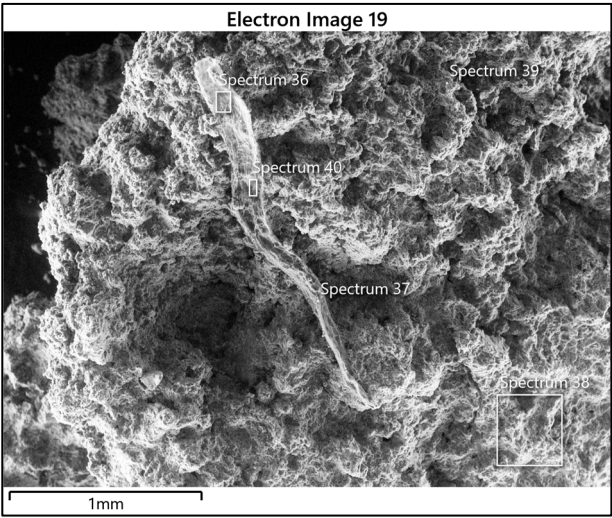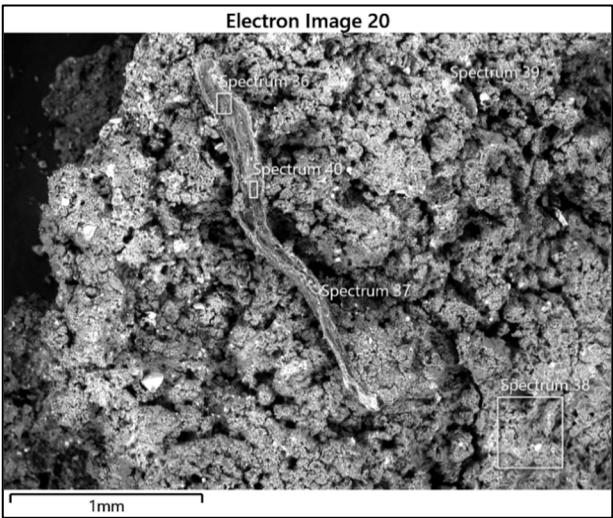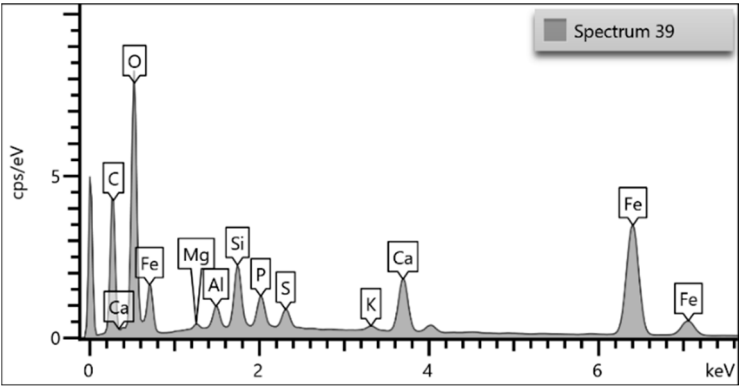

| Wt%    | C     | O     | Mg  | Al   | Si   | P    | S    | K    | Ca   | Ti | Mn | Fe    | Total |
|--------|-------|-------|-----|------|------|------|------|------|------|----|----|-------|-------|
| Sp. 39 | 18,21 | 58,96 | 0,2 | 0,67 | 1,72 | 0,98 | 0,59 | 0,18 | 2,54 |    |    | 15,96 | 100   |



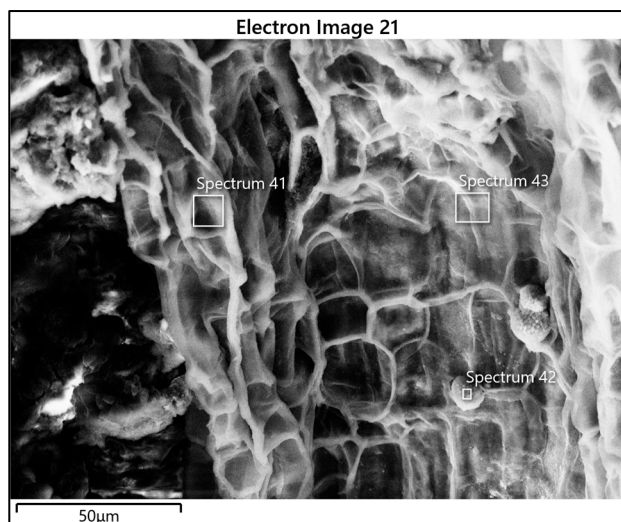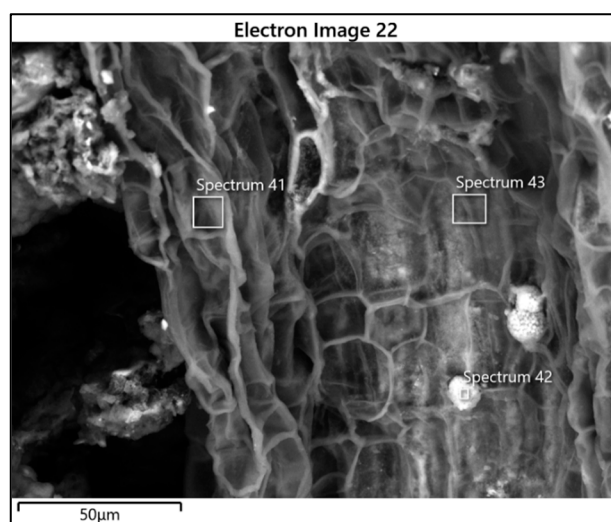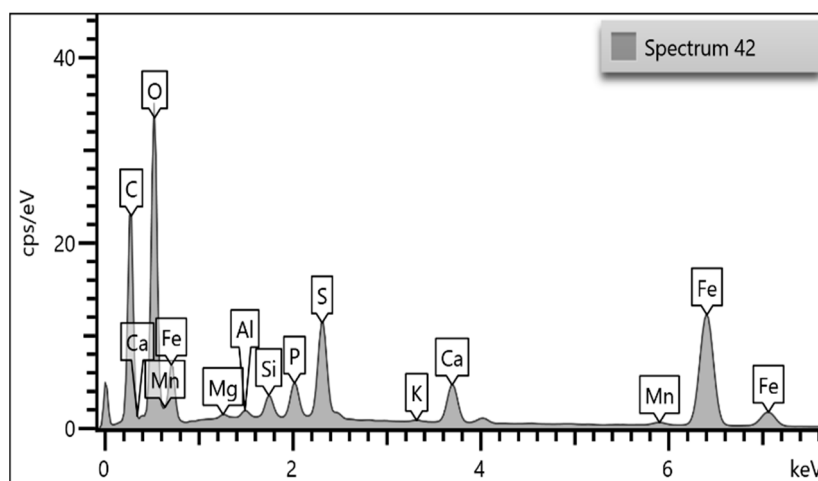

| Wt%    | C     | O     | Mg   | Al   | Si   | P    | S    | K    | Ca   | Mn   | Fe    | Total |
|--------|-------|-------|------|------|------|------|------|------|------|------|-------|-------|
| Sp. 42 | 20,35 | 62,95 | 0,09 | 0,15 | 0,41 | 0,75 | 2,14 | 0,05 | 1,31 | 0,24 | 11,57 | 100   |

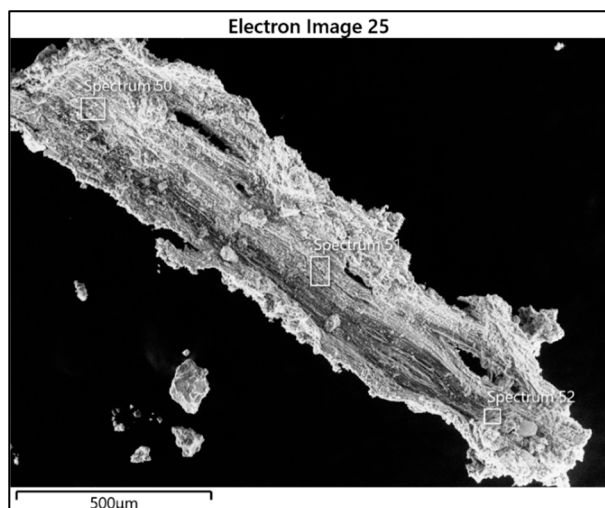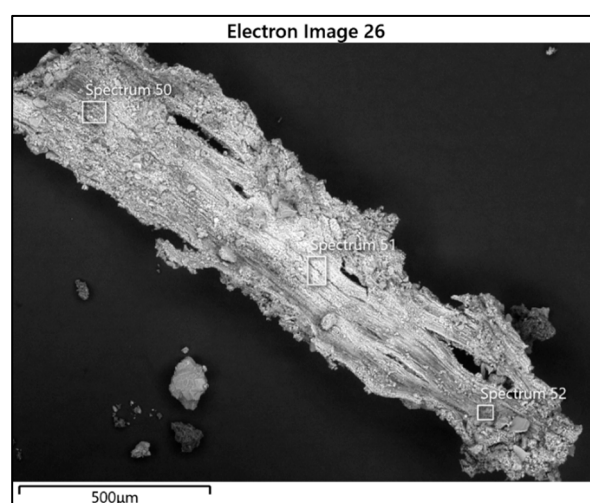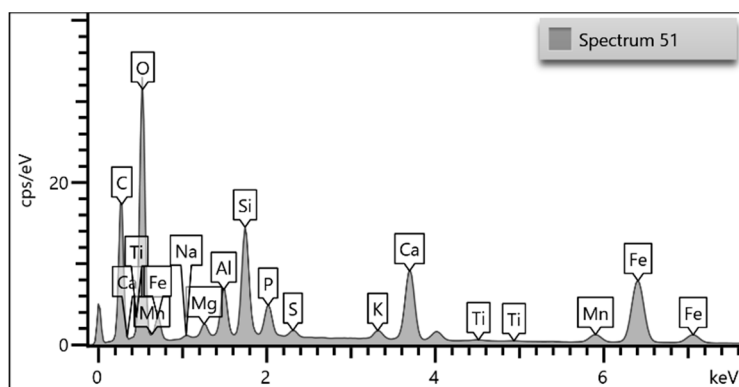

| Wt%    | C     | O     | Na   | Mg   | Al   | Si  | P    | S    | K    | Ca   | Ti   | Mn   | Fe   | Total |
|--------|-------|-------|------|------|------|-----|------|------|------|------|------|------|------|-------|
| Sp. 51 | 19,06 | 61,45 | 0,15 | 0,44 | 1,39 | 2,9 | 0,97 | 0,21 | 0,35 | 3,31 | 0,06 | 0,93 | 8,79 | 100   |

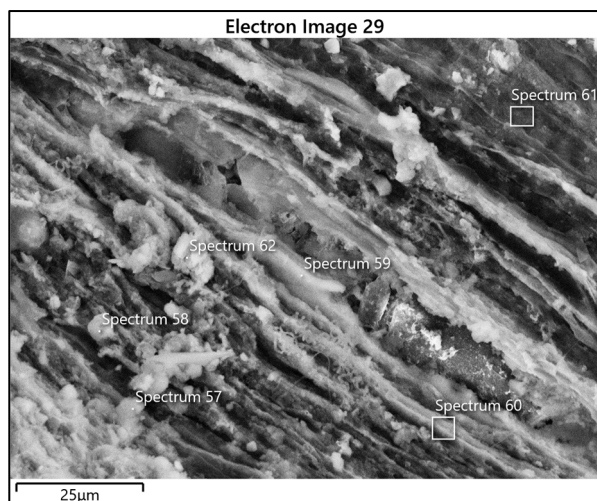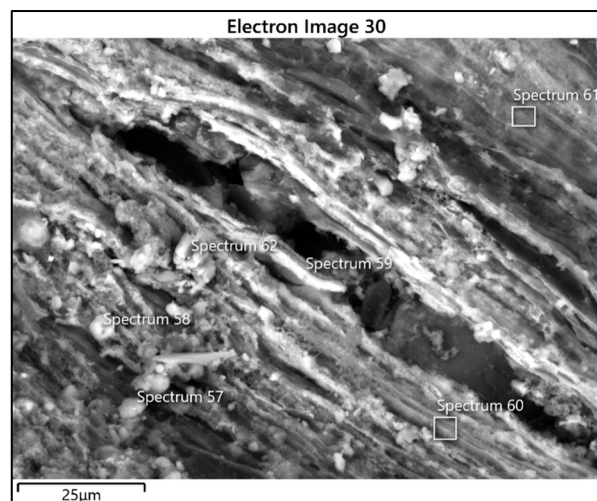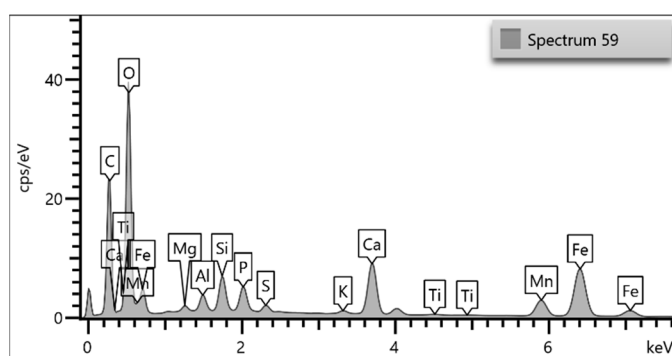

| Wt%    | C    | O     | Na | Mg   | Al   | Si   | P    | S    | K    | Ca   | Ti   | Mn   | Fe   | Total |
|--------|------|-------|----|------|------|------|------|------|------|------|------|------|------|-------|
| Sp. 59 | 20,5 | 62,51 |    | 0,23 | 0,57 | 1,15 | 0,91 | 0,28 | 0,15 | 2,98 | 0,06 | 2,42 | 8,24 | 100   |

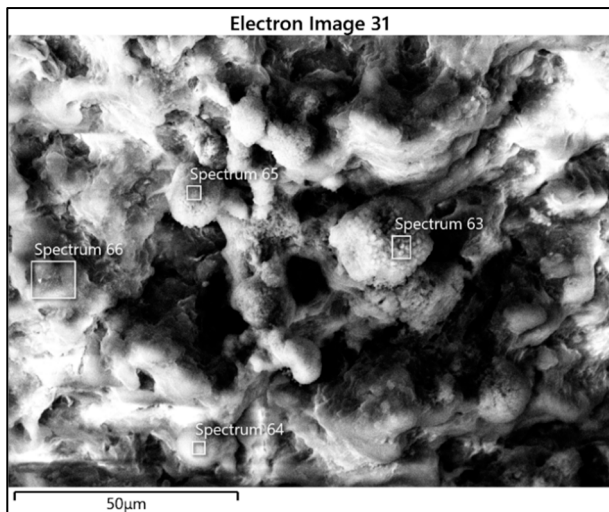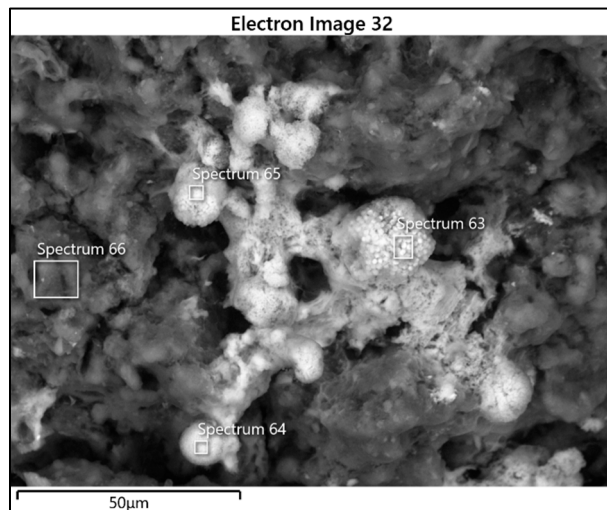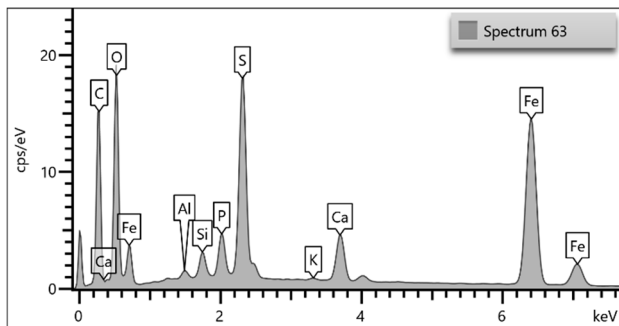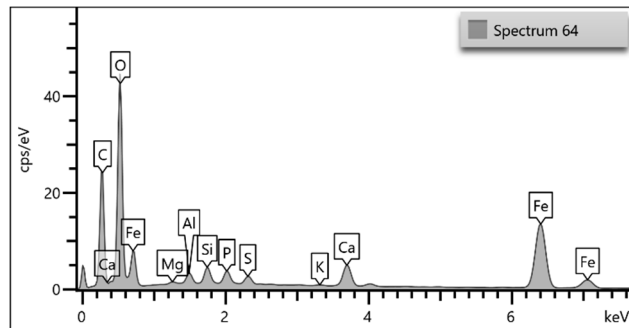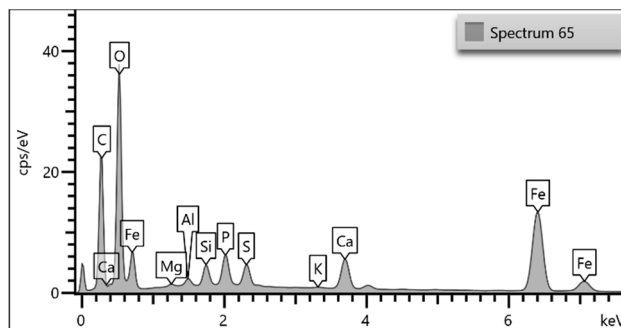

| Wt%    | C     | O     | Mg  | Al   | Si   | P    | S    | K    | Ca   | Fe    | Total |
|--------|-------|-------|-----|------|------|------|------|------|------|-------|-------|
| Sp. 63 | 17,82 | 60,05 |     | 0,14 | 0,42 | 0,84 | 3,95 | 0,06 | 1,4  | 15,3  | 100   |
| Sp. 64 | 20,63 | 61,99 | 0,1 | 0,46 | 0,65 | 0,58 | 0,37 | 0,06 | 1,45 | 13,71 | 100   |
| Sp. 65 | 20,12 | 61,8  | 0,1 | 0,24 | 0,67 | 1,1  | 0,8  | 0,04 | 1,66 | 13,46 | 100   |



## SAMPLE 3

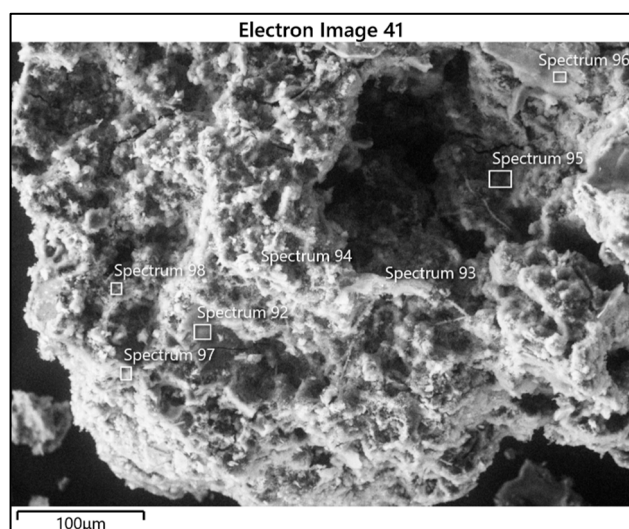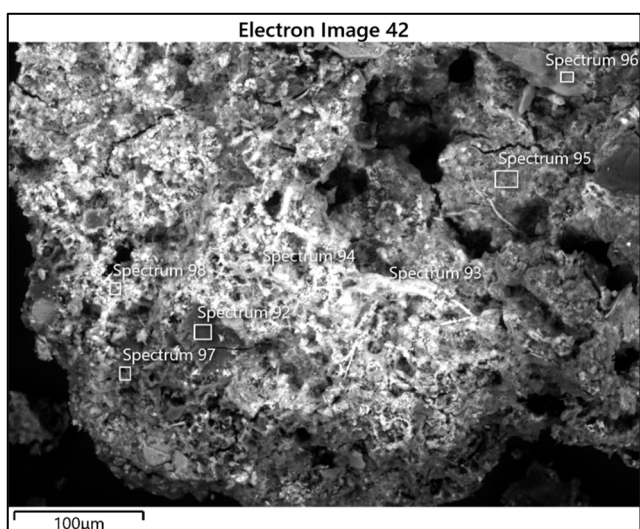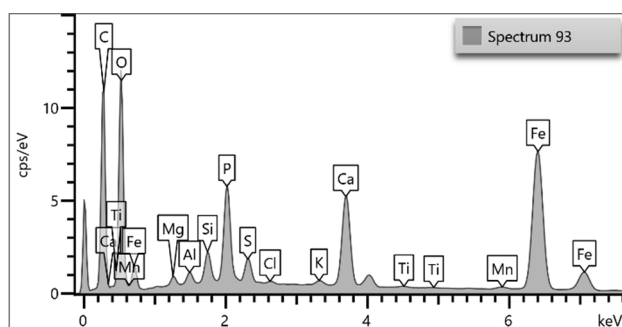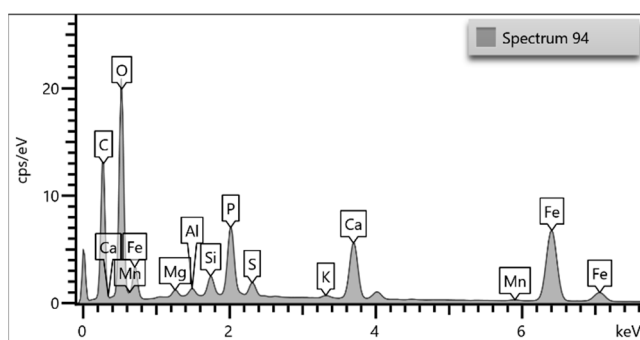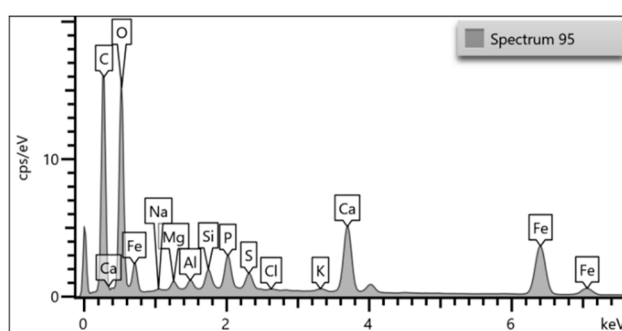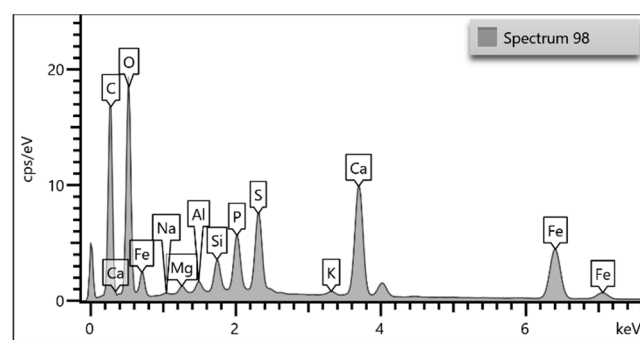

| Wt%    | C     | O     | Na   | Mg   | Al   | Si   | P    | S    | Cl   | K    | Ca   | Ti   | Mn   | Fe    | Total |
|--------|-------|-------|------|------|------|------|------|------|------|------|------|------|------|-------|-------|
| Sp. 93 | 19,03 | 60,31 |      | 0,22 | 0,24 | 0,55 | 2,01 | 0,54 | 0,07 | 0,13 | 2,93 | 0,05 | 0,18 | 13,72 | 100   |
| Sp. 94 | 34,01 | 34,62 |      | 0,41 | 0,37 | 0,91 | 3,87 | 0,83 |      | 0,19 | 4,45 |      | 0,24 | 20,11 | 100   |
| Sp. 95 | 22,54 | 65,74 | 0,08 | 0,25 | 0,24 | 0,44 | 0,9  | 0,43 | 0,05 | 0,1  | 2,84 |      |      | 6,4   | 100   |
| Sp. 98 | 20,77 | 64,54 | 0,06 | 0,19 | 0,24 | 0,67 | 1,35 | 1,97 |      | 0,13 | 4,29 |      |      | 5,8   | 100   |

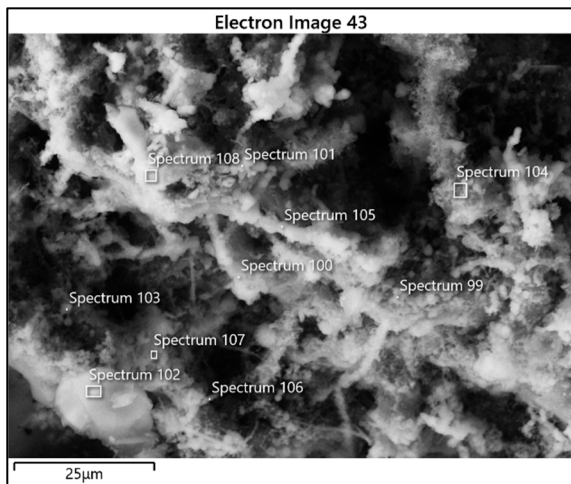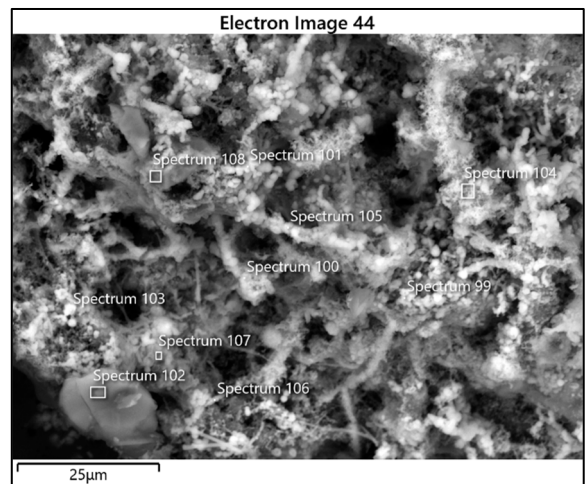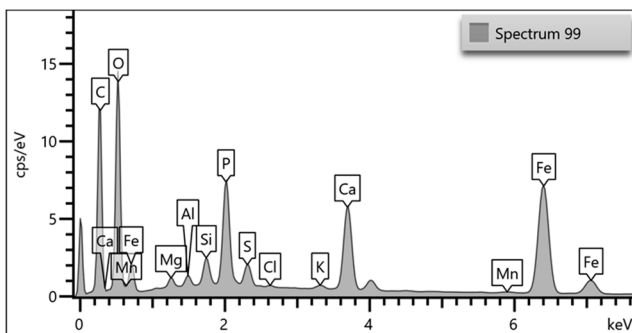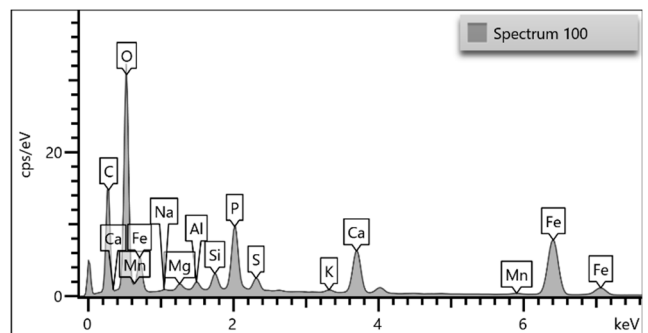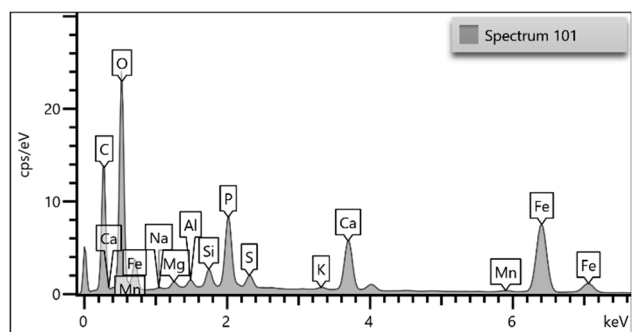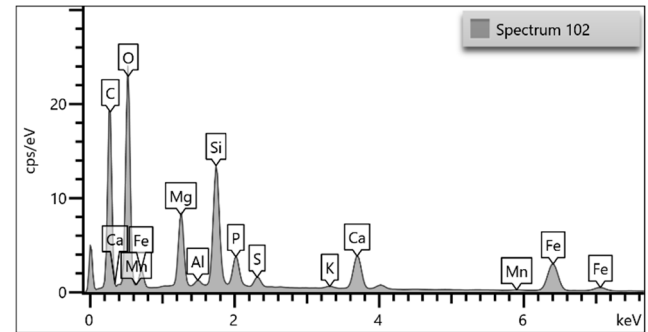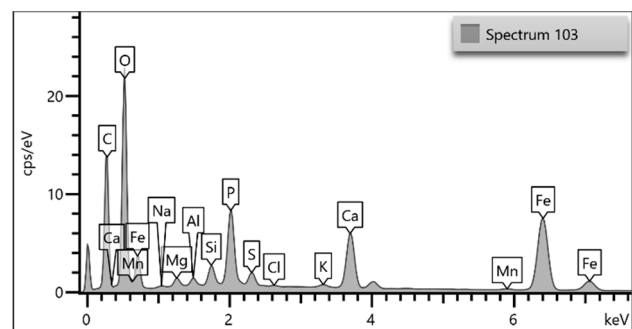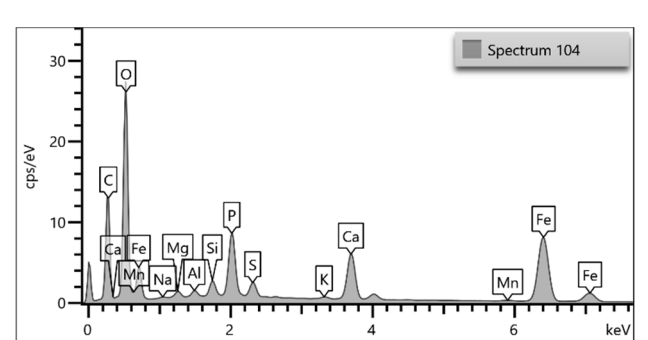

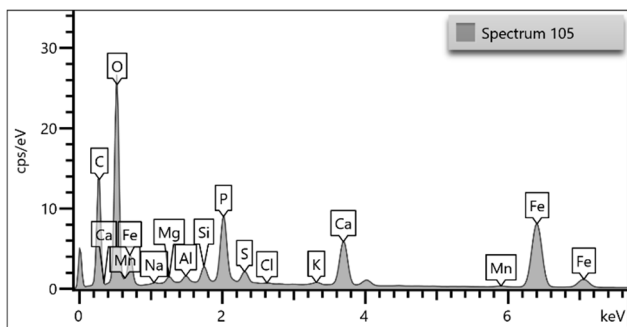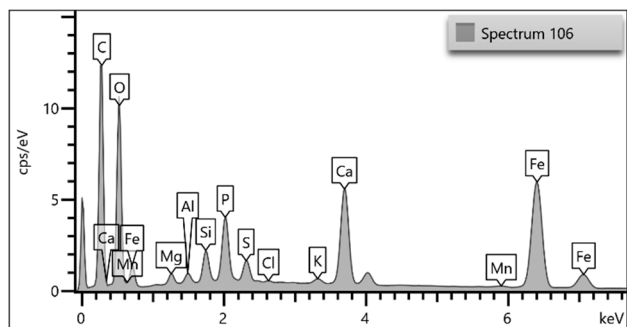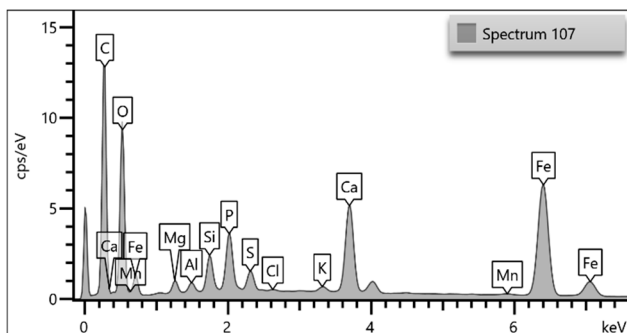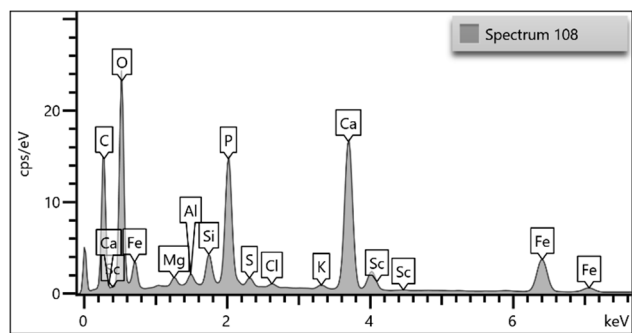

| Wt%     | C     | O     | Na   | Mg   | Al   | Si   | P    | S    | Cl   | K    | Ca   | Sc   | Mn   | Fe    | Total |
|---------|-------|-------|------|------|------|------|------|------|------|------|------|------|------|-------|-------|
| Sp. 99  | 19,4  | 61,32 |      | 0,26 | 0,25 | 0,55 | 2,42 | 0,54 | 0,05 | 0,12 | 3,06 |      | 0,08 | 11,97 | 100   |
| Sp. 100 | 19,54 | 61,84 | 0,09 | 0,27 | 0,33 | 0,6  | 2,66 | 0,55 |      | 0,16 | 2,82 |      | 0,18 | 10,97 | 100   |
| Sp. 101 | 19,6  | 61,68 | 0,08 | 0,25 | 0,26 | 0,55 | 2,51 | 0,45 |      | 0,1  | 2,79 |      | 0,19 | 11,54 | 100   |
| Sp. 102 | 21,81 | 66,35 |      | 2,25 | 0,15 | 2,98 | 0,86 | 0,3  |      | 0,07 | 1,5  |      | 0,06 | 3,67  | 100   |
| Sp. 103 | 19,69 | 61,8  | 0,07 | 0,29 | 0,24 | 0,56 | 2,45 | 0,46 | 0,05 | 0,11 | 2,85 |      | 0,16 | 11,27 | 100   |
| Sp. 104 | 19,03 | 60,87 | 0,07 | 0,27 | 0,24 | 0,56 | 2,61 | 0,63 |      | 0,12 | 2,95 |      | 0,13 | 12,54 | 100   |
| Sp. 105 | 19,39 | 61,37 | 0,08 | 0,28 | 0,24 | 0,55 | 2,62 | 0,47 | 0,05 | 0,12 | 2,72 |      | 0,13 | 11,98 | 100   |
| Sp. 106 | 20,36 | 62,27 |      | 0,26 | 0,2  | 0,61 | 1,38 | 0,48 | 0,05 | 0,15 | 3,25 |      | 0,11 | 10,88 | 100   |
| Sp. 107 | 20,44 | 62,27 |      | 0,31 | 0,19 | 0,67 | 1,21 | 0,44 | 0,04 | 0,15 | 2,91 |      | 0,09 | 11,28 | 100   |
| Sp. 108 | 18,99 | 62,22 |      | 0,3  | 0,31 | 0,85 | 4,01 | 0,3  | 0,13 | 0,18 | 7,65 | 0,09 |      | 4,97  | 100   |

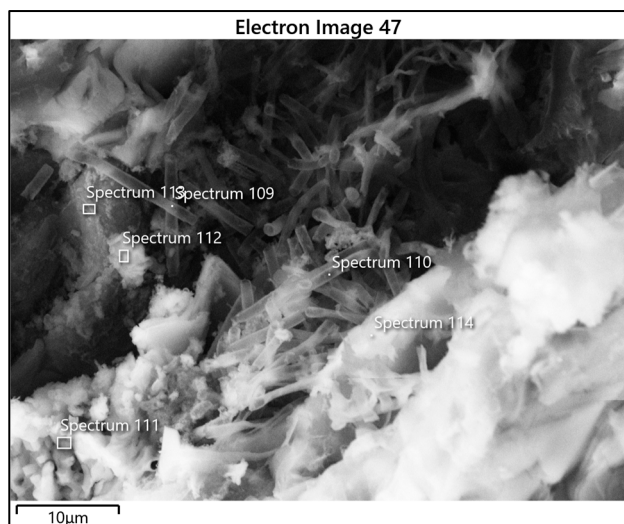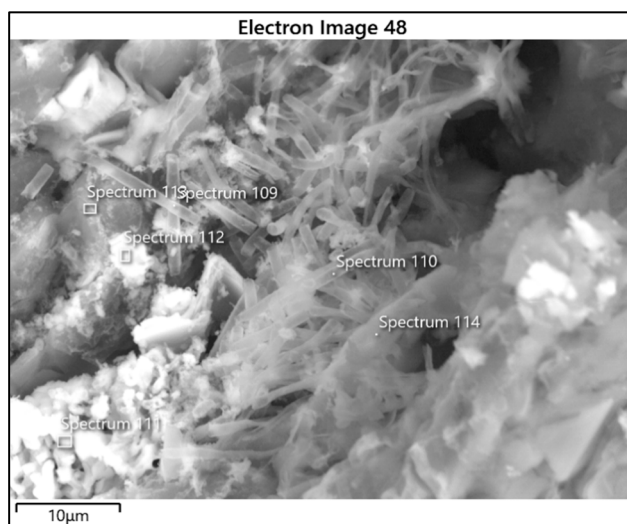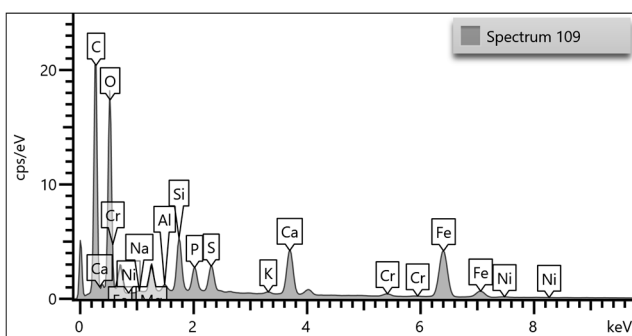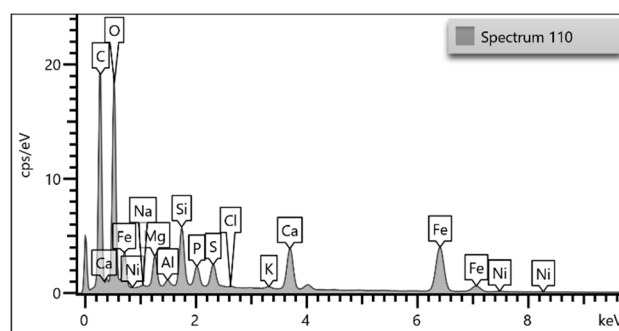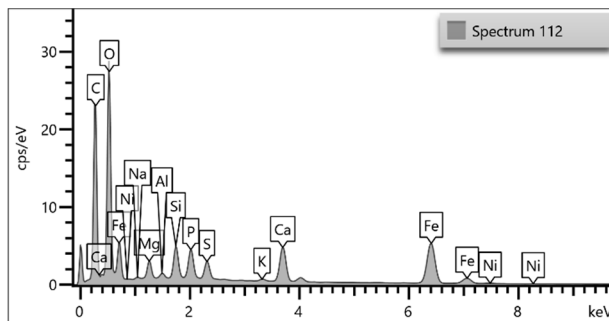

| Wt%     | C     | O     | Na   | Mg   | Al   | Si   | P    | S    | Cl   | K    | Ca   | Cr   | Fe   | Ni   | Total |
|---------|-------|-------|------|------|------|------|------|------|------|------|------|------|------|------|-------|
| Sp. 109 | 22,54 | 66,27 | 0,06 | 0,78 | 0,15 | 1,16 | 0,61 | 0,66 |      | 0,07 | 1,78 | 0,19 | 5,63 | 0,1  | 100   |
| Sp. 110 | 22,53 | 66,28 | 0,06 | 0,9  | 0,15 | 1,37 | 0,53 | 0,6  | 0,04 | 0,07 | 1,72 |      | 5,65 | 0,1  | 100   |
| Sp. 111 | 18,94 | 63,07 |      | 0,42 | 0,13 | 0,66 | 0,87 | 4,23 |      | 0,1  | 5,98 |      | 5,6  |      | 100   |
| Sp. 112 | 22,39 | 65,97 | 0,1  | 0,64 | 0,15 | 0,92 | 0,94 | 0,6  |      | 0,09 | 1,79 |      | 6,32 | 0,09 | 100   |



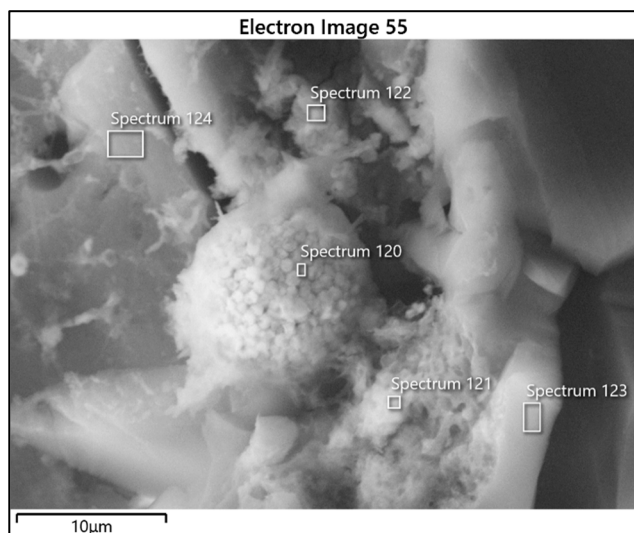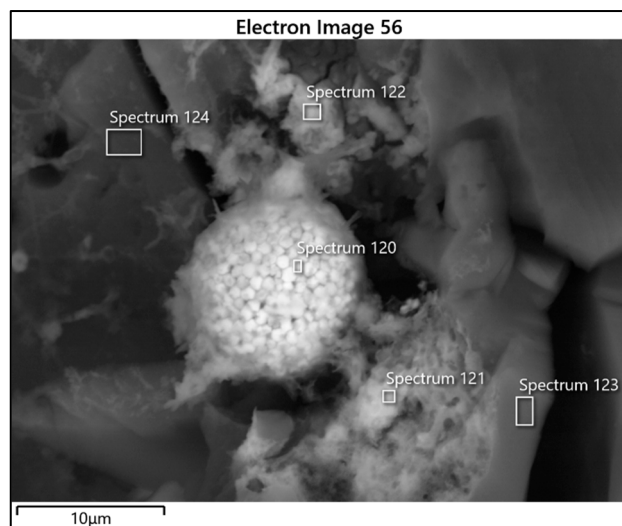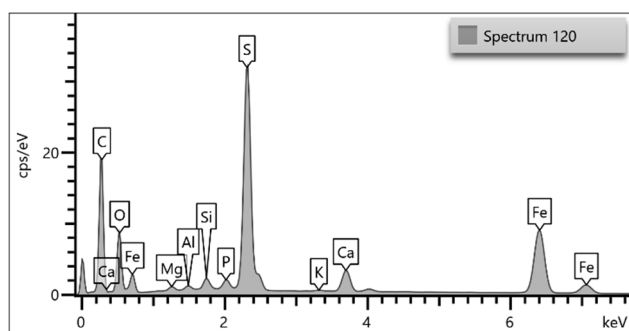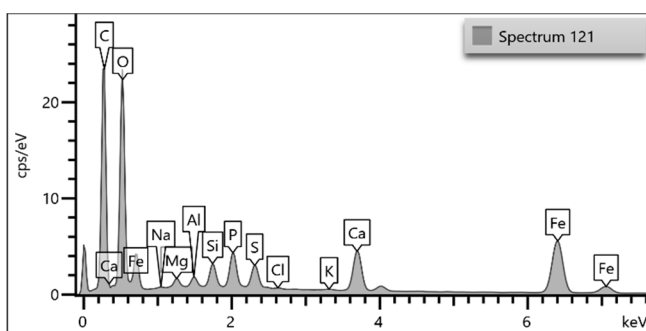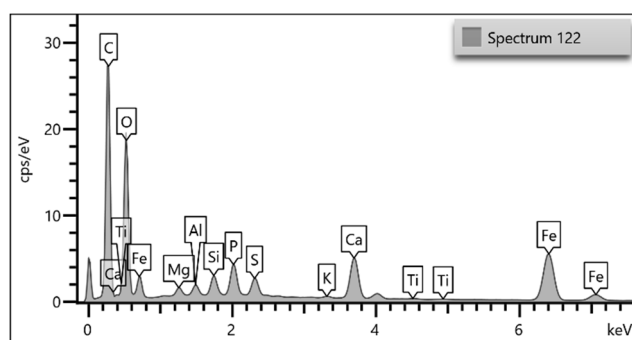

| Wt%     | C     | O     | Na   | Mg   | Al   | Si   | P    | S     | Cl   | K    | Ca   | Ti   | Fe    | Total |
|---------|-------|-------|------|------|------|------|------|-------|------|------|------|------|-------|-------|
| Sp. 120 | 51,37 | 14,24 |      | 0,21 | 0,18 | 0,47 | 0,49 | 12,75 |      | 0,07 | 1,75 |      | 18,47 | 100   |
| Sp. 121 | 22,8  | 66,36 | 0,05 | 0,24 | 0,25 | 0,53 | 0,91 | 0,6   | 0,04 | 0,03 | 1,65 |      | 6,54  | 100   |
| Sp. 122 | 47,1  | 31,43 |      | 0,44 | 0,49 | 0,88 | 1,72 | 1,04  |      | 0,13 | 3,26 | 0,09 | 13,43 | 100   |
| Sp. 124 | 26,3  | 71,43 |      | 0,16 | 0,08 | 0,17 | 0,07 | 0,23  |      | 0,02 | 0,96 |      | 0,57  | 100   |

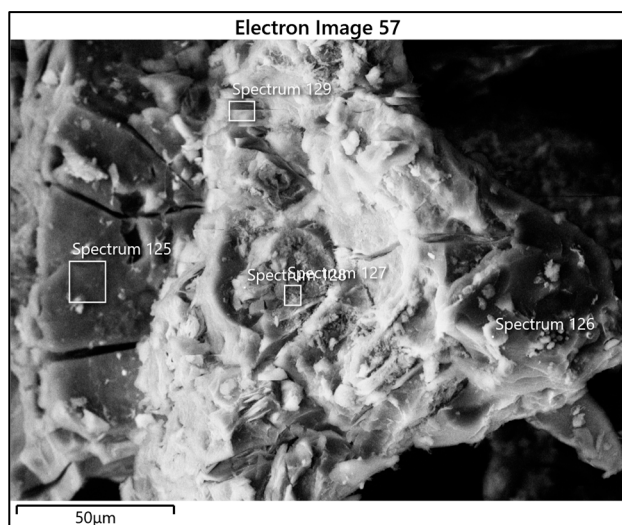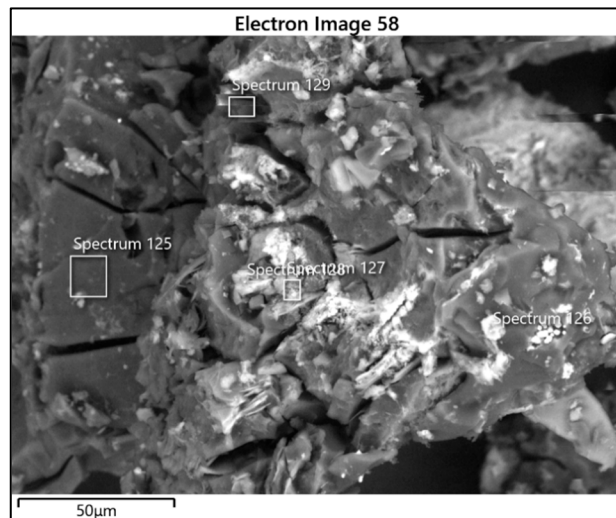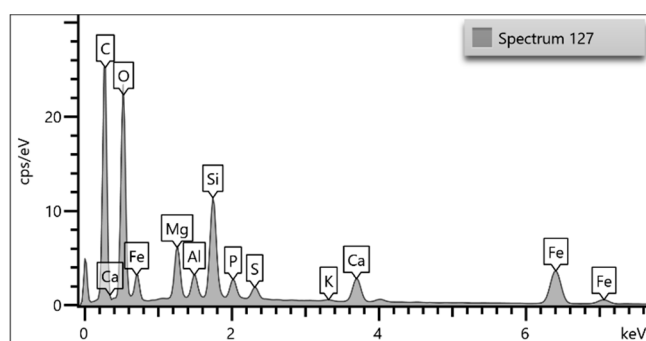

| Wt%     | C     | O     | Mg   | Al   | Si  | P    | S   | K    | Ca   | Mn | Fe  | Total |
|---------|-------|-------|------|------|-----|------|-----|------|------|----|-----|-------|
| Sp. 127 | 22,99 | 67,52 | 1,36 | 0,54 | 2,1 | 0,47 | 0,3 | 0,04 | 0,88 |    | 3,8 | 100   |

## SAMPLE 4

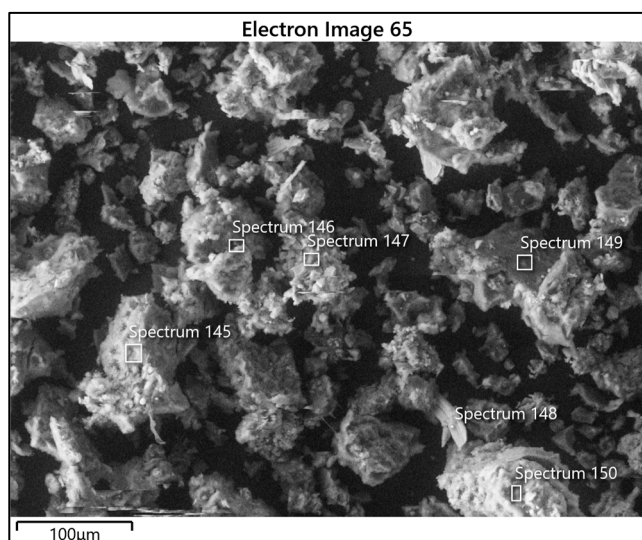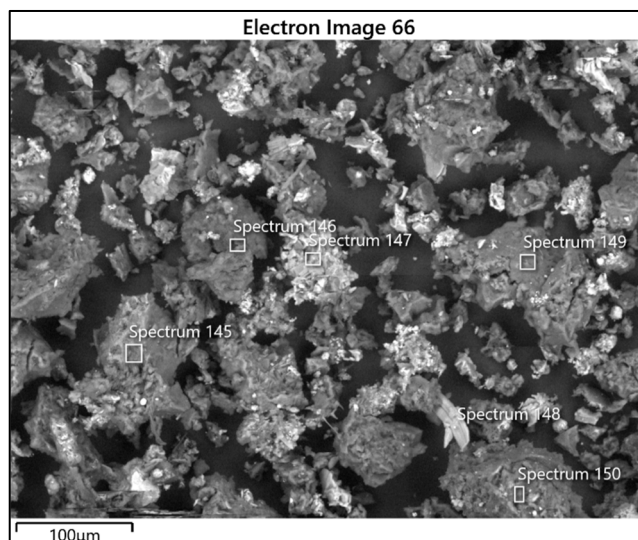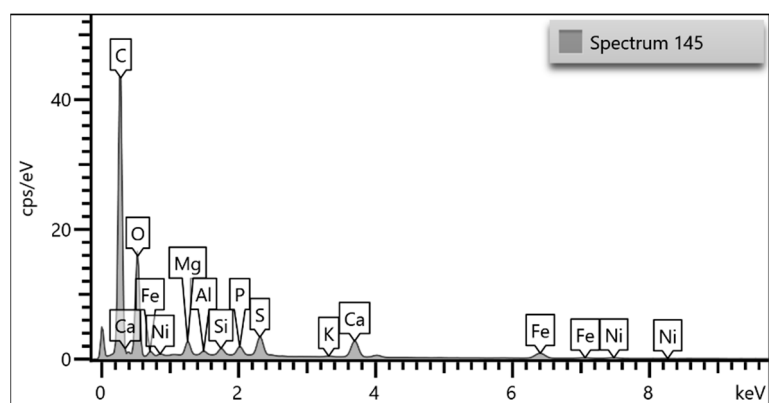

| Wt%     | C     | O     | Mg   | Al   | Si   | P    | S    | K    | Ca   | Sc | Fe   | Ni   | Total |
|---------|-------|-------|------|------|------|------|------|------|------|----|------|------|-------|
| Sp. 145 | 59,37 | 32,57 | 0,93 | 0,24 | 0,39 | 0,64 | 1,47 | 0,08 | 1,84 |    | 2,03 | 0,44 | 100   |

| wt%     | C     | O     | Mg   | Al   | Si   | P    | S    | K    | Ca   | Fe   | Ni   | Total |
|---------|-------|-------|------|------|------|------|------|------|------|------|------|-------|
| Sp. 157 | 60,76 | 30,3  | 0,87 | 0,39 | 0,54 | 0,1  | 2,44 | 0,1  | 1,09 | 2,79 | 0,62 | 100   |
| Sp. 158 | 20,2  | 65,96 | 0,19 | 0,09 | 0,21 | 0,05 | 5,86 | 0,05 | 6,61 | 0,6  | 0,17 | 100   |
| Sp. 159 | 21,06 | 65,68 | 0,28 | 0,13 | 0,39 | 0,06 | 3,63 | 0,06 | 7,35 | 1,14 | 0,23 | 100   |
| Sp. 160 | 23,01 | 68,35 | 0,44 | 0,24 | 2,11 | 0,16 | 1,81 | 0,08 | 1,14 | 2,41 | 0,25 | 100   |

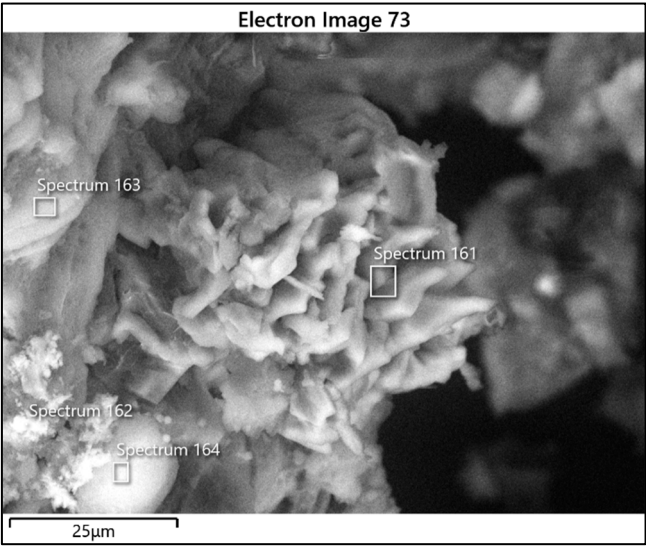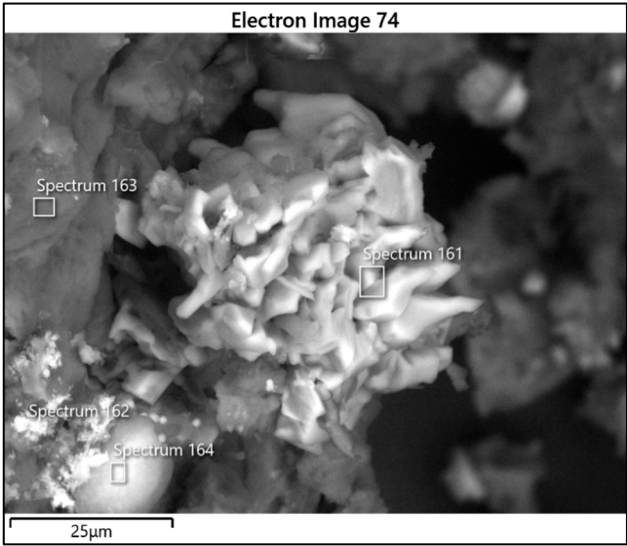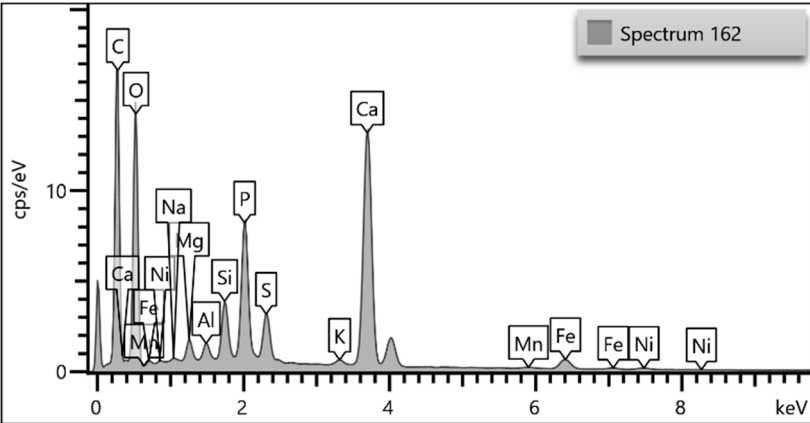

| Wt%     | C     | O     | Na   | Mg   | Al   | Si   | P    | S    | K   | Ca    | Mn   | Fe   | Ni   | Total |
|---------|-------|-------|------|------|------|------|------|------|-----|-------|------|------|------|-------|
| Sp. 162 | 41,26 | 36,01 | 0,11 | 0,63 | 0,44 | 1,51 | 4,42 | 1,72 | 0,2 | 11,53 | 0,16 | 1,68 | 0,32 | 100   |

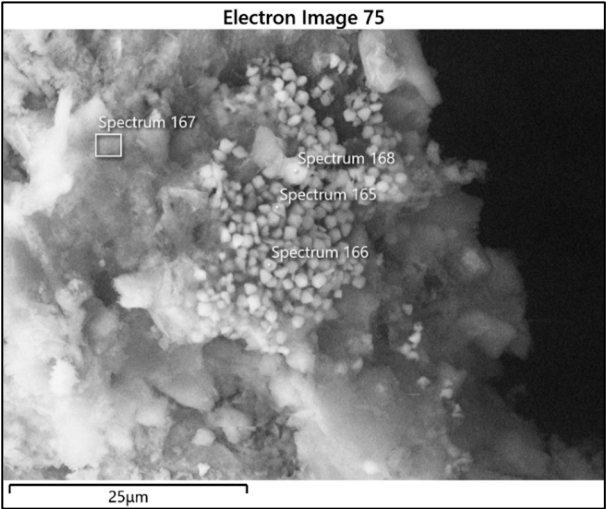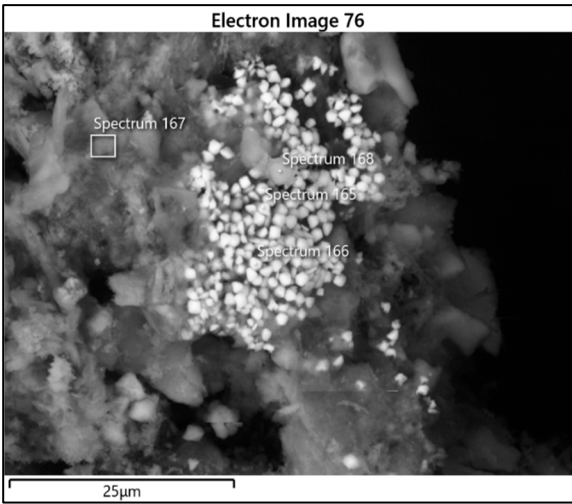



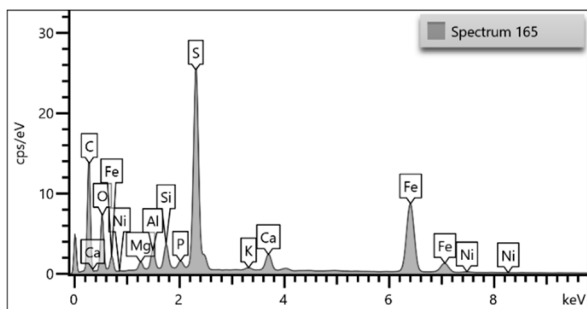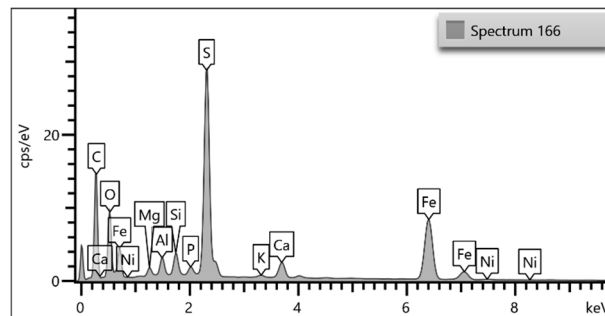

| Wt%     | C     | O     | Na | Mg   | Al   | Si   | P    | S    | Cl | K    | Ca   | Ti | Fe   | Ni   | Total |
|---------|-------|-------|----|------|------|------|------|------|----|------|------|----|------|------|-------|
| Sp. 165 | 18,58 | 63,17 |    | 0,27 | 0,56 | 0,63 | 0,21 | 5,93 |    | 0,09 | 0,75 |    | 9,65 | 0,15 | 100   |
| Sp. 166 | 18,68 | 63,7  |    | 0,28 | 0,52 | 0,59 | 0,23 | 6,31 |    | 0,09 | 0,75 |    | 8,73 | 0,12 | 100   |

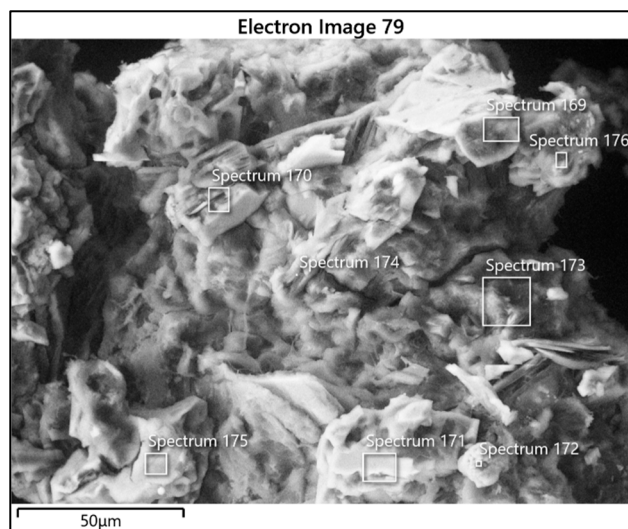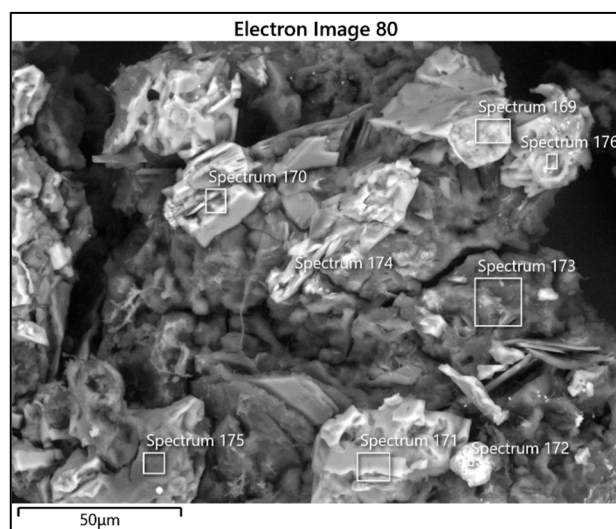

## SAMPLE 5

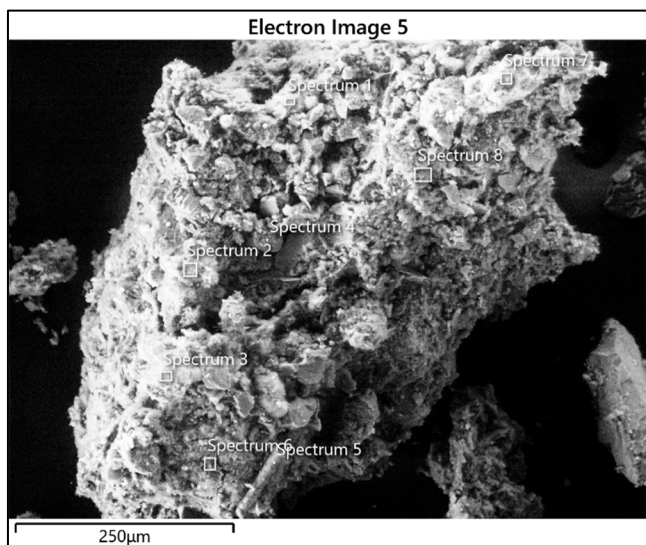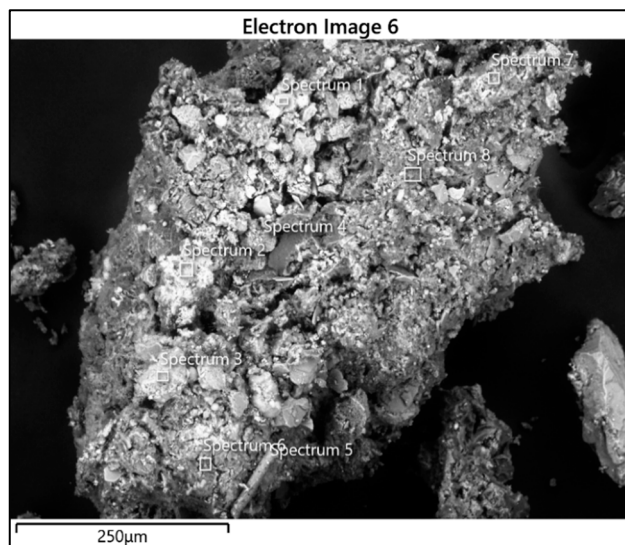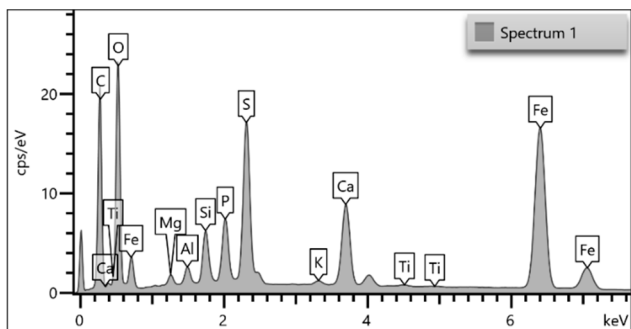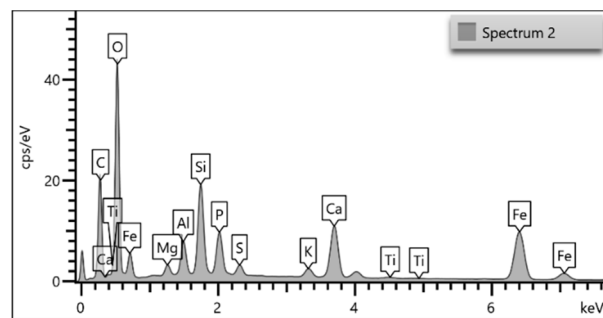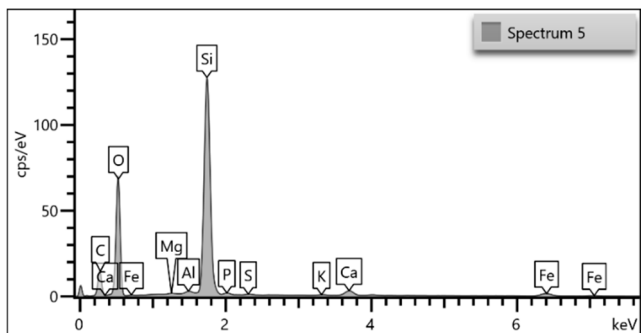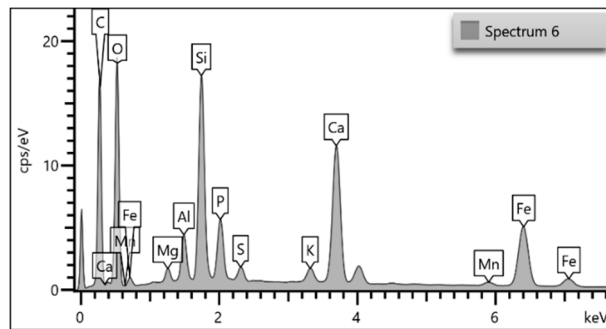

| Wt%   | C     | O     | Na | Mg   | Al   | Si    | P    | S    | K    | Ca   | Ti   | Mn   | Fe   | Total |
|-------|-------|-------|----|------|------|-------|------|------|------|------|------|------|------|-------|
| Sp. 1 | 17,85 | 59,97 |    | 0,23 | 0,31 | 0,86  | 1,17 | 2,99 | 0,11 | 2,36 | 0,06 |      | 14,1 | 100   |
| Sp. 2 | 18,71 | 61,64 |    | 0,48 | 1,25 | 3,11  | 1,71 | 0,43 | 0,46 | 3,21 | 0,08 |      | 8,93 | 100   |
| Sp. 5 | 16,31 | 64,15 |    | 0,06 | 0,17 | 17,13 | 0,2  | 0,08 | 0,07 | 0,72 |      |      | 1,11 | 100   |
| Sp. 6 | 19,25 | 62,59 |    | 0,34 | 0,92 | 3,76  | 1,34 | 0,31 | 0,41 | 4,68 |      | 0,33 | 6,07 | 100   |

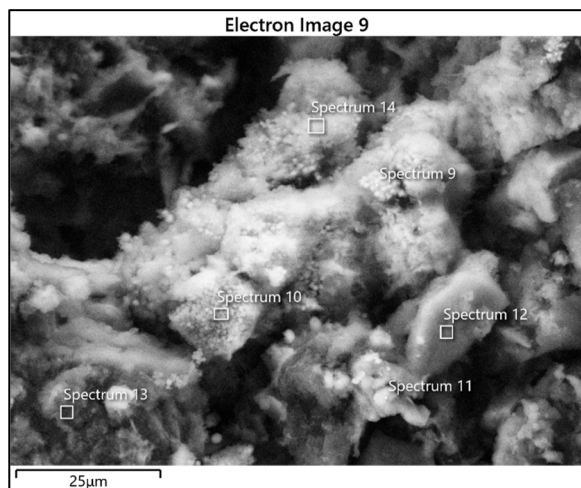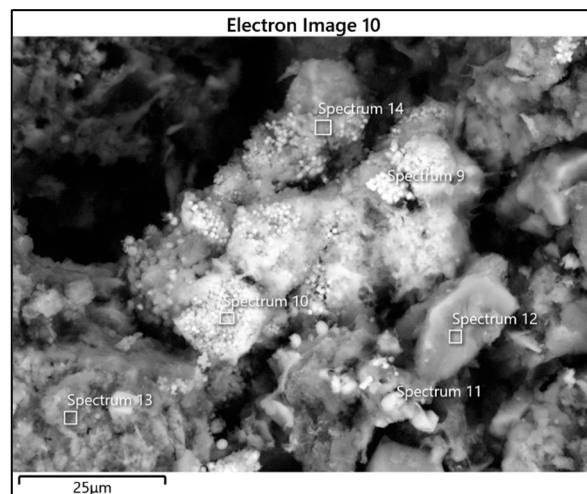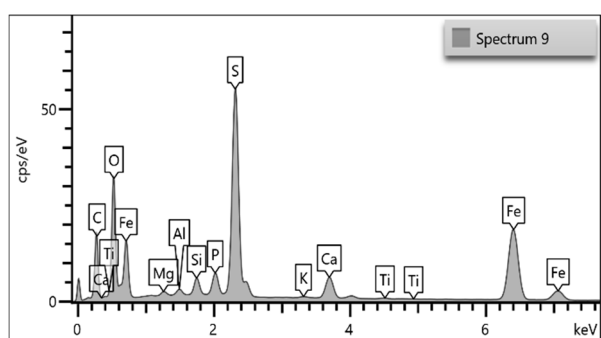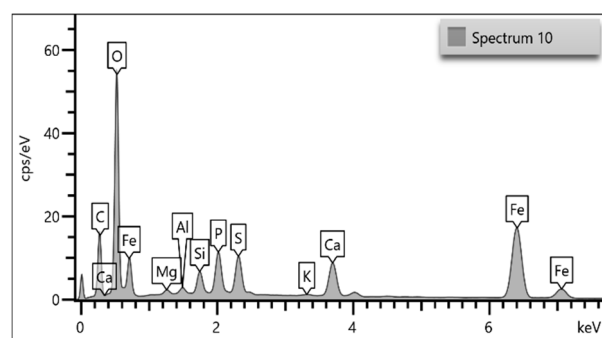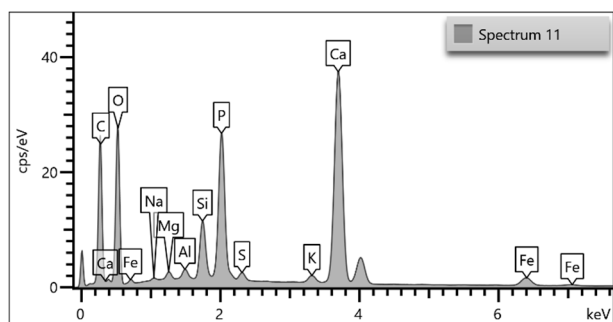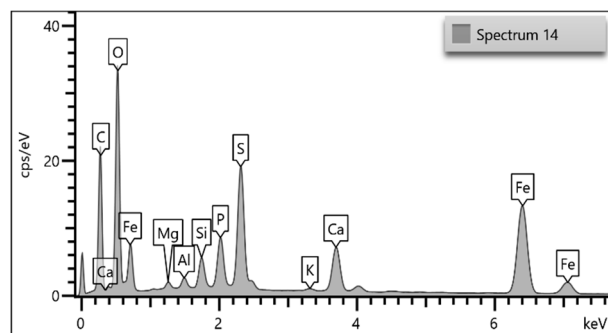

| Wt%    | C     | O     | Na  | Mg   | Al   | Si   | P     | S    | K    | Ca   | Ti   | Fe    | Total |
|--------|-------|-------|-----|------|------|------|-------|------|------|------|------|-------|-------|
| Sp. 9  | 15,76 | 60,18 |     | 0,17 | 0,2  | 0,57 | 0,82  | 7,95 | 0,07 | 1,29 | 0,07 | 12,91 | 100   |
| Sp. 10 | 16,51 | 57,56 |     | 0,28 | 0,3  | 1,04 | 2,18  | 2,05 | 0,07 | 2,73 |      | 17,28 | 100   |
| Sp. 11 | 0,93  | 50,26 | 0,3 | 0,65 | 0,65 | 3,87 | 11,44 | 0,71 | 0,79 | 27,5 |      | 2,9   | 100   |
| Sp. 14 | 18,78 | 61,98 |     | 0,21 | 0,27 | 0,72 | 1,33  | 3,34 | 0,09 | 1,89 |      | 11,39 | 100   |

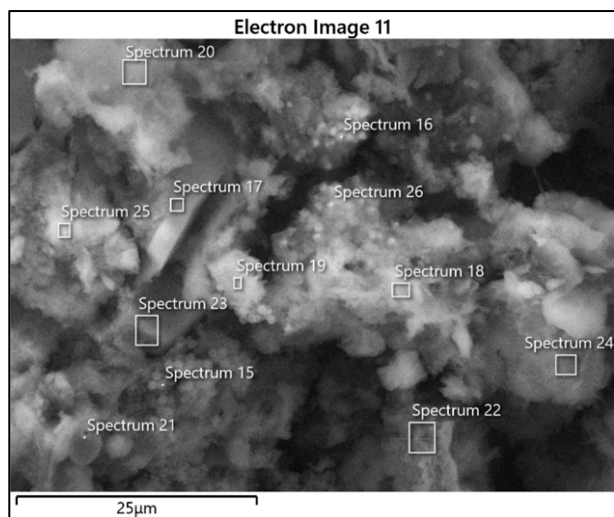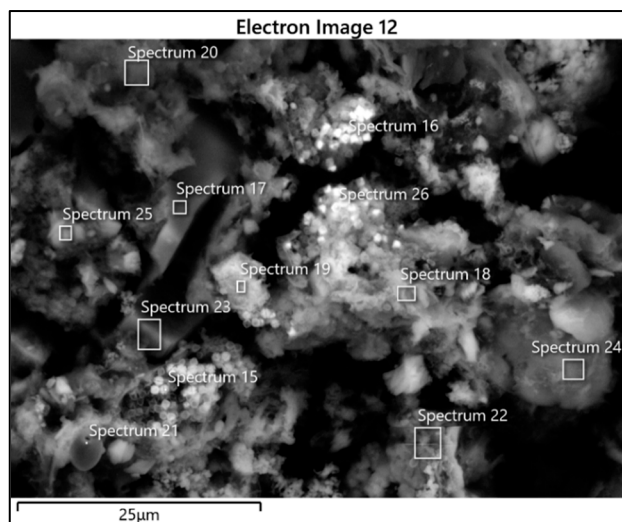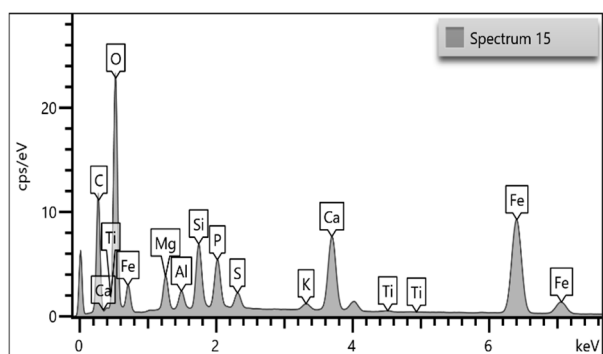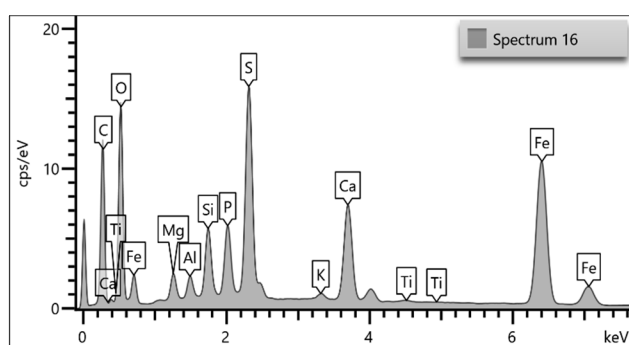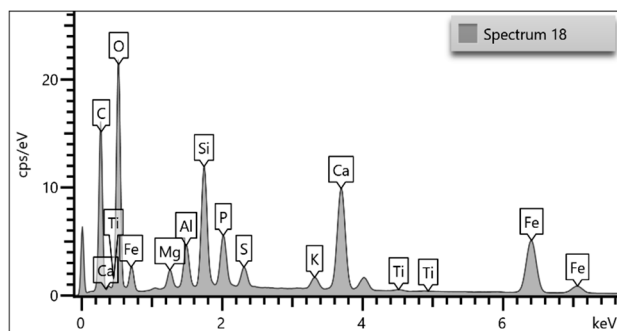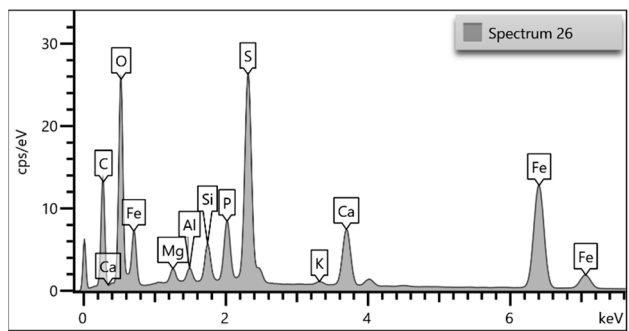

| Wt%    | C     | O     | Na | Mg   | Al   | Si   | P    | S    | K    | Ca    | Ti   | Fe    | Total |
|--------|-------|-------|----|------|------|------|------|------|------|-------|------|-------|-------|
| Sp. 15 | 17,65 | 58,79 |    | 1,29 | 0,56 | 1,85 | 1,59 | 0,51 | 0,26 | 3,64  | 0,07 | 13,78 | 100   |
| Sp. 16 | 16,92 | 59,74 |    | 0,59 | 0,41 | 1,14 | 1,34 | 4,01 | 0,15 | 2,88  | 0,06 | 12,75 | 100   |
| Sp. 18 | 1,19  | 46,37 |    | 1,7  | 3,24 | 8,64 | 4,41 | 1,74 | 1,3  | 12,45 | 0,25 | 18,71 | 100   |
| Sp. 26 | 16,48 | 60,04 |    | 0,41 | 0,35 | 0,85 | 1,55 | 5,38 | 0,12 | 2,31  |      | 12,52 | 100   |



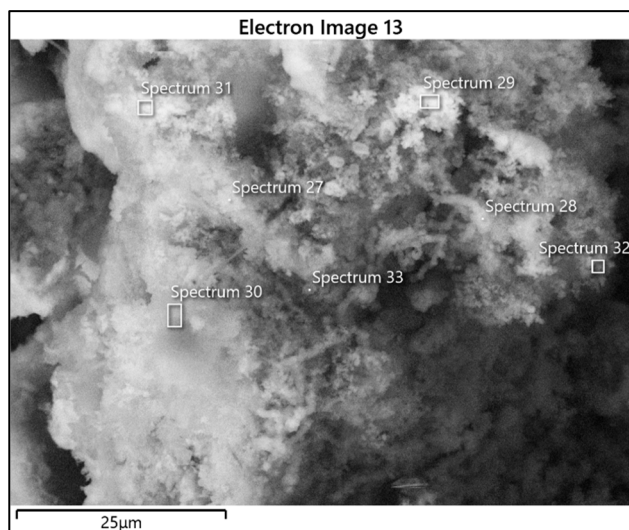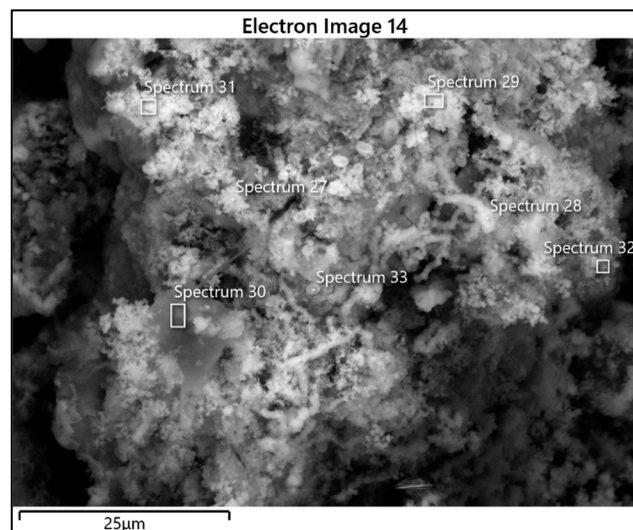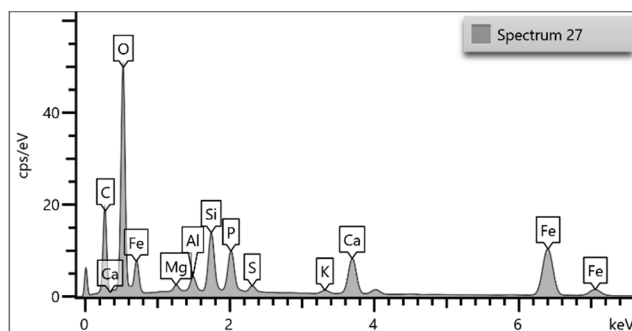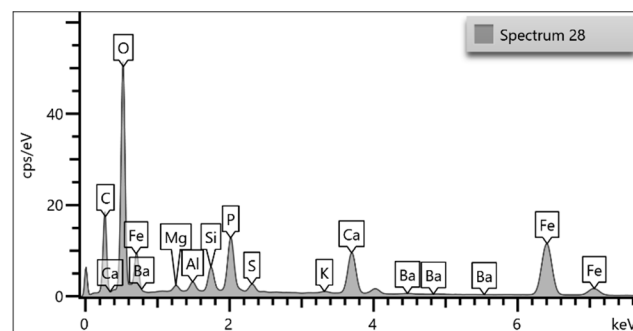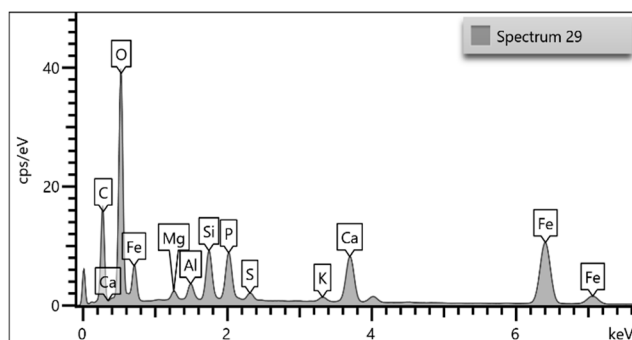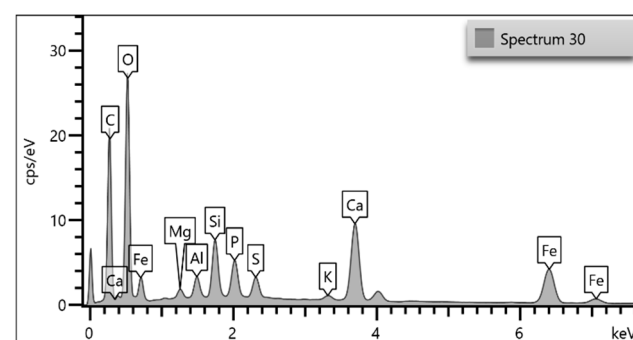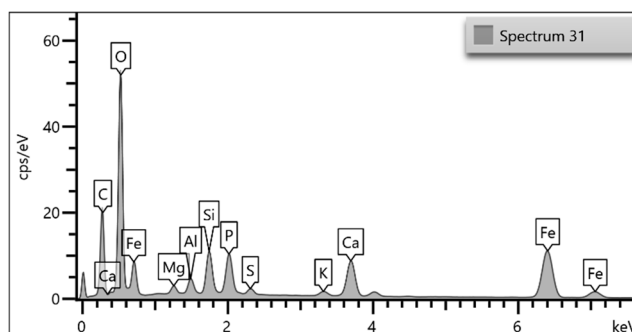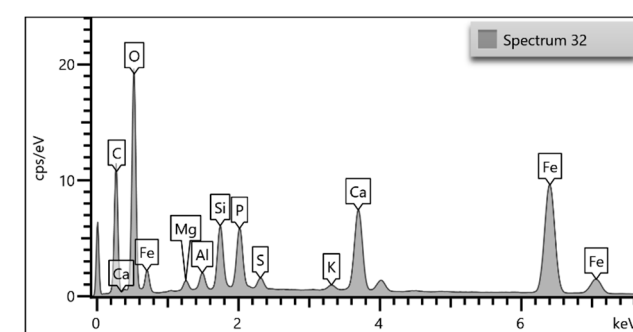

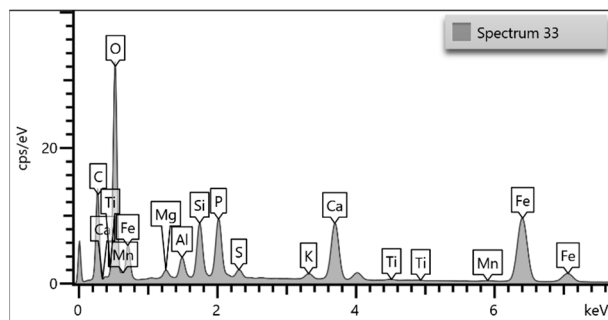

| Wt%    | C     | O     | Mg   | Al   | Si   | P    | S    | K    | Ca    | Ti   | Mn   | Fe    | Ba   | Total |
|--------|-------|-------|------|------|------|------|------|------|-------|------|------|-------|------|-------|
| Sp. 27 | 0,87  | 50,7  | 0,99 | 1,78 | 6,64 | 5,31 | 0,84 | 0,58 | 6,71  |      |      | 25,57 |      | 100   |
| Sp. 28 | 18,44 | 60,21 | 0,37 | 0,45 | 1,1  | 2,74 | 0,44 | 0,11 | 3,33  |      |      | 12,65 | 0,17 | 100   |
| Sp. 29 | 0,83  | 47,05 | 1,23 | 1,77 | 5,04 | 5,45 | 0,87 | 0,67 | 7,56  |      |      | 29,53 |      | 100   |
| Sp. 30 | 1,36  | 54,42 | 1,1  | 2,11 | 5,41 | 3,97 | 2,32 | 0,64 | 12,56 |      |      | 16,09 |      | 100   |
| Sp. 31 | 0,89  | 50,74 | 1,26 | 1,94 | 5,01 | 5,37 | 0,82 | 0,74 | 6,82  |      |      | 26,42 |      | 100   |
| Sp. 32 | 0,83  | 36,99 | 1,07 | 1,47 | 4,88 | 5,25 | 0,98 | 0,53 | 9,74  |      |      | 38,26 |      | 100   |
| Sp. 33 | 0,76  | 45,03 | 0,94 | 2,17 | 5,17 | 6,34 | 0,93 | 0,76 | 8,75  | 0,21 | 0,22 | 28,71 |      | 100   |

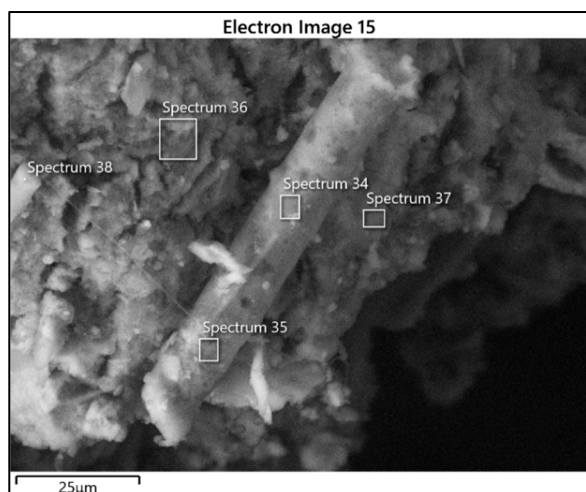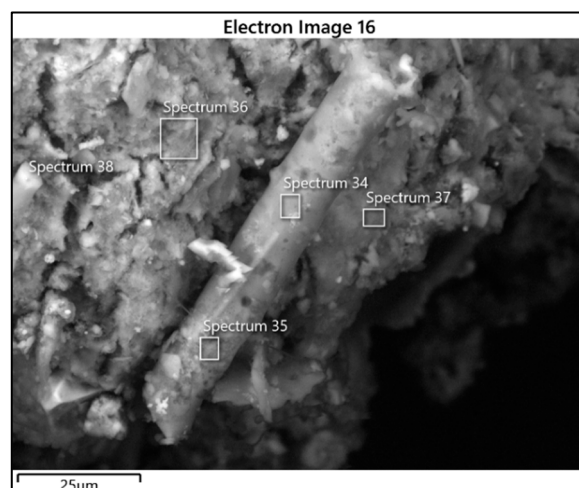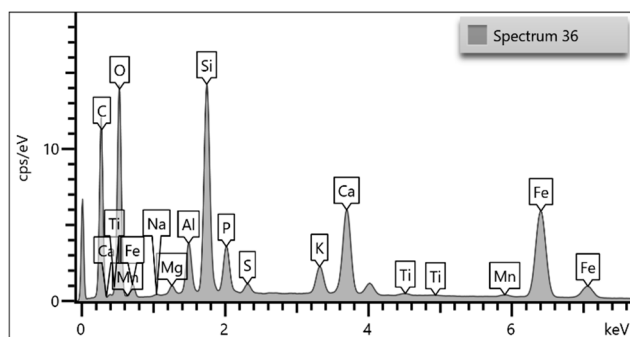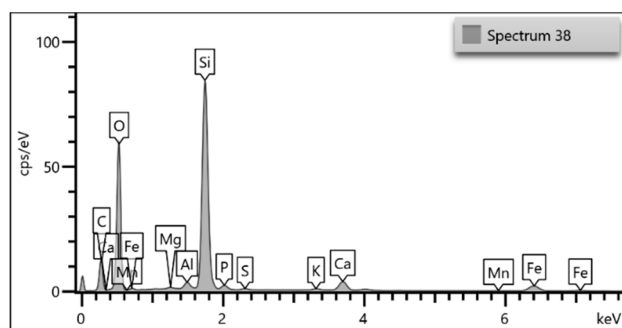

| Wt%    | C     | O     | Na   | Mg   | Al   | Si    | P    | S    | K    | Ca   | Ti  | Mn   | Fe   | Total |
|--------|-------|-------|------|------|------|-------|------|------|------|------|-----|------|------|-------|
| Sp. 36 | 18,44 | 61,01 | 0,06 | 0,22 | 1,09 | 4,19  | 1,09 | 0,22 | 0,87 | 3,08 | 0,1 | 0,19 | 9,44 | 100   |
| Sp. 38 | 0,72  | 56,05 |      | 0,24 | 0,95 | 32,59 | 1,03 | 0,3  | 0,4  | 2,9  |     | 0,19 | 4,62 | 100   |

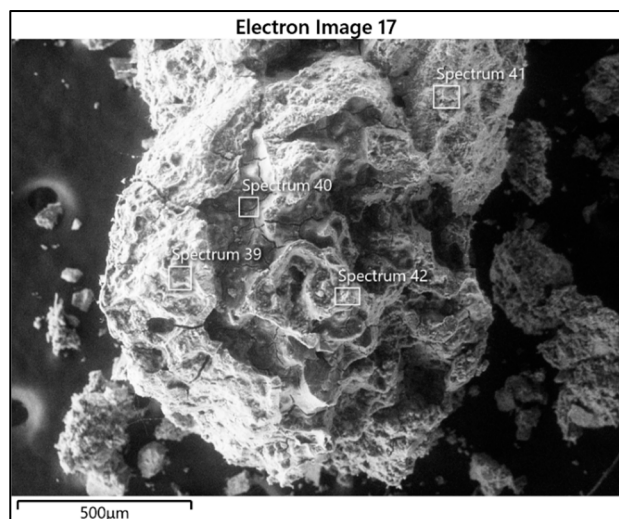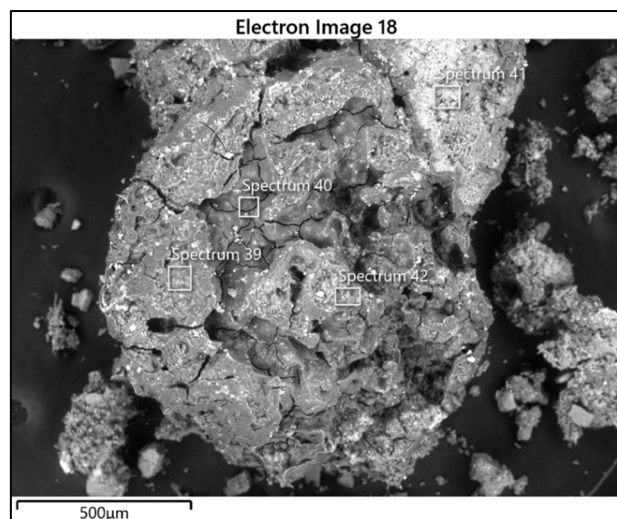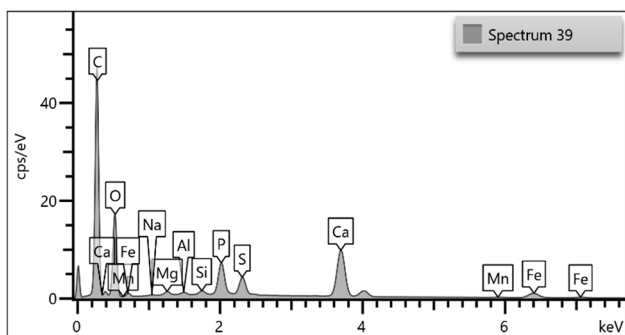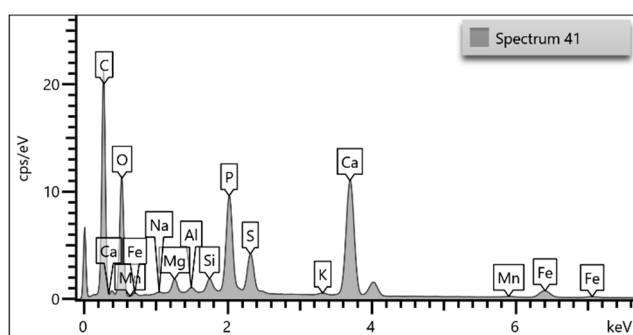

| Wt%    | C     | O     | Na   | Mg   | Al   | Si   | P     | S    | K    | Ca    | Mn   | Fe    | Total |
|--------|-------|-------|------|------|------|------|-------|------|------|-------|------|-------|-------|
| Sp. 39 | 24,69 | 69,73 | 0,04 | 0,13 | 0,08 | 0,1  | 1,09  | 0,63 |      | 2,7   | 0,05 | 0,77  | 100   |
| Sp. 41 | 2,38  | 51,14 | 0,28 | 1,76 | 0,53 | 1,23 | 11,01 | 4,95 | 0,31 | 22,43 | 0,29 | 3,7   | 100   |
| Sp. 42 | 3,44  | 54,58 |      | 0,89 | 0,88 | 1,58 | 5,99  | 4,81 | 0,24 | 16,86 |      | 10,72 | 100   |

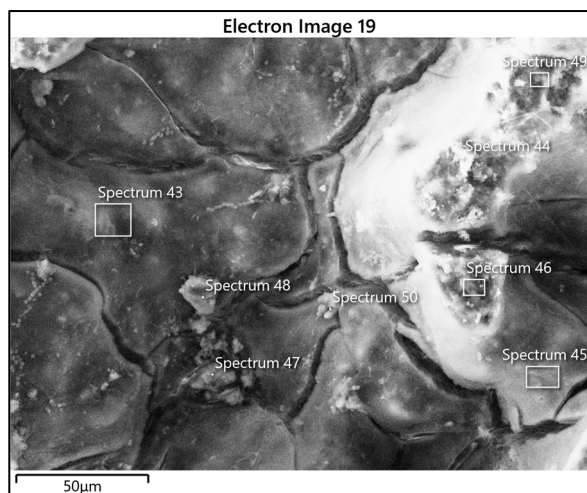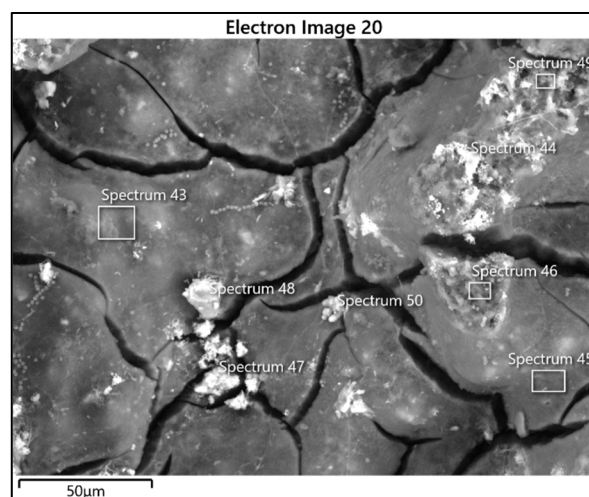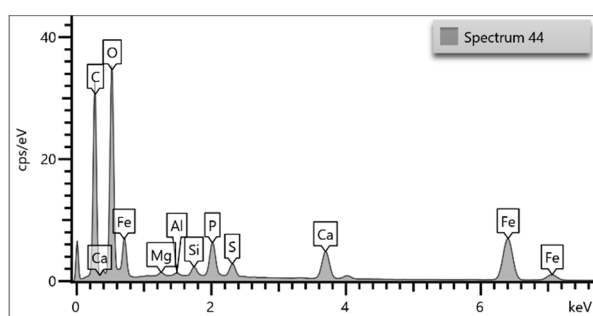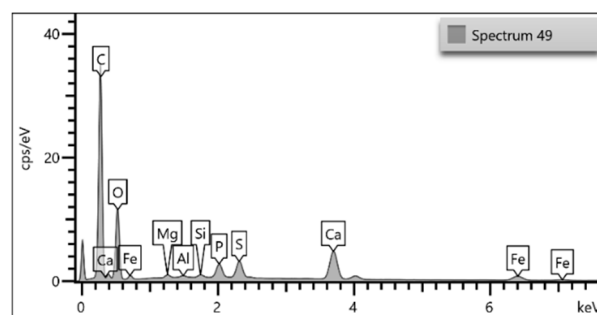

| Wt%    | C    | O     | Mg   | Al   | Si   | P    | S    | K | Ca    | Mn | Fe   | Total |
|--------|------|-------|------|------|------|------|------|---|-------|----|------|-------|
| Sp. 44 | 22,8 | 66,18 | 0,14 | 0,09 | 0,27 | 1,19 | 0,47 |   | 1,55  |    | 7,3  | 100   |
| Sp. 49 | 4,74 | 61,78 | 1,08 | 0,44 | 0,71 | 4,31 | 5,54 |   | 14,76 |    | 6,63 | 100   |



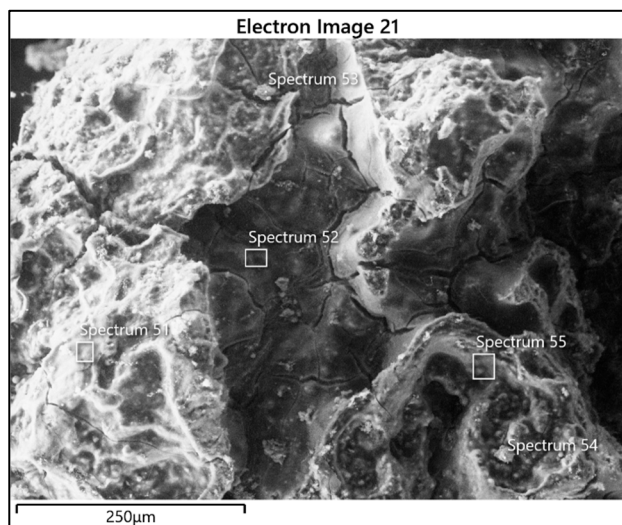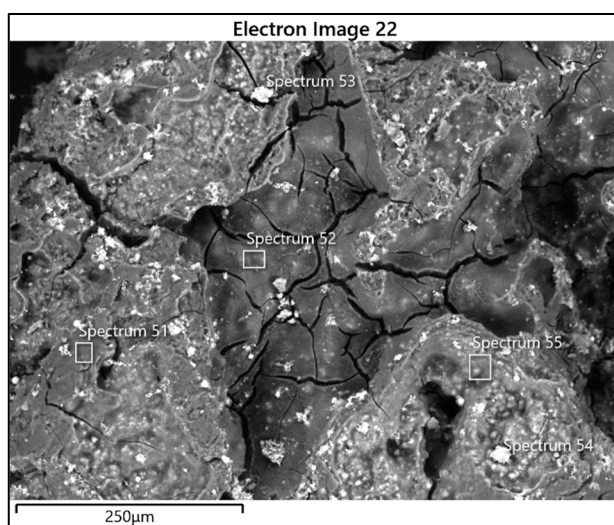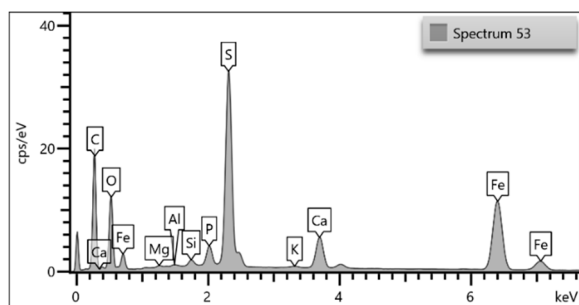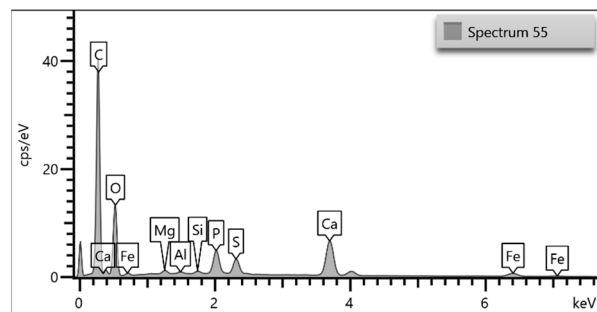

| Wt%    | C    | O     | Mg   | Al   | Si   | P    | S    | K    | Ca   | Fe   | Total |
|--------|------|-------|------|------|------|------|------|------|------|------|-------|
| Sp. 53 | 2,14 | 24,56 | 0,27 | 0,17 | 0,66 | 2,42 | 24,6 | 0,23 | 6,23 | 38,7 | 100   |
| Sp. 55 | 4,45 | 61,13 | 1,11 | 0,42 | 0,63 | 6,58 | 4,67 |      | 16,7 | 4,31 | 100   |

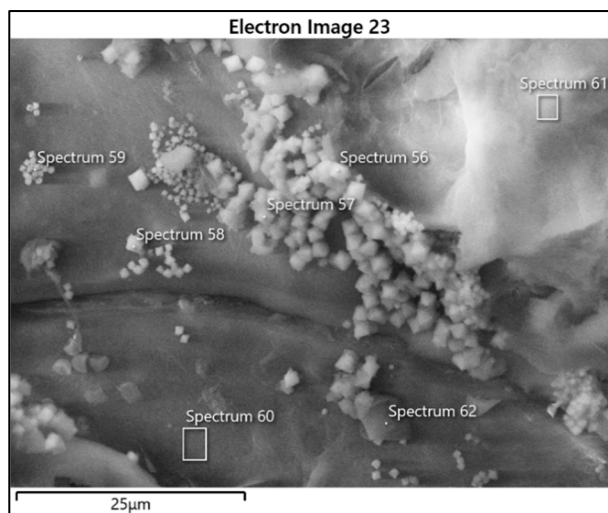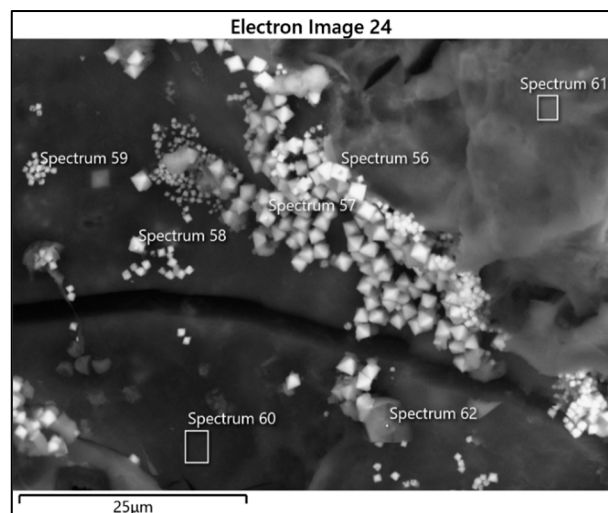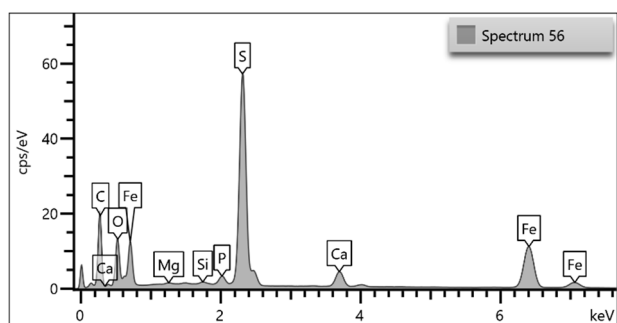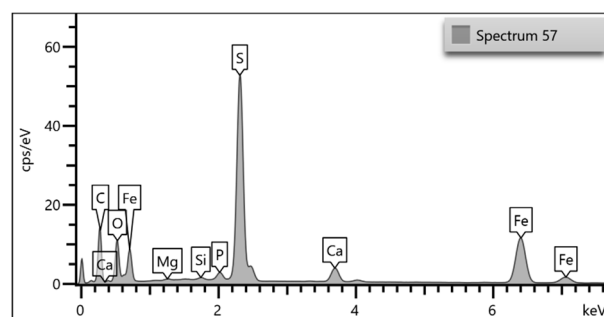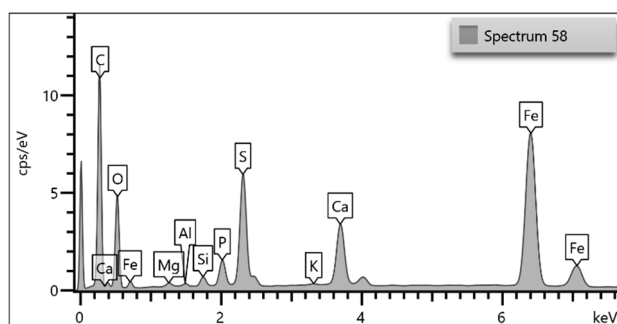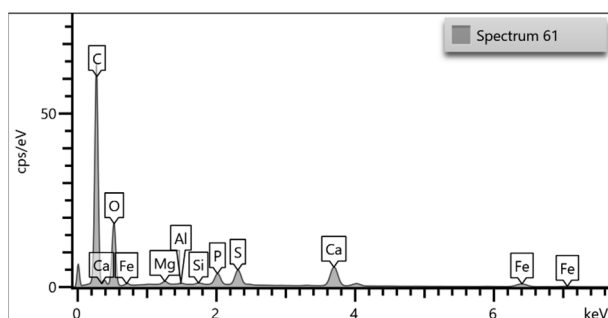

| Wt%    | C     | O     | Mg   | Al   | Si   | P    | S     | K    | Ca    | Mn | Fe    | Total |
|--------|-------|-------|------|------|------|------|-------|------|-------|----|-------|-------|
| Sp. 56 | 17,7  | 63,64 | 0,06 |      | 0,06 | 0,33 | 8,77  |      | 1,03  |    | 8,41  | 100   |
| Sp. 57 | 16,12 | 61,82 | 0,07 |      | 0,08 | 0,34 | 9,92  |      | 1,09  |    | 10,56 | 100   |
| Sp. 58 | 1,9   | 18,2  | 0,43 | 0,27 | 0,83 | 2,41 | 10,15 | 0,13 | 7,98  |    | 57,71 | 100   |
| Sp. 61 | 6,12  | 63,76 | 1,34 | 0,35 | 0,47 | 4,29 | 6,1   |      | 12,38 |    | 5,19  | 100   |

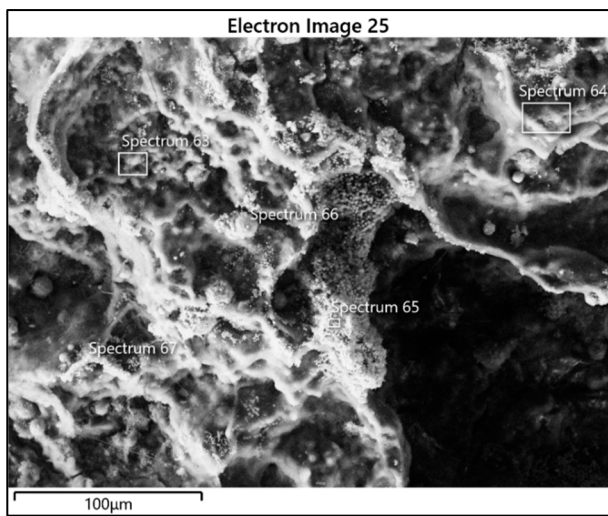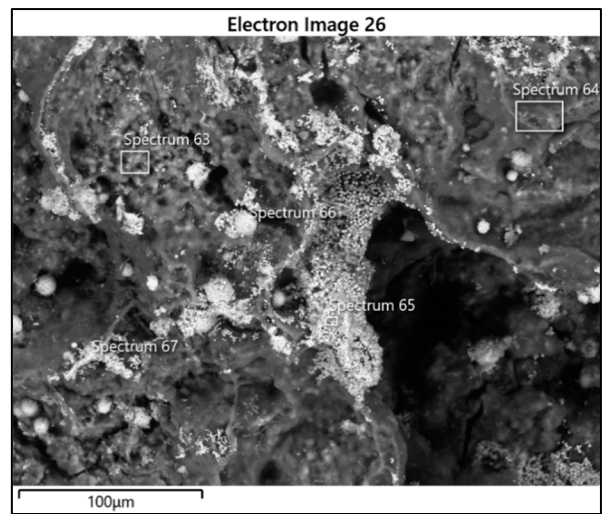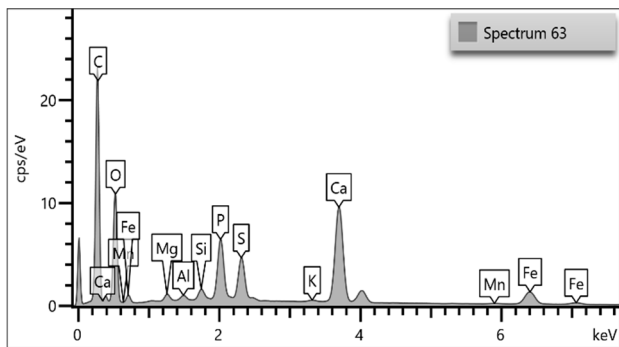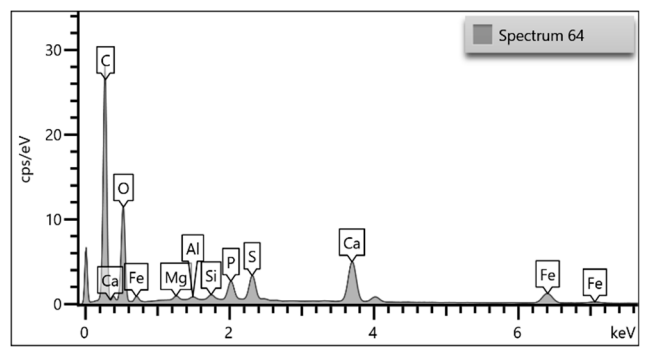

| Wt%    | C     | O     | Mg   | Al   | Si   | P    | S    | K    | Ca   | Mn   | Fe   | Total |
|--------|-------|-------|------|------|------|------|------|------|------|------|------|-------|
| Sp. 63 | 22,97 | 67,71 | 0,2  | 0,12 | 0,23 | 1,6  | 1,17 | 0,05 | 4,25 | 0,06 | 1,63 | 100   |
| Sp. 64 | 24,68 | 69,56 | 0,16 | 0,09 | 0,13 | 0,63 | 0,86 |      | 2,27 |      | 1,62 | 100   |

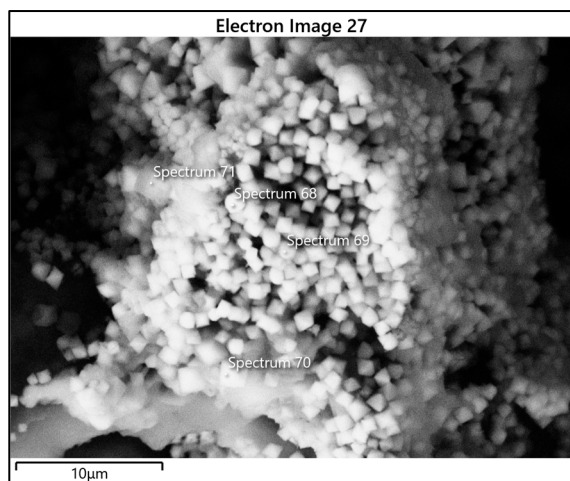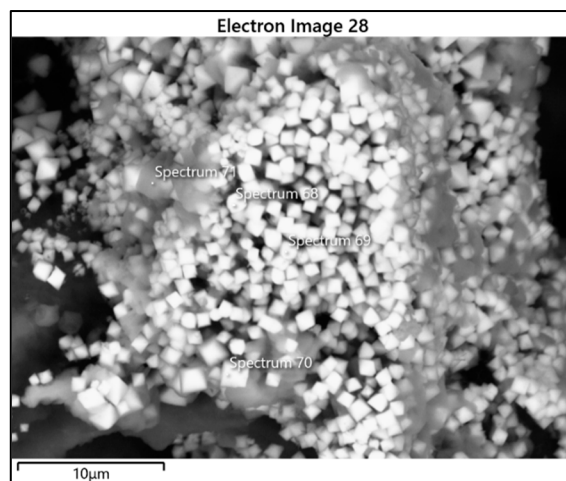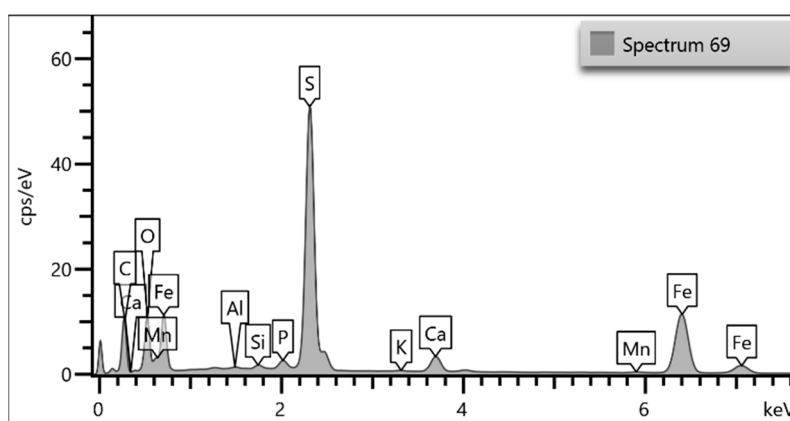

| Wt%    | C     | O     | Mg | Al   | Si   | P    | S     | K    | Ca   | Mn   | Fe    | Total |
|--------|-------|-------|----|------|------|------|-------|------|------|------|-------|-------|
| Sp. 69 | 15,09 | 60,74 |    | 0,06 | 0,13 | 0,32 | 10,77 | 0,05 | 1,01 | 0,14 | 11,69 | 100   |



SAMPLE 6

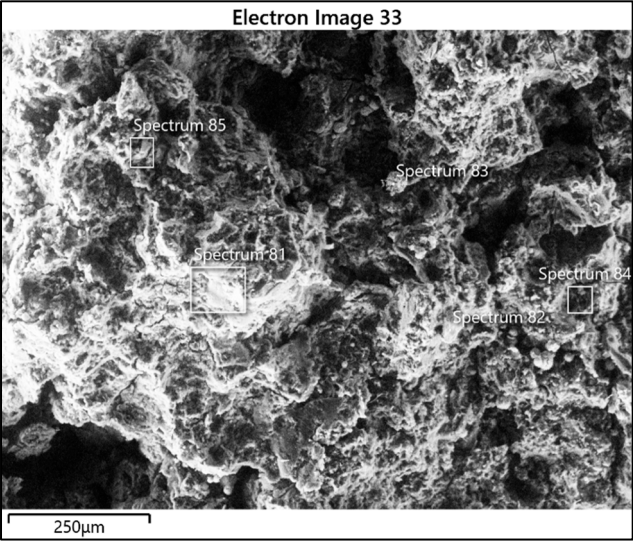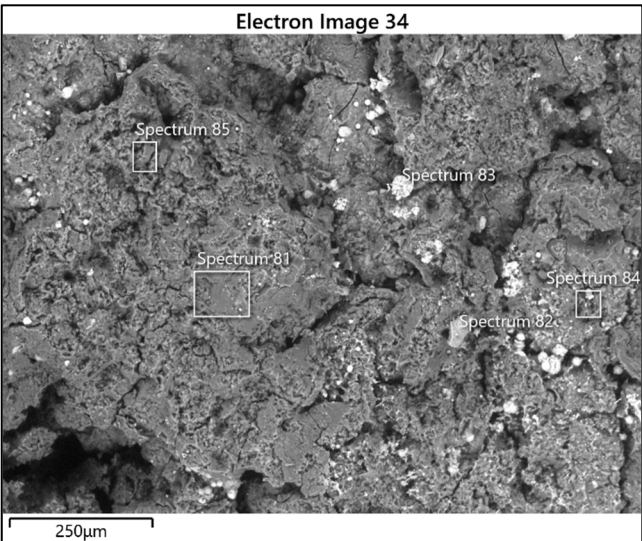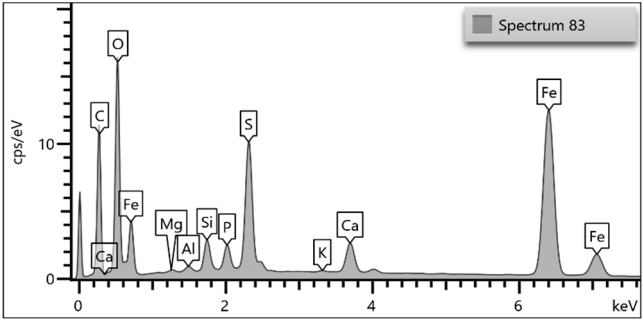

| Wt%    | C     | O     | Na | Mg   | Al   | Si   | P    | S    | K    | Ca   | Mn | Fe    | Total |
|--------|-------|-------|----|------|------|------|------|------|------|------|----|-------|-------|
| Sp. 83 | 17,29 | 58,23 |    | 0,06 | 0,11 | 0,66 | 0,61 | 3,11 | 0,05 | 1,09 |    | 18,79 | 100   |



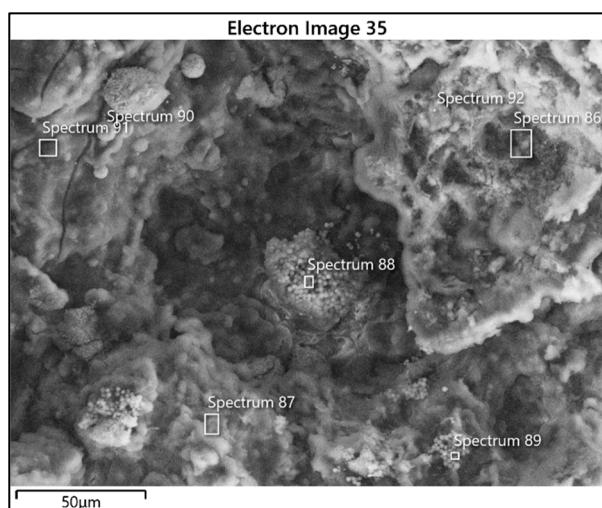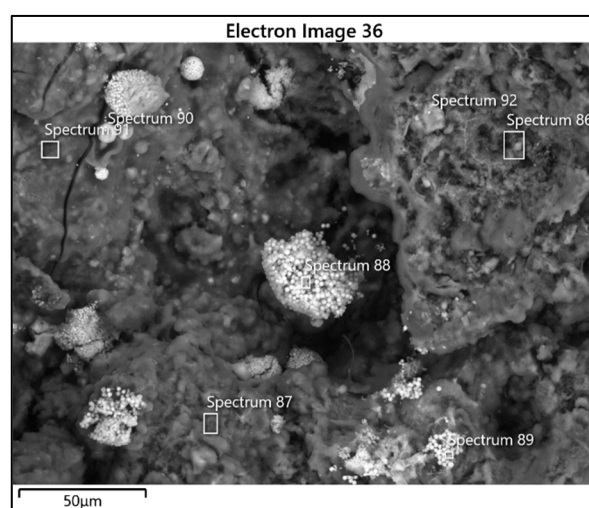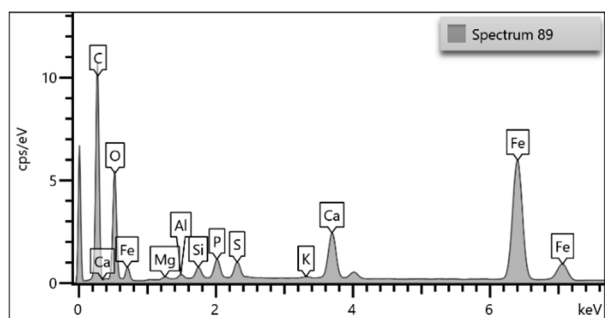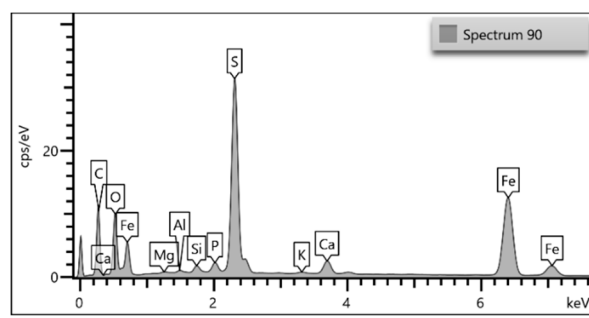

| Wt%    | C     | O     | Na | Mg   | Al   | Si   | P    | S    | K    | Ca   | Fe    | Total |
|--------|-------|-------|----|------|------|------|------|------|------|------|-------|-------|
| Sp. 89 | 1,9   | 23,67 |    | 0,44 | 0,59 | 1,3  | 2,4  | 1,95 | 0,25 | 7,75 | 59,74 | 100   |
| Sp. 90 | 16,18 | 59,9  |    | 0,05 | 0,08 | 0,22 | 0,36 | 7,64 | 0,07 | 0,82 | 14,68 | 100   |

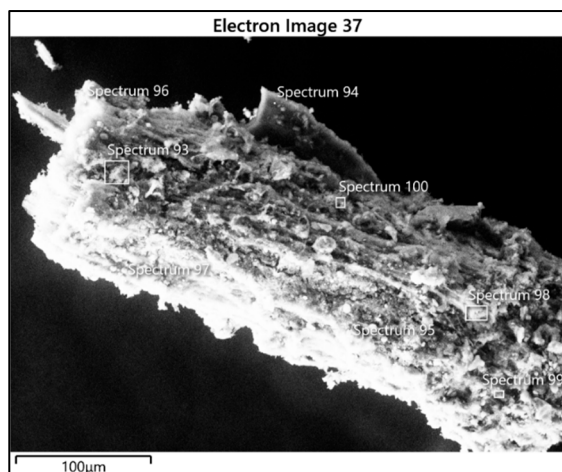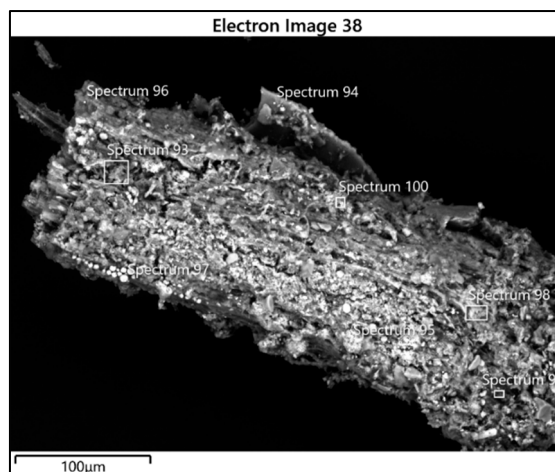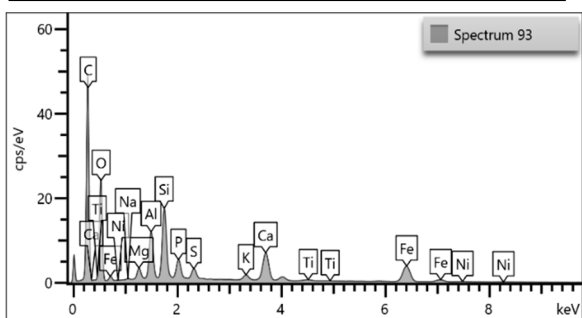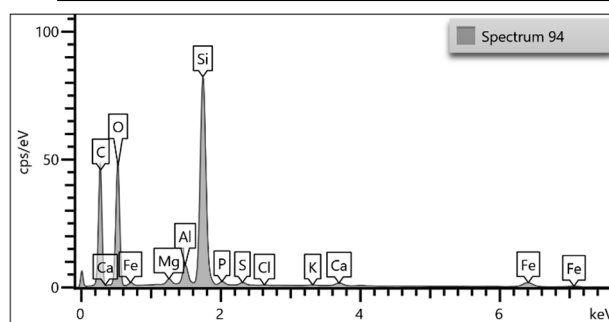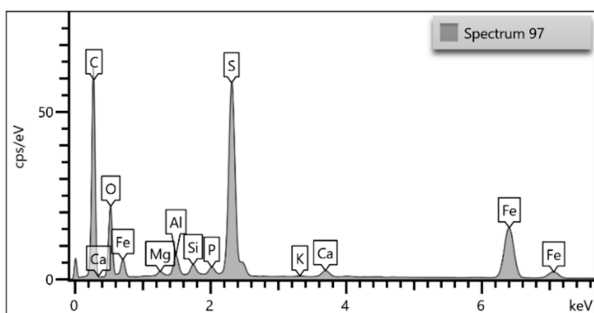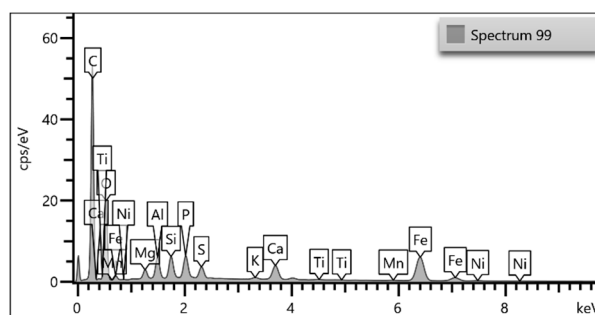

| Wt%    | C     | O     | Na   | Mg   | Al   | Si   | P    | S    | Cl   | K    | Ca   | Ti   | Mn   | Fe   | Ni   | Ba | Total |
|--------|-------|-------|------|------|------|------|------|------|------|------|------|------|------|------|------|----|-------|
| Sp. 93 | 23,33 | 68,21 | 0,05 | 0,36 | 1,34 | 1,85 | 0,57 | 0,32 |      | 0,21 | 1,34 | 0,06 |      | 2,31 | 0,06 |    | 100   |
| Sp. 94 | 22,21 | 68,58 |      | 0,23 | 0,67 | 7,04 | 0,15 | 0,11 | 0,03 | 0,03 | 0,18 |      |      | 0,77 |      |    | 100   |
| Sp. 97 | 21,81 | 67,18 |      | 0,1  | 0,43 | 0,19 | 0,16 | 4,35 |      | 0    | 0,22 |      |      | 5,56 |      |    | 100   |
| Sp. 99 | 24,11 | 68,6  |      | 0,32 | 0,64 | 0,61 | 0,7  | 0,38 |      | 0,07 | 0,71 | 0,03 | 0,04 | 3,69 | 0,08 |    | 100   |

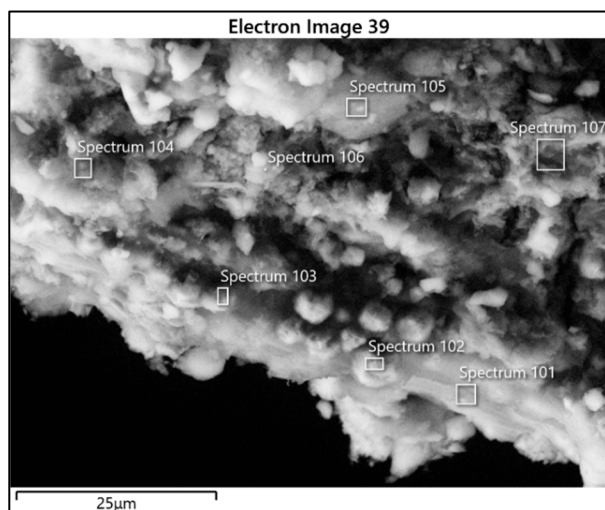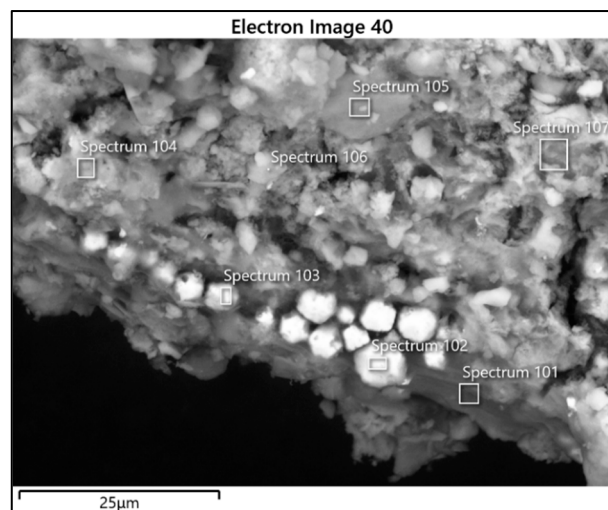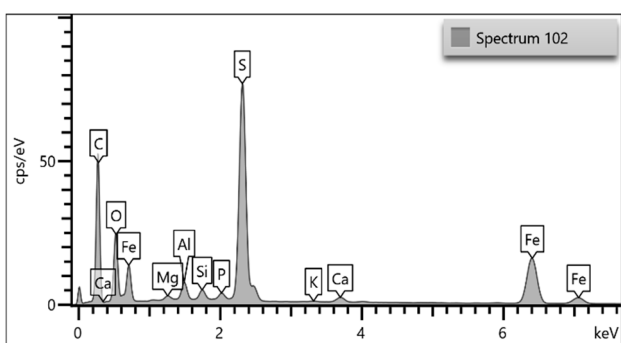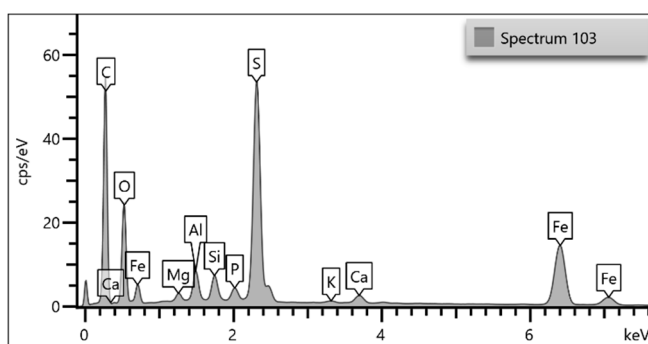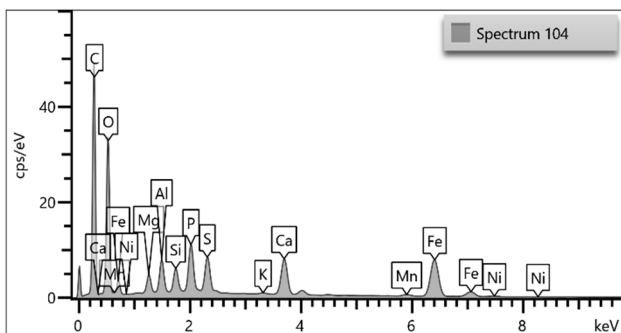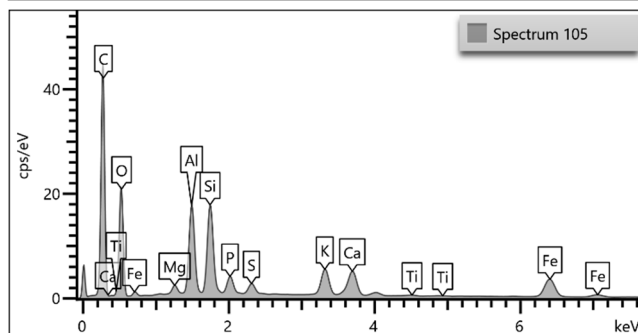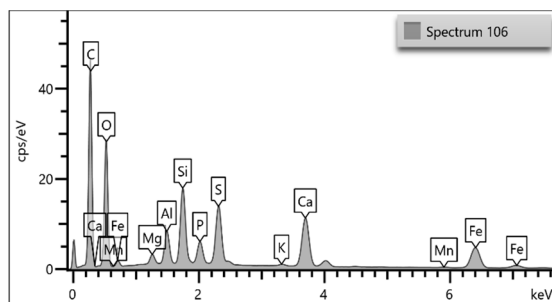

| Wt%     | C     | O     | Na | Mg   | Al   | Si   | P    | S    | K    | Ca    | Ti   | Mn   | Fe    | Ni  | Total |
|---------|-------|-------|----|------|------|------|------|------|------|-------|------|------|-------|-----|-------|
| Sp. 102 | 20,58 | 66,35 |    | 0,11 | 0,45 | 0,22 | 0,17 | 5,85 | 0,03 | 0,21  |      |      | 6,04  |     | 100   |
| Sp. 103 | 21,36 | 66,69 |    | 0,18 | 0,56 | 0,43 | 0,24 | 4,4  | 0,05 | 0,25  |      |      | 5,85  |     | 100   |
| Sp. 104 | 3,01  | 44,18 |    | 2,83 | 4,37 | 2,91 | 6,6  | 5,12 | 0,23 | 7,43  |      | 0,82 | 21,99 | 0,5 | 100   |
| Sp. 105 | 22,92 | 67,7  |    | 0,24 | 2,14 | 2,03 | 0,45 | 0,27 | 0,96 | 1     | 0,05 |      | 2,24  |     | 100   |
| Sp. 106 | 3,15  | 45,87 |    | 1,39 | 4,16 | 9,15 | 3,29 | 8,61 | 0,33 | 10,75 |      | 0,35 | 12,94 |     | 100   |

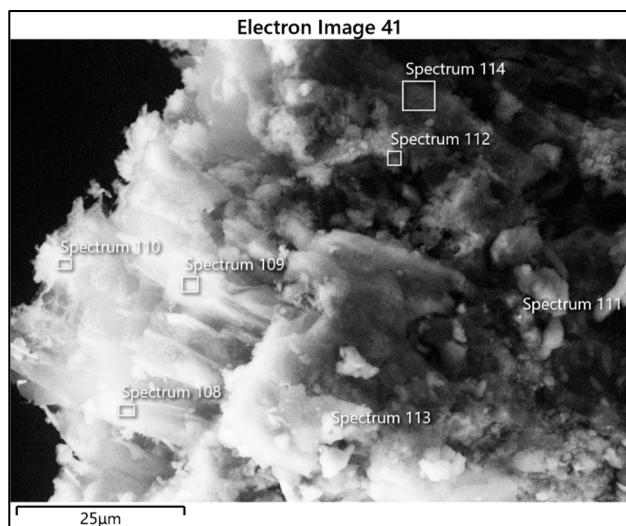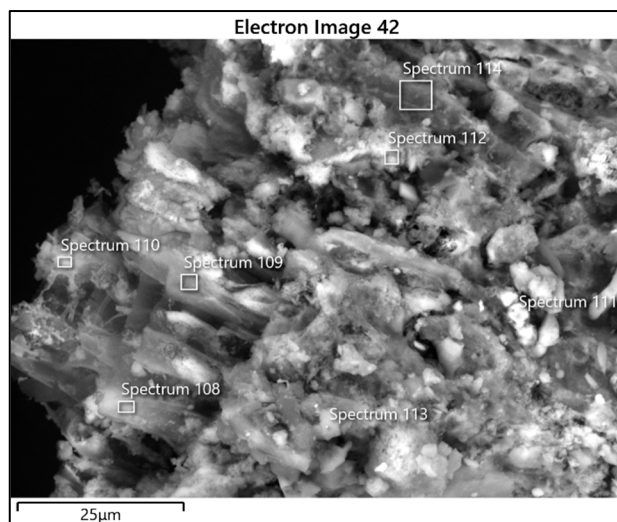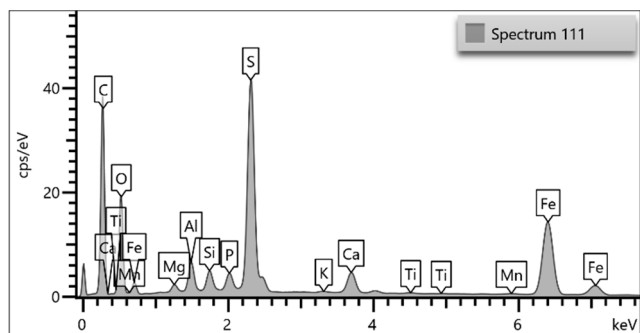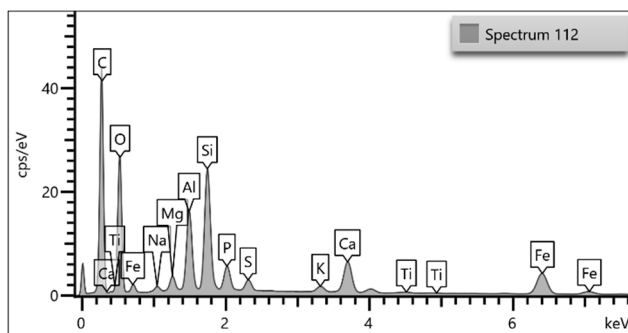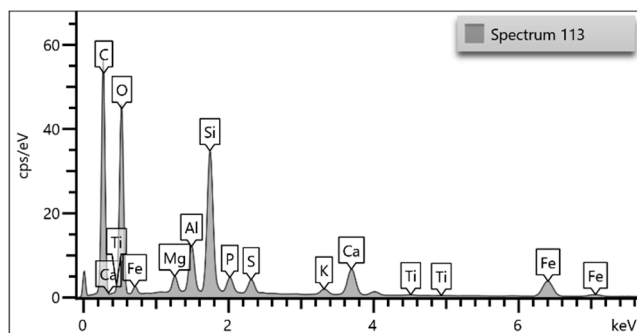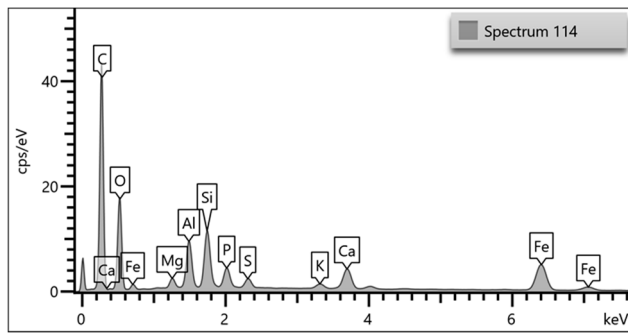

| Wt%     | C     | O     | Na   | Mg   | Al   | Si    | P    | S    | K    | Ca   | Ti   | Mn   | Fe    | Ba | Total |
|---------|-------|-------|------|------|------|-------|------|------|------|------|------|------|-------|----|-------|
| Sp. 111 | 20,45 | 65,2  |      | 0,17 | 0,6  | 0,37  | 0,35 | 4,49 | 0,03 | 0,69 | 0,04 | 0,05 | 7,56  |    | 100   |
| Sp. 112 | 3,39  | 43,32 | 0,88 | 1,95 | 9,47 | 14,97 | 3,85 | 1,73 | 1,08 | 6,61 | 0,19 |      | 12,58 |    | 100   |
| Sp. 113 | 3,22  | 52,49 |      | 2,17 | 5,42 | 16,42 | 2,31 | 2,09 | 1,05 | 5,44 | 0,24 |      | 9,15  |    | 100   |
| Sp. 114 | 4,44  | 39,08 |      | 2,1  | 8,58 | 10,23 | 4,27 | 2,01 | 1,21 | 5,94 |      |      | 22,14 |    | 100   |



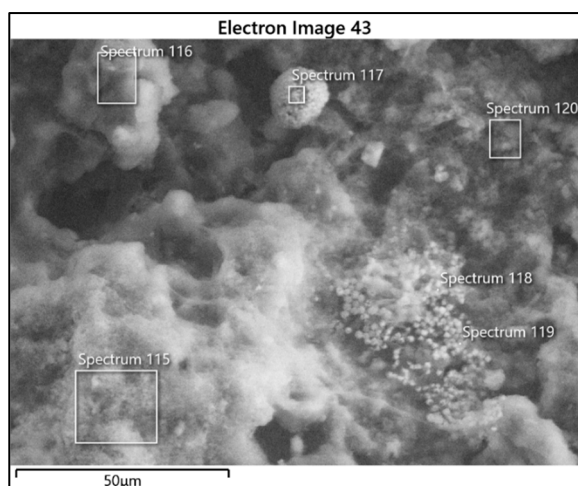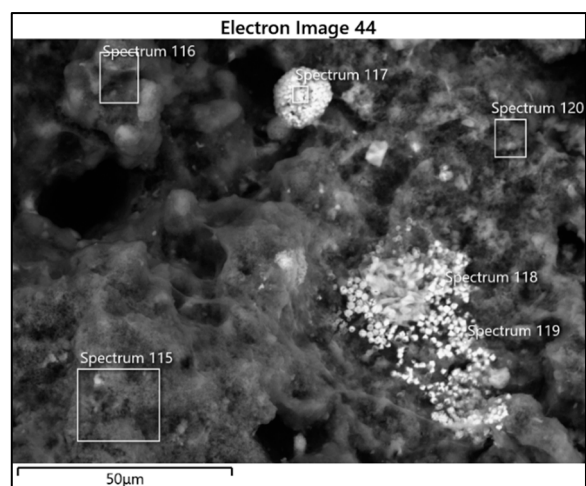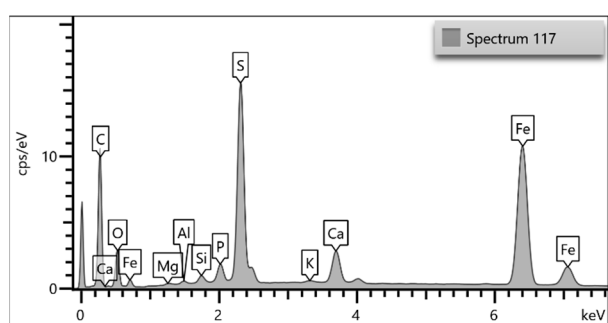

| Wt%     | C     | O     | Mg   | Al   | Si   | P    | S    | Cl | K    | Ca   | Mn | Fe    | Total |
|---------|-------|-------|------|------|------|------|------|----|------|------|----|-------|-------|
| Sp. 117 | 17,32 | 59,47 | 0,04 | 0,07 | 0,15 | 0,43 | 4,89 |    | 0,05 | 1,22 |    | 16,36 | 100   |

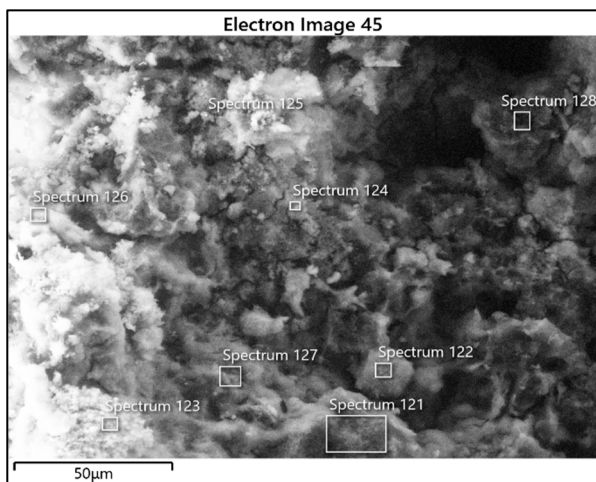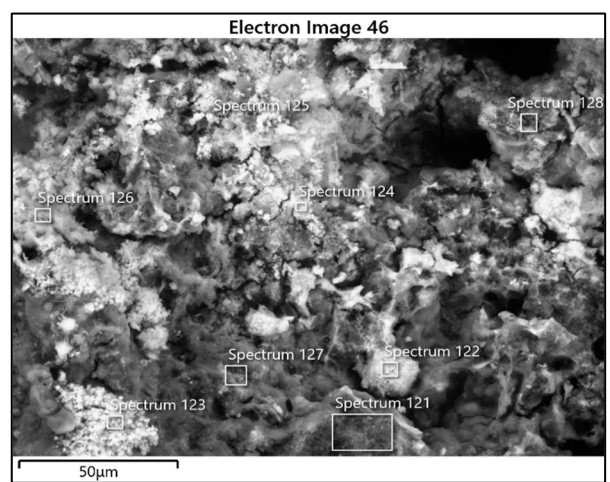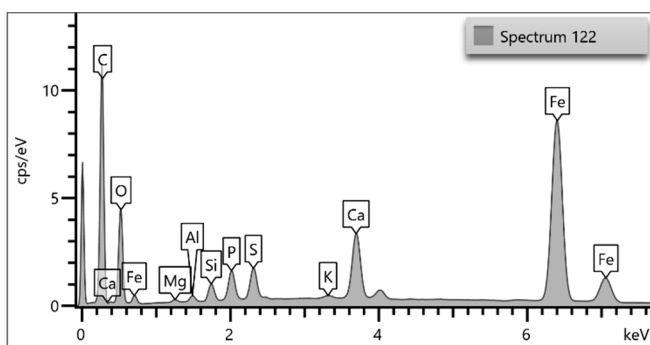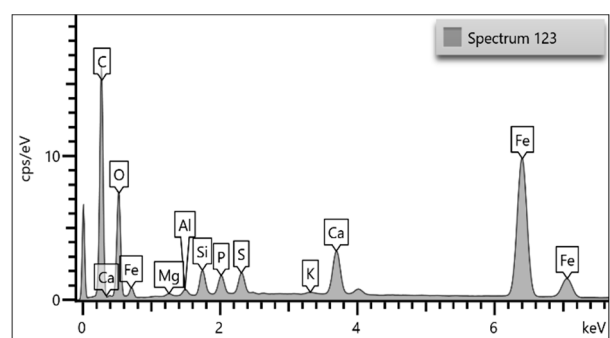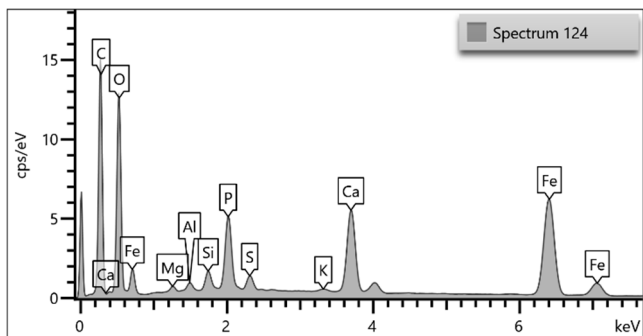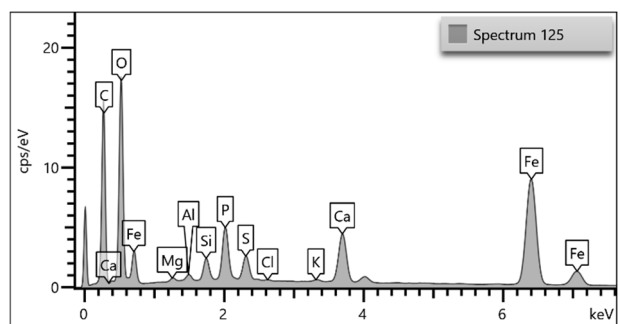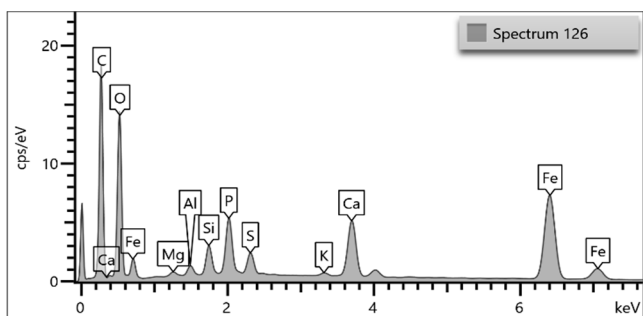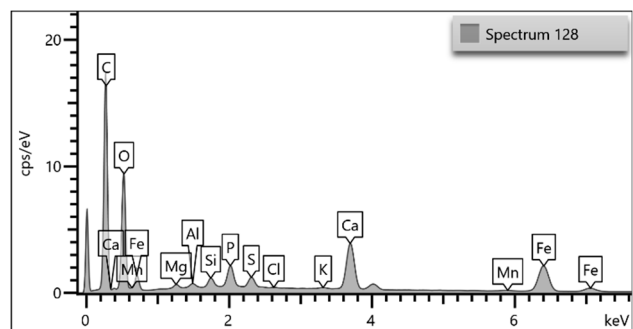

| Wt%     | C     | O     | Mg   | Al   | Si   | P    | S    | Cl   | K    | Ca    | Mn   | Fe    | Total |
|---------|-------|-------|------|------|------|------|------|------|------|-------|------|-------|-------|
| Sp. 122 | 19,18 | 59,26 | 0,07 | 0,13 | 0,33 | 0,6  | 0,64 |      | 0,07 | 2,08  |      | 17,64 | 100   |
| Sp. 123 | 1,94  | 20,66 | 0,39 | 0,75 | 2,73 | 2,19 | 2,42 |      | 0,21 | 6,63  |      | 62,08 | 100   |
| Sp. 124 | 1,61  | 38,02 | 0,68 | 0,74 | 1,58 | 6,8  | 1,44 |      | 0,27 | 10,96 |      | 37,9  | 100   |
| Sp. 125 | 19,82 | 61,28 | 0,11 | 0,16 | 0,53 | 1,44 | 0,68 | 0,04 | 0,08 | 2,07  |      | 13,81 | 100   |
| Sp. 126 | 1,87  | 36,24 | 0,5  | 1,08 | 2,97 | 6,23 | 2,53 |      | 0,46 | 8,94  |      | 39,19 | 100   |
| Sp. 128 | 2,81  | 51,61 | 0,89 | 0,68 | 1,57 | 4,06 | 2    | 0,16 | 0,26 | 13,48 | 0,42 | 22,06 | 100   |

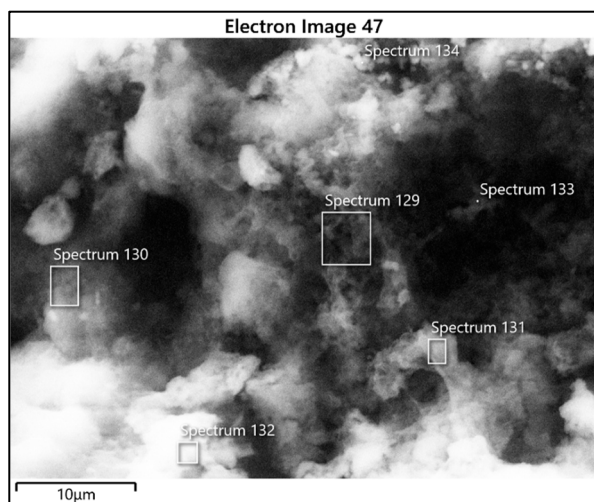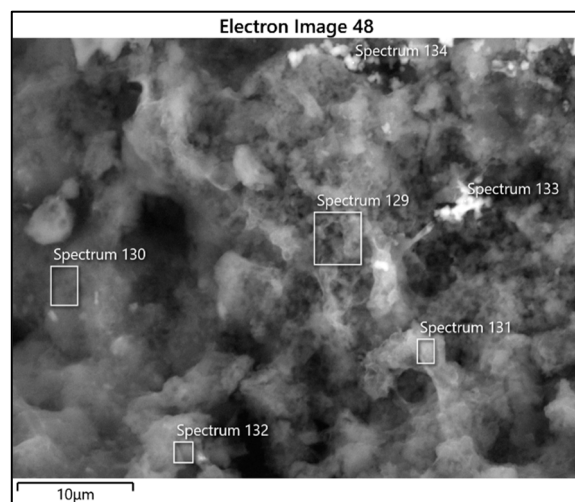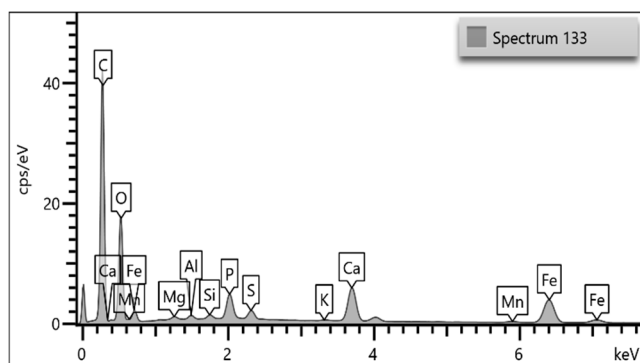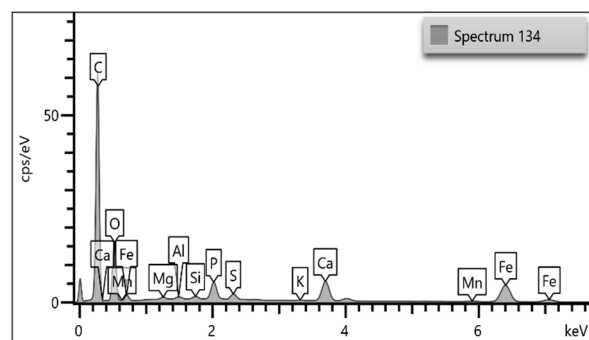

| Wt%     | C    | O     | Mg   | Al   | Si   | P    | S    | Cl | K    | Ca    | Mn   | Fe    | Total |
|---------|------|-------|------|------|------|------|------|----|------|-------|------|-------|-------|
| Sp. 133 | 3,89 | 50,74 | 0,71 | 0,9  | 0,78 | 5,49 | 2,06 |    | 0,23 | 11,42 | 0,8  | 22,98 | 100   |
| Sp. 134 | 5,79 | 46,12 | 0,97 | 0,67 | 0,82 | 6,01 | 2,07 |    | 0,2  | 10,42 | 0,74 | 26,17 | 100   |

## SAMPLE 7

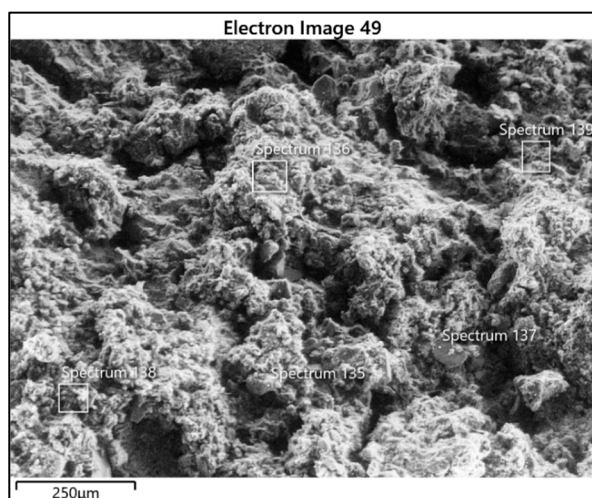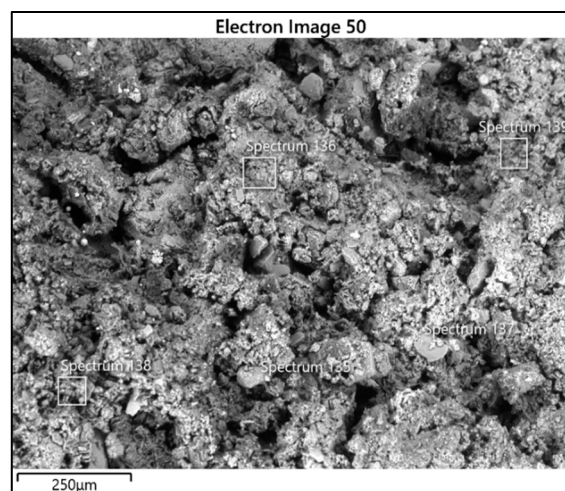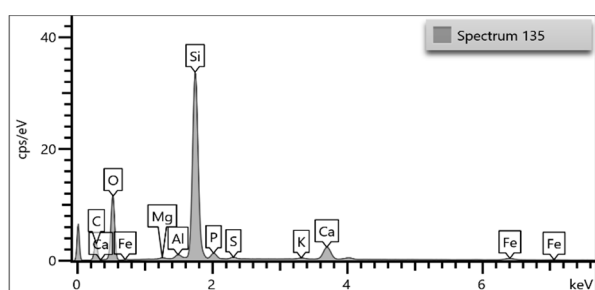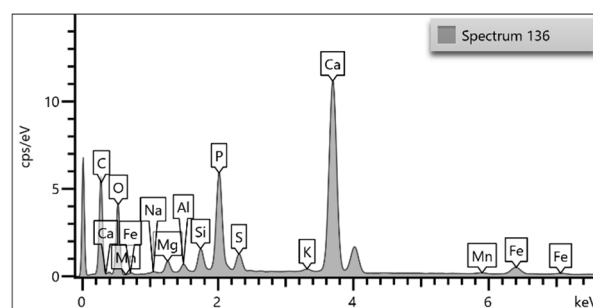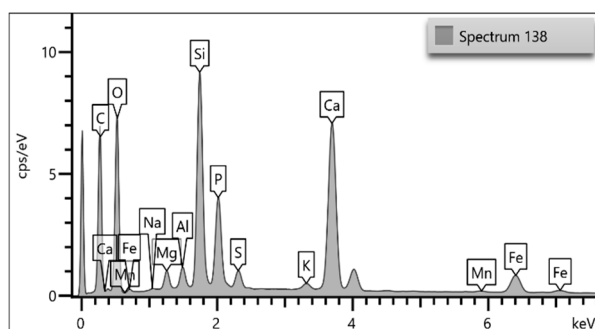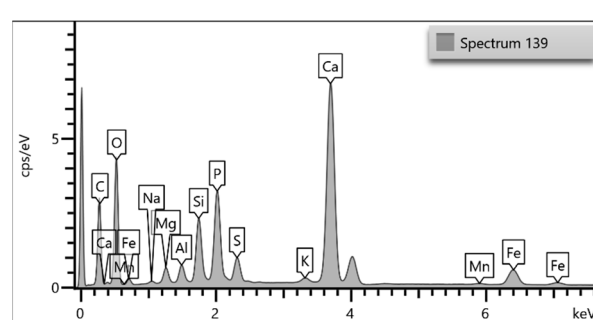

| Wt%     | C     | O     | Na   | Mg   | Al   | Si   | P     | S    | K    | Ca    | Ti | Mn   | Fe   | Total |
|---------|-------|-------|------|------|------|------|-------|------|------|-------|----|------|------|-------|
| Sp. 135 | 14,42 | 62,28 |      | 0,11 | 0,35 | 18,3 | 0,79  | 0,24 | 0,2  | 2,42  |    |      | 0,89 | 100   |
| Sp. 136 | 0,89  | 40,5  | 0,22 | 1,43 | 0,79 | 2,16 | 10,94 | 2,23 | 0,42 | 36,22 |    | 0,44 | 3,75 | 100   |
| Sp. 138 | 18,88 | 63,42 | 0    | 0,5  | 0,47 | 4,61 | 2,31  | 0,48 | 0,21 | 6,88  |    | 0,13 | 2,11 | 100   |



|         |      |       |      |      |      |     |      |      |      |       |  |      |      |     |
|---------|------|-------|------|------|------|-----|------|------|------|-------|--|------|------|-----|
| Sp. 139 | 0,62 | 45,04 | 0,34 | 1,44 | 1,42 | 4,8 | 8,06 | 2,38 | 0,52 | 28,62 |  | 0,42 | 6,35 | 100 |
|---------|------|-------|------|------|------|-----|------|------|------|-------|--|------|------|-----|

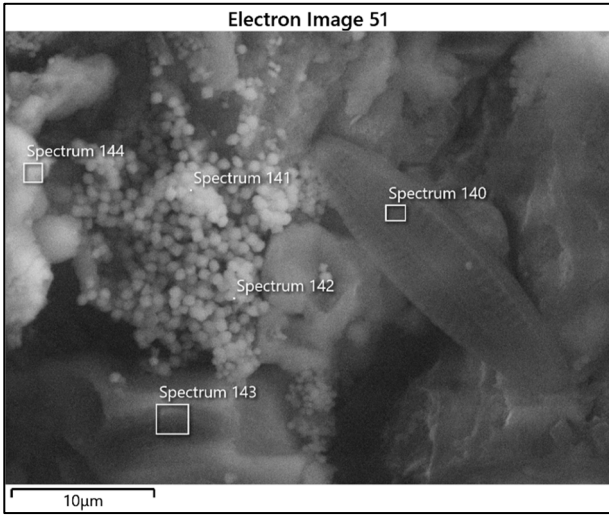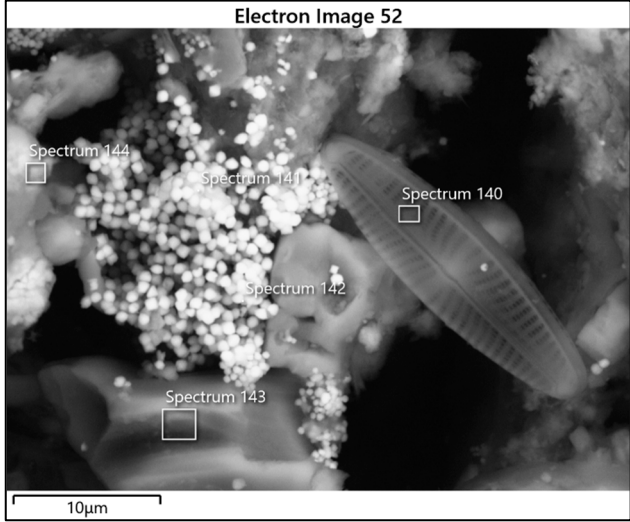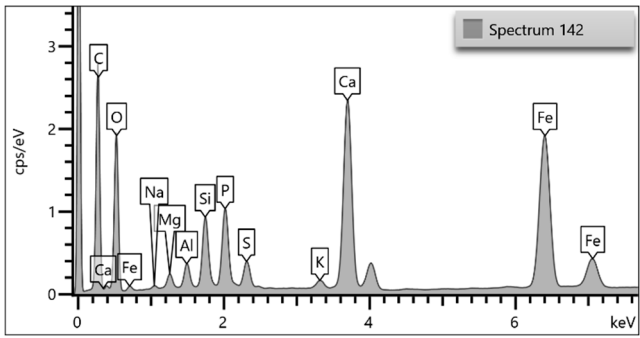

| Wt%     | C    | O     | Na   | Mg   | Al   | Si | P    | S    | K    | Ca    | Mn | Fe    | Total |
|---------|------|-------|------|------|------|----|------|------|------|-------|----|-------|-------|
| Sp. 142 | 1,09 | 25,96 | 0,41 | 1,12 | 1,58 | 4  | 5,11 | 1,74 | 0,65 | 17,12 |    | 41,21 | 100   |

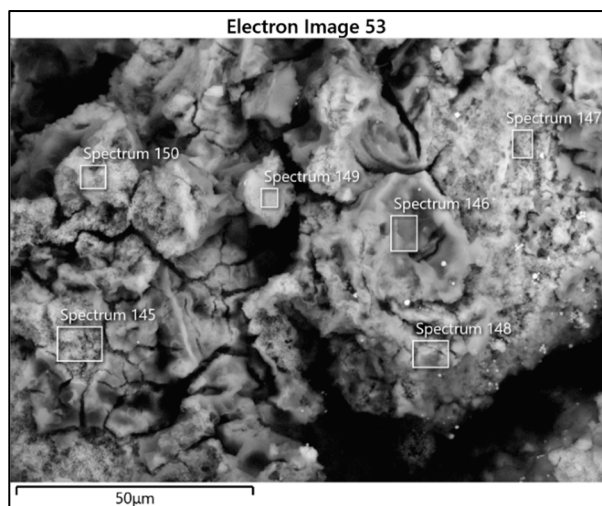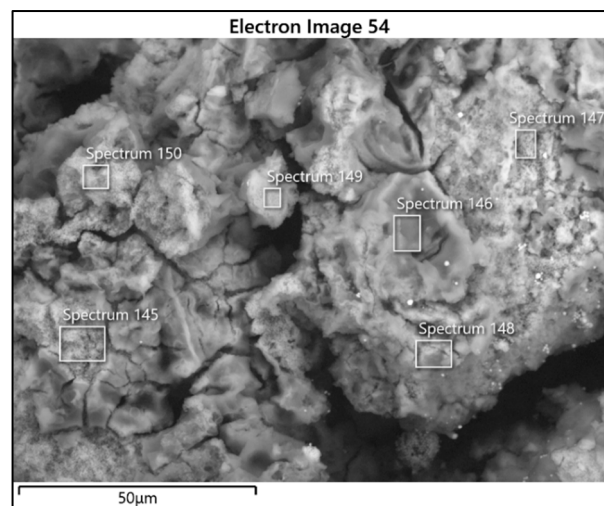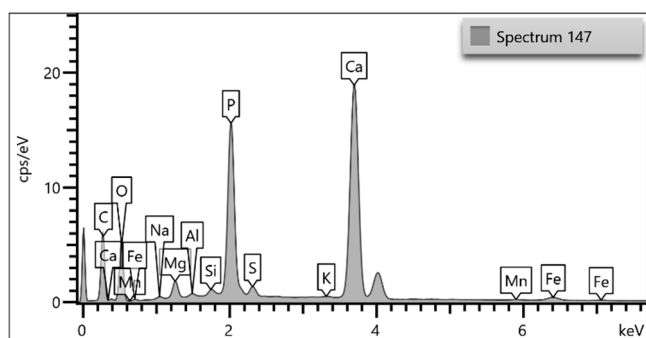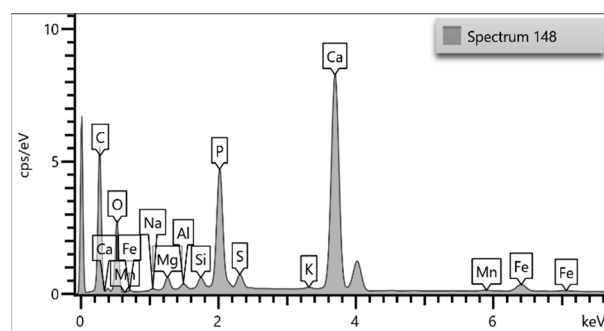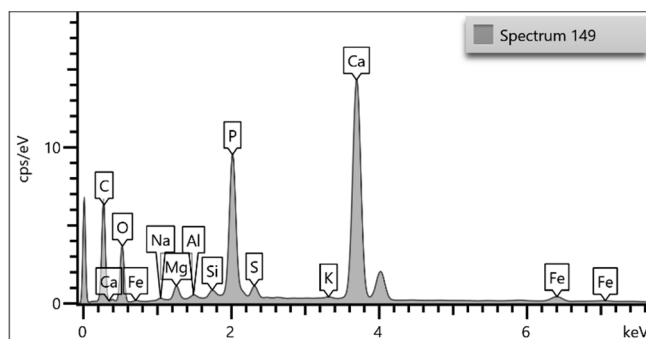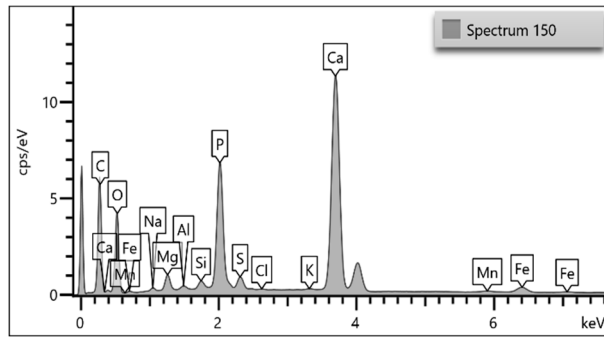

| Wt%     | C     | O     | Na   | Mg   | Al   | Si   | P     | S    | Cl   | K    | Ca    | Mn   | Fe   | Total |
|---------|-------|-------|------|------|------|------|-------|------|------|------|-------|------|------|-------|
| Sp. 147 | 15,22 | 58,58 | 0,17 | 0,82 | 0,12 | 0,2  | 7,54  | 0,48 |      | 0,07 | 16,07 | 0,11 | 0,61 | 100   |
| Sp. 148 | 1,22  | 39,44 | 0,29 | 1,47 | 0,49 | 0,92 | 12,22 | 1,66 |      | 0,27 | 38,22 | 0,34 | 3,47 | 100   |
| Sp. 149 | 17,39 | 60,66 | 0,12 | 0,58 | 0,12 | 0,22 | 5,33  | 0,51 |      | 0,09 | 14,15 |      | 0,84 | 100   |
| Sp. 150 | 0,96  | 41,67 | 0,54 | 1,77 | 0,32 | 0,66 | 12,6  | 1,48 | 0,13 | 0,18 | 36,82 | 0,39 | 2,49 | 100   |

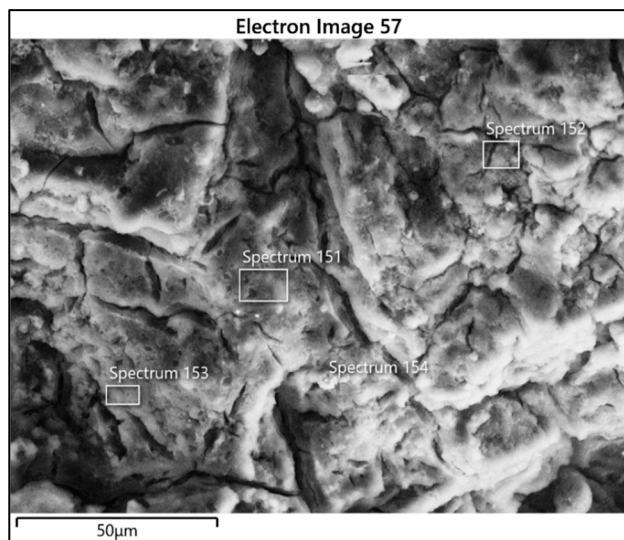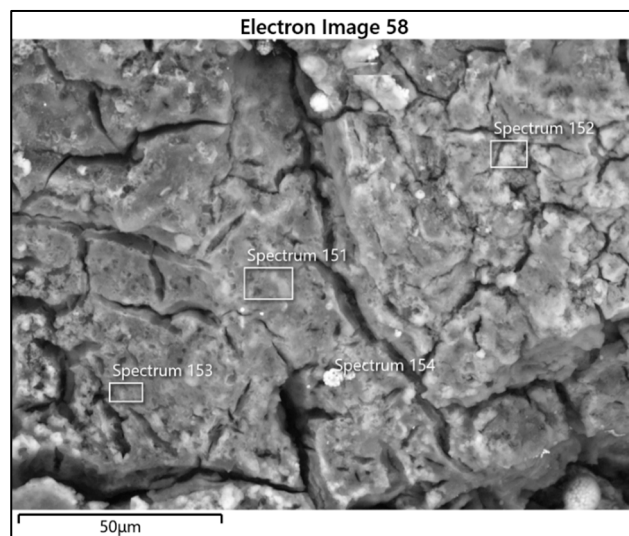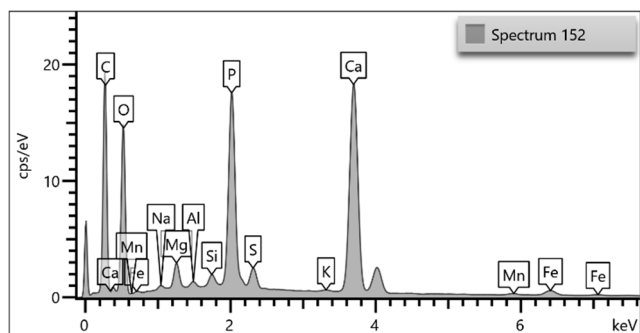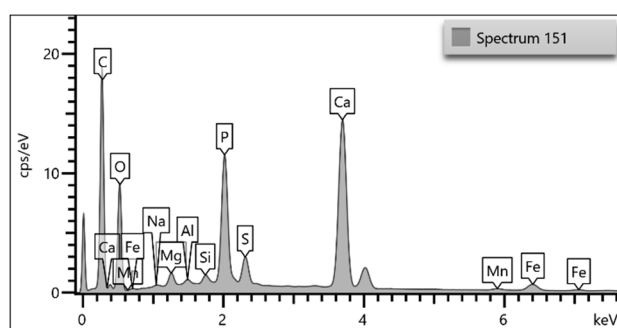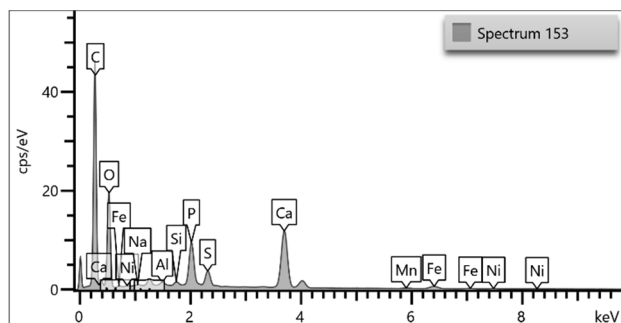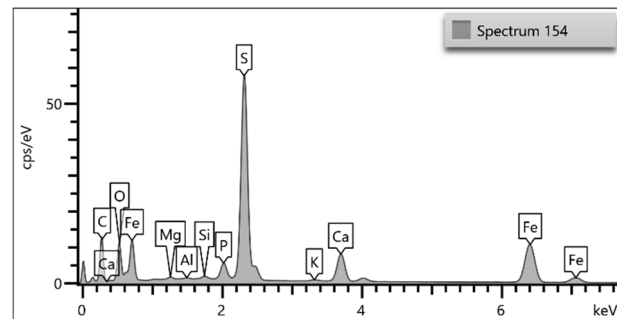

| Wt%     | C     | O     | Na   | Mg   | Al   | Si   | P     | S    | K    | Ca    | Mn   | Fe   | Ni   | Total |
|---------|-------|-------|------|------|------|------|-------|------|------|-------|------|------|------|-------|
| Sp. 151 | 21,22 | 65,72 | 0,06 | 0,36 | 0,11 | 0,18 | 3,31  | 0,77 |      | 7,33  | 0,16 | 0,8  |      | 100   |
| Sp. 152 | 1,45  | 50,35 | 0,42 | 2,06 | 0,4  | 0,71 | 14,26 | 1,77 | 0,14 | 26,25 | 0,43 | 1,76 |      | 100   |
| Sp. 153 | 3,21  | 59,89 | 0,25 | 1,47 | 0,51 | 0,62 | 8,53  | 3,34 |      | 18,89 | 0,5  | 2,36 | 0,43 | 100   |
| Sp. 154 | 15,44 | 61,43 |      | 0,12 | 0,06 | 0,1  | 0,77  | 10,3 | 0,09 | 2,29  |      | 9,39 |      | 100   |

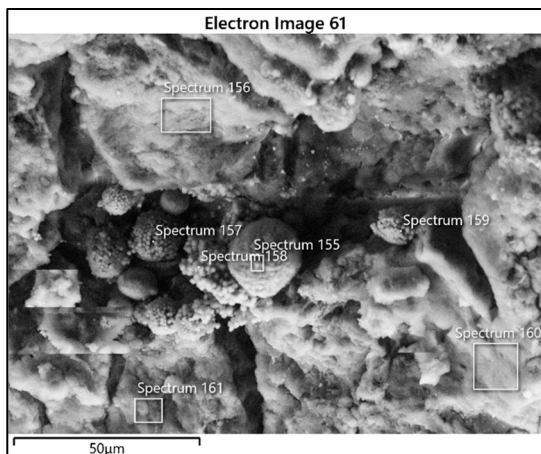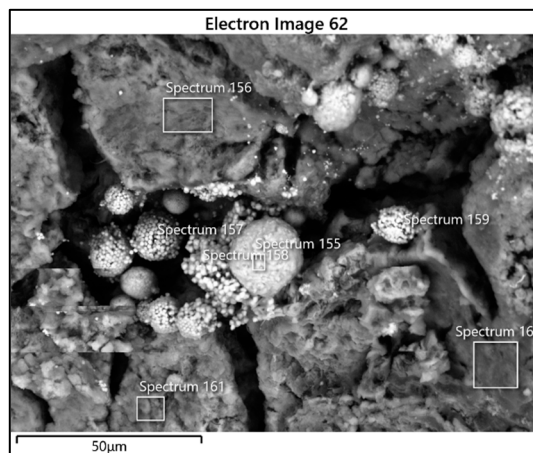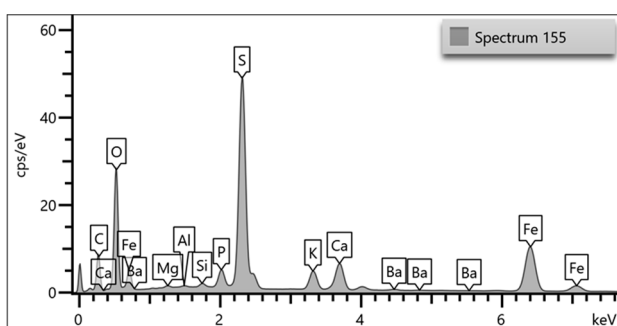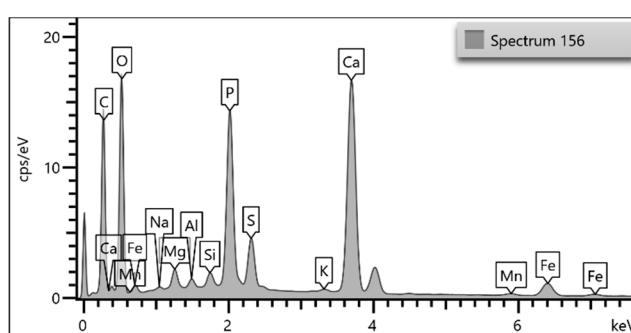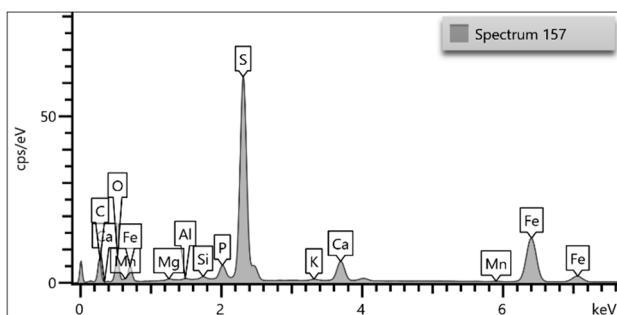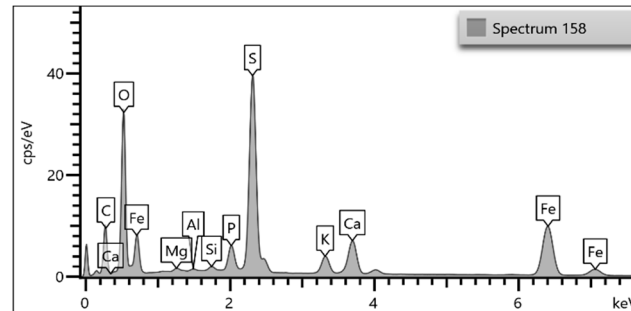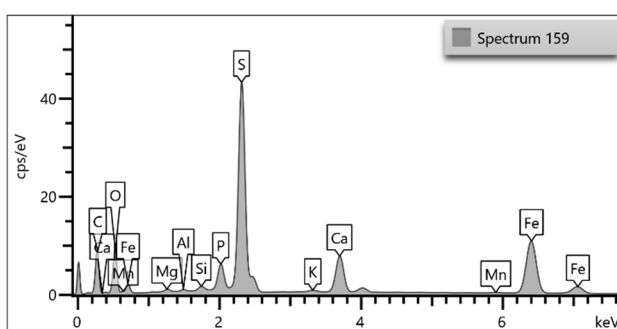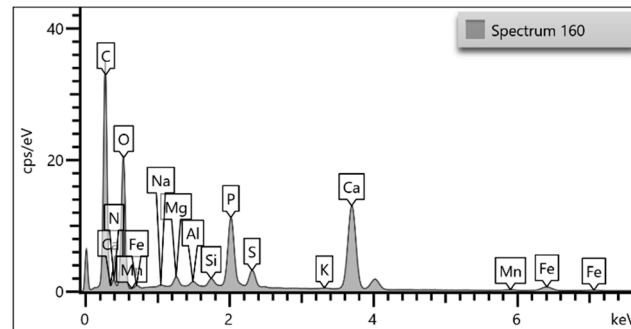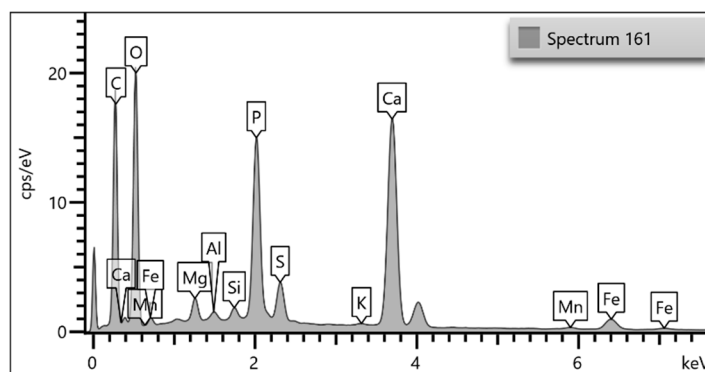

| Wt%     | C     | N    | O     | Na   | Mg   | Al   | Si   | P     | S     | K    | Ca    | Mn   | Fe    | Ba   | Total |
|---------|-------|------|-------|------|------|------|------|-------|-------|------|-------|------|-------|------|-------|
| Sp. 155 | 0,58  |      | 37,7  |      | 0,29 | 0,15 | 0,38 | 2,01  | 24,92 | 3,37 | 5,24  |      | 24,73 | 0,64 | 100   |
| Sp. 156 | 1,05  |      | 52,55 | 0,32 | 1,34 | 0,57 | 0,77 | 11,45 | 3,72  | 0,25 | 23,52 | 0,46 | 4     |      | 100   |
| Sp. 157 | 0,8   |      | 15,03 |      | 0,32 | 0,24 | 0,41 | 2,37  | 37,32 | 0,4  | 6,1   | 0,28 | 36,74 |      | 100   |
| Sp. 158 | 14,7  |      | 59,44 |      | 0,16 | 0,1  | 0,16 | 1,16  | 9,31  | 1,19 | 2,57  |      | 11,22 |      | 100   |
| Sp. 159 | 1,05  |      | 20,08 |      | 0,42 | 0,27 | 0,48 | 3,61  | 30,38 | 0,34 | 8,65  | 0,31 | 34,4  |      | 100   |
| Sp. 160 | 2,05  | 7,66 | 56,53 | 0,32 | 1,31 | 0,51 | 0,8  | 8,47  | 2,35  | 0,14 | 17,23 | 0,4  | 2,22  |      | 100   |
| Sp. 161 | 20,63 |      | 65,21 |      | 0,55 | 0,14 | 0,22 | 3,8   | 0,88  | 0,05 | 7,3   | 0,15 | 1,07  |      | 100   |



SAMPLE 8

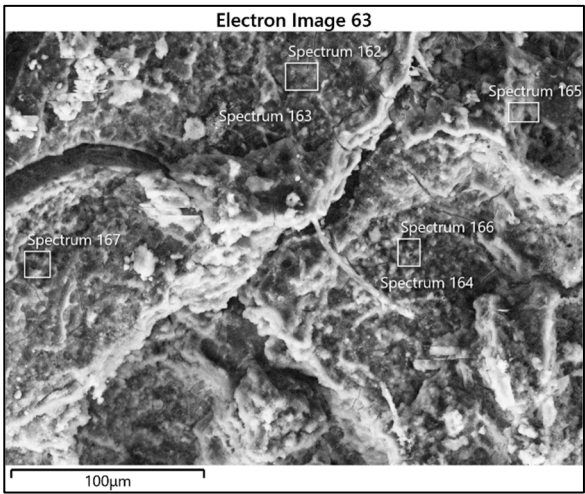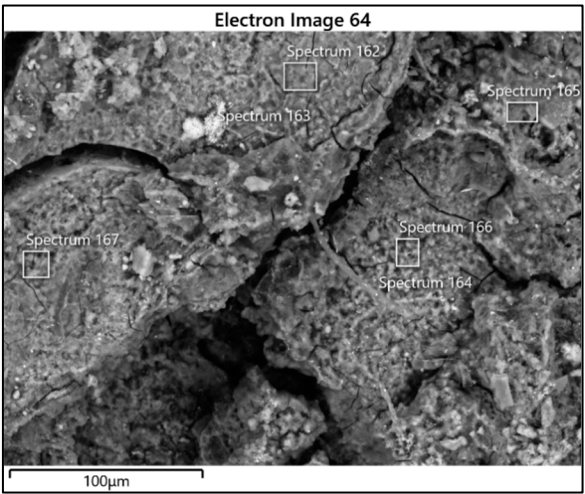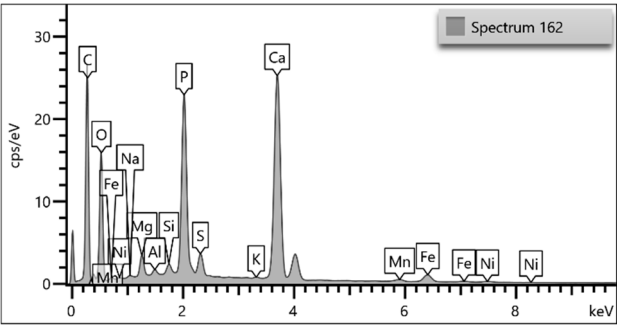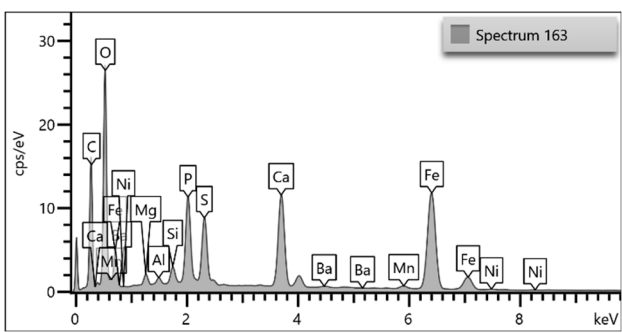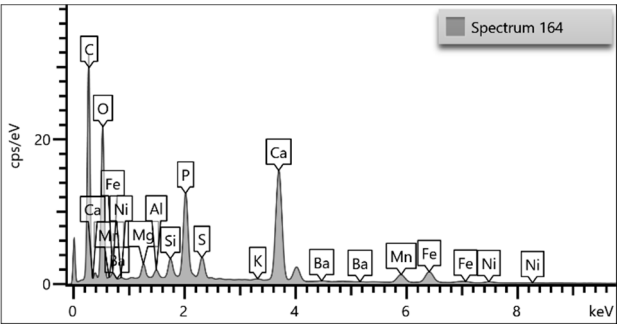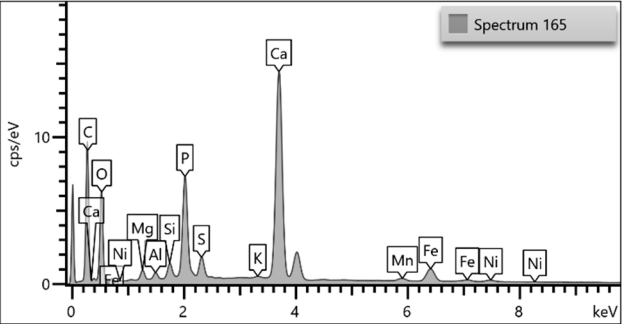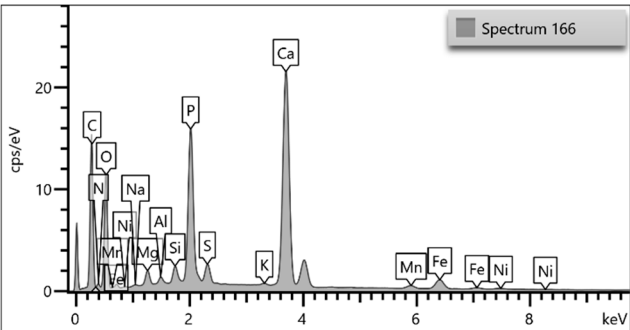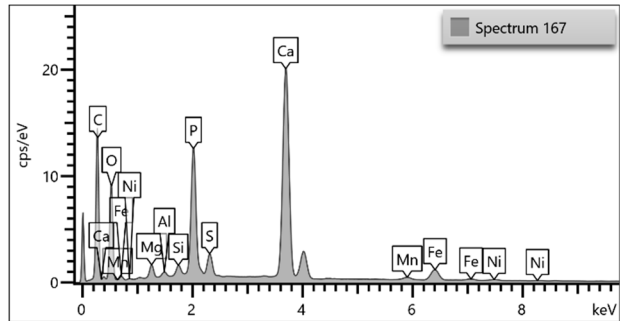

| Wt%     | C     | N    | O     | Na   | Mg   | Al   | Si   | P     | S    | K    | Ca    | Mn   | Fe    | Ni   | Ba   | Total |
|---------|-------|------|-------|------|------|------|------|-------|------|------|-------|------|-------|------|------|-------|
| Sp. 162 | 1,59  |      | 45,95 | 0,23 | 1,95 | 0,43 | 0,67 | 14,53 | 2,14 | 0,19 | 28,33 | 0,66 | 2,84  | 0,51 |      | 100   |
| Sp. 163 | 16,94 |      | 58,37 |      | 0,4  | 0,19 | 0,43 | 2,57  | 2,05 |      | 4,42  | 0,35 | 13,91 | 0,13 | 0,22 | 100   |
| Sp. 164 | 1,95  |      | 52,43 |      | 1,75 | 0,81 | 1,73 | 9,23  | 2,53 | 0,2  | 19,52 | 3,47 | 5,26  | 0,69 | 0,43 | 100   |
| Sp. 165 | 1,06  |      | 41,64 |      | 1,1  | 0,64 | 1,26 | 9,81  | 2,28 | 0,24 | 33,82 | 1,13 | 5,95  | 1,06 |      | 100   |
| Sp. 166 | 1,04  | 4,39 | 42,82 | 0,18 | 1,3  | 0,51 | 1,17 | 12,3  | 1,78 | 0,23 | 29,16 | 1,05 | 3,67  | 0,4  |      | 100   |
| Sp. 167 | 18,79 |      | 62,19 |      | 0,47 | 0,13 | 0,27 | 3,99  | 0,76 |      | 11,22 | 0,31 | 1,66  | 0,2  |      | 100   |

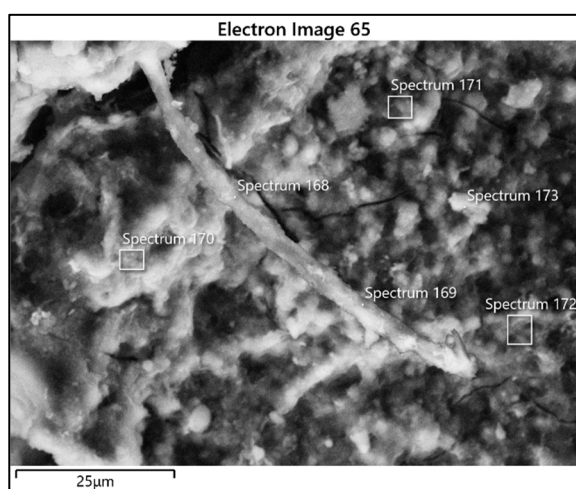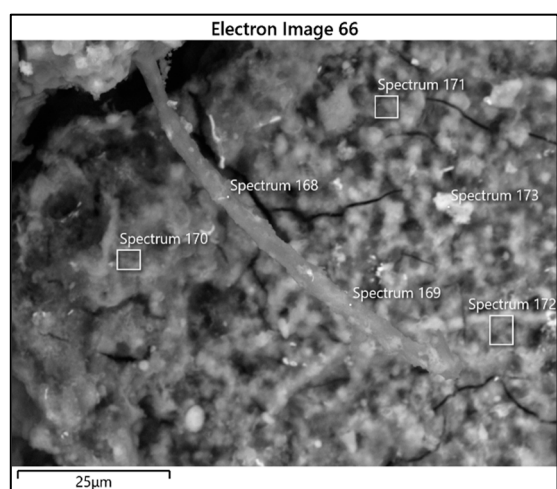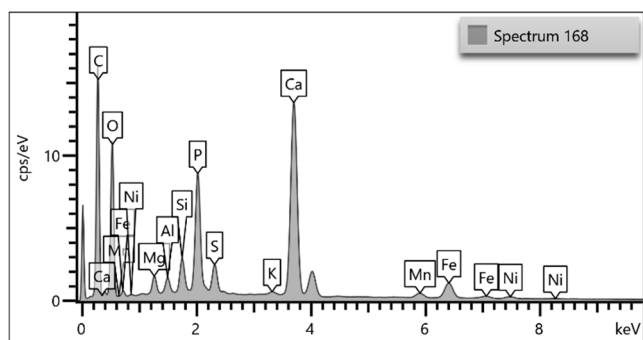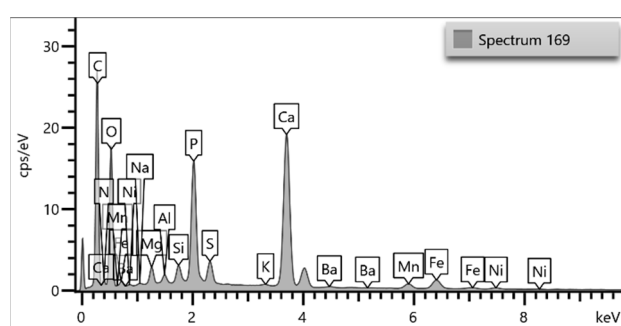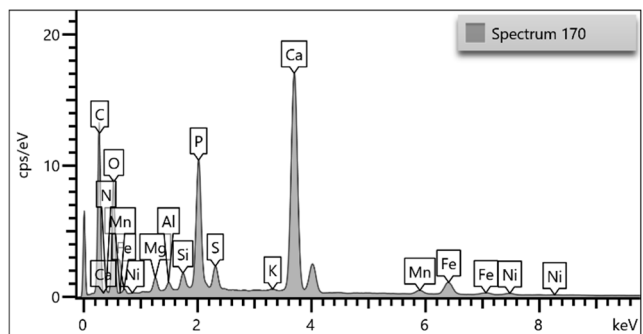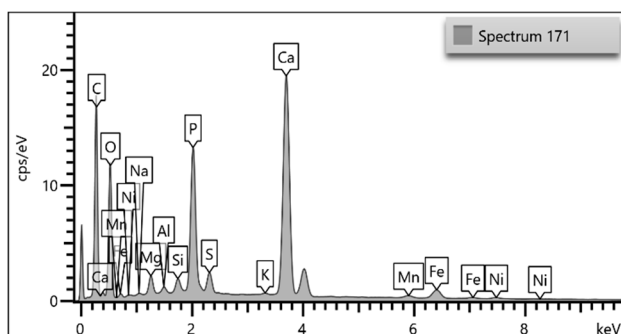

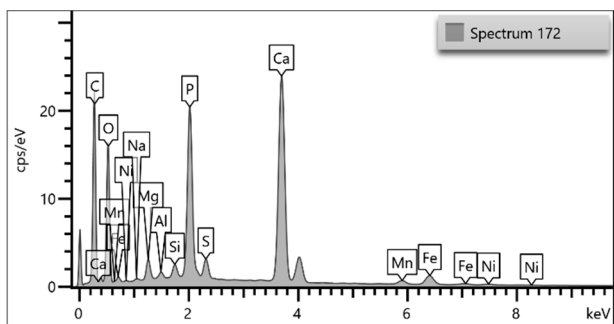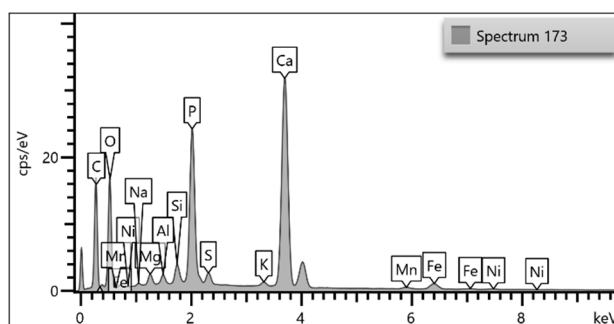

| Wt%     | C     | N    | O     | Na   | Mg   | Al   | Si   | P     | S    | K    | Ca    | Mn   | Fe   | Ni   | Ba   | Total |
|---------|-------|------|-------|------|------|------|------|-------|------|------|-------|------|------|------|------|-------|
| Sp. 168 | 1,53  |      | 47,12 |      | 1,64 | 1,15 | 2,35 | 9,59  | 2,58 | 0,31 | 25,39 | 1,55 | 5,68 | 1,1  |      | 100   |
| Sp. 169 | 1,53  | 6,25 | 47,09 | 0,22 | 1,66 | 0,67 | 1,26 | 10,53 | 2,13 | 0,14 | 21,94 | 1,76 | 3,49 | 0,76 | 0,56 | 100   |
| Sp. 170 | 1,11  | 4,43 | 42,32 |      | 1,27 | 0,63 | 1,13 | 10,37 | 2,11 | 0,2  | 29,56 | 1,3  | 4,72 | 0,85 |      | 100   |
| Sp. 171 | 1,34  |      | 46,99 | 0,27 | 1,69 | 0,47 | 0,9  | 11,69 | 1,92 | 0,19 | 29,85 | 0,77 | 3,26 | 0,66 |      | 100   |
| Sp. 172 | 19,56 |      | 63,62 | 0,08 | 0,6  | 0,15 | 0,3  | 4,41  | 0,55 |      | 9,06  | 0,41 | 1,11 | 0,16 |      | 100   |
| Sp. 173 | 0,83  |      | 45,37 | 0,33 | 1,05 | 0,77 | 1,42 | 13,63 | 1,2  | 0,56 | 31,51 | 0,6  | 2,34 | 0,39 |      | 100   |

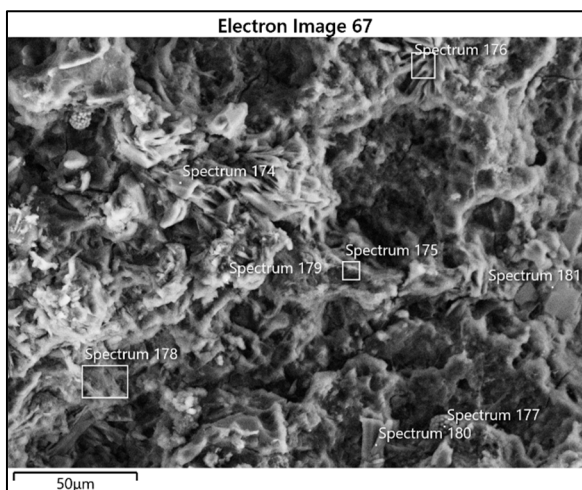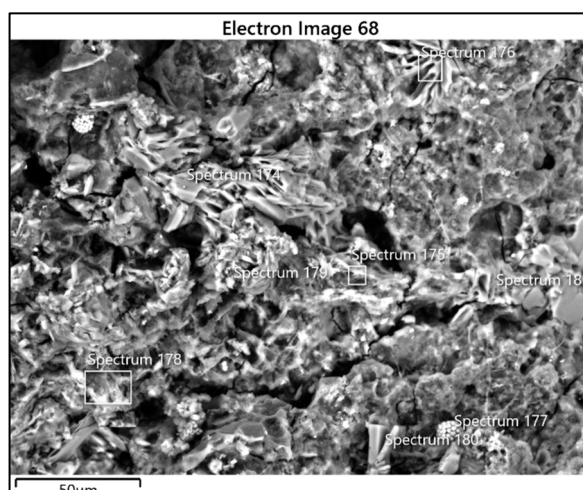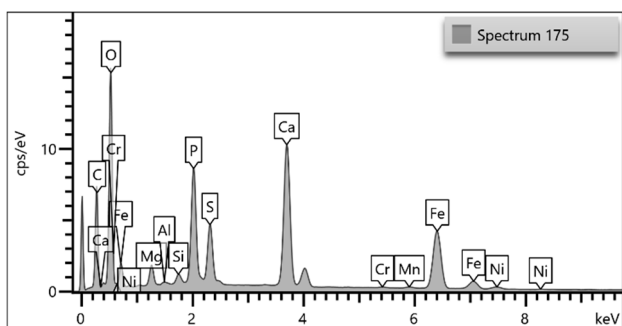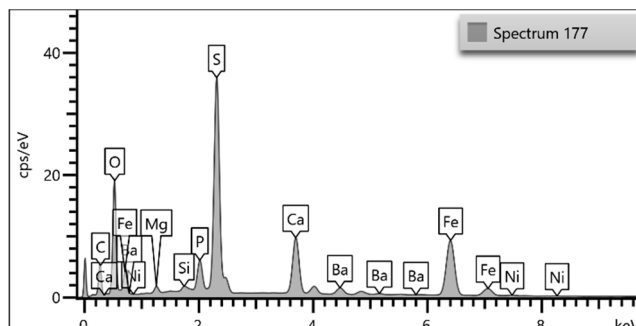

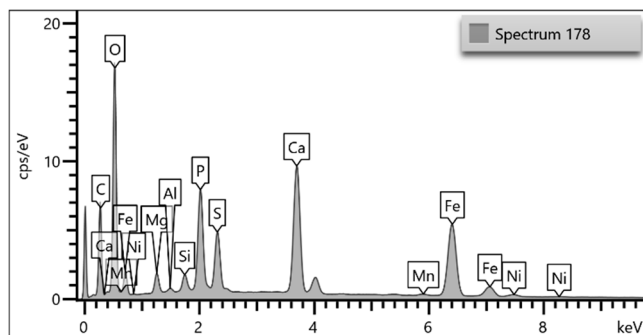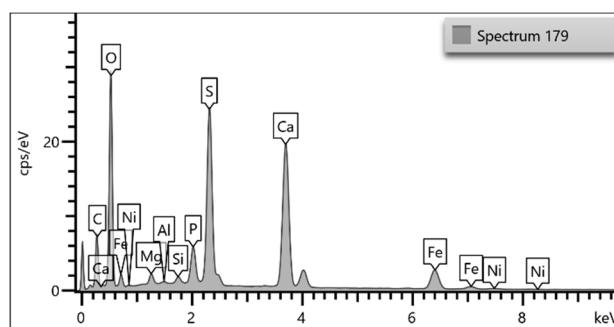

| Wt%     | C     | O     | Mg   | Al   | Si   | P    | S     | Ca    | Sc | Cr  | Mn   | Fe    | Ni   | Ba   | Total |
|---------|-------|-------|------|------|------|------|-------|-------|----|-----|------|-------|------|------|-------|
| Sp. 175 | 16,01 | 58,13 | 0,83 | 0,07 | 0,27 | 3,97 | 2,14  | 8,05  |    | 0,1 | 0,17 | 9,77  | 0,5  |      | 100   |
| Sp. 177 | 10,99 | 54,74 | 0,42 |      | 0,16 | 1,58 | 11,24 | 4,74  |    |     |      | 13,73 | 0,21 | 2,18 | 100   |
| Sp. 178 | 0,55  | 43,53 | 1,85 | 0,29 | 1,08 | 7,57 | 4,72  | 14,77 |    |     | 0,42 | 24,27 | 0,95 |      | 100   |
| Sp. 179 | 0,39  | 54,7  | 0,96 | 0,13 | 0,43 | 2,82 | 14,01 | 18,94 |    |     |      | 7,31  | 0,32 |      | 100   |

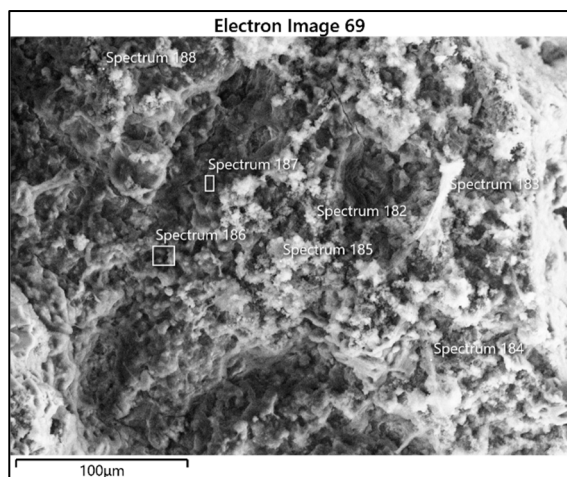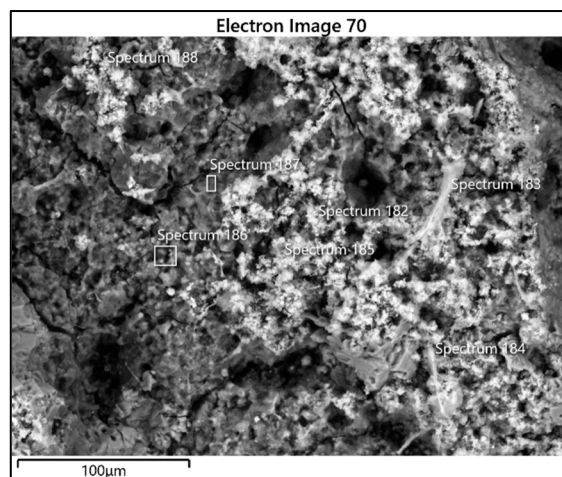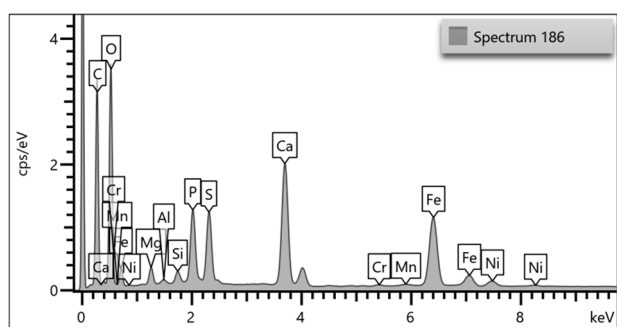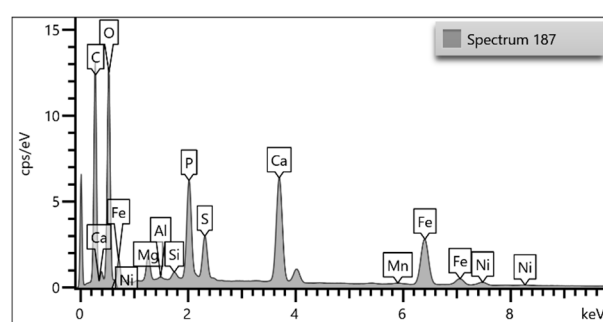

| Wt%     | C    | O     | Mg   | Al   | Si   | P    | S    | Ca    | Cr  | Mn   | Fe    | Ni   | Br | Total |
|---------|------|-------|------|------|------|------|------|-------|-----|------|-------|------|----|-------|
| Sp. 186 | 1,23 | 42,84 | 1,71 | 0,24 | 0,79 | 5,61 | 5,75 | 14,54 | 0,3 | 0,31 | 23,94 | 2,72 |    | 100   |
| Sp. 187 | 1,49 | 47,79 | 2,77 | 0,19 | 0,49 | 8,61 | 4,07 | 14,28 |     | 0,29 | 18,35 | 1,68 |    | 100   |



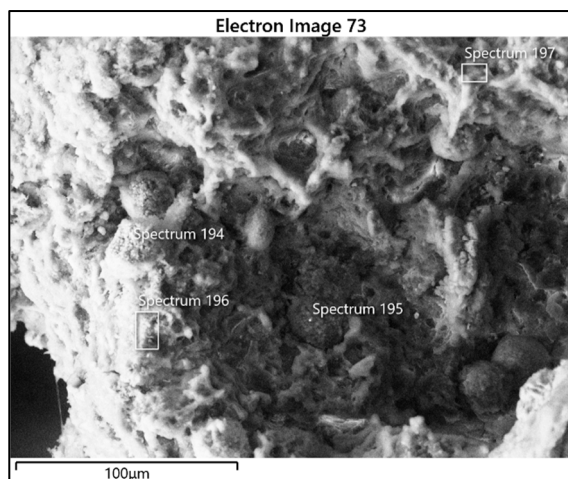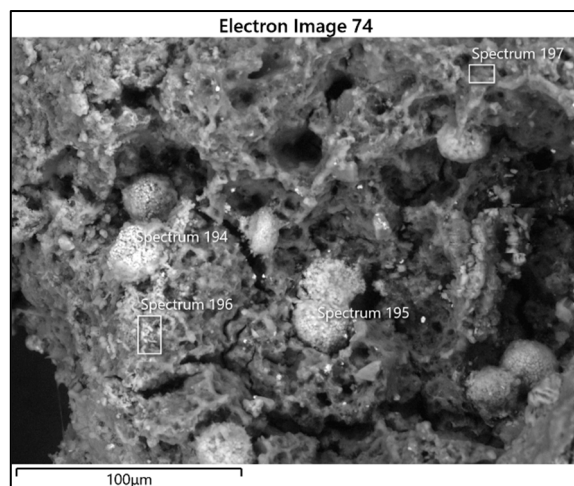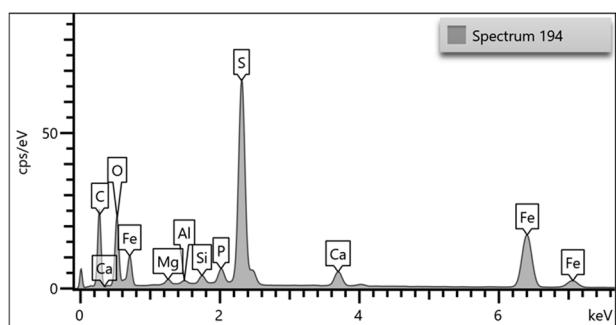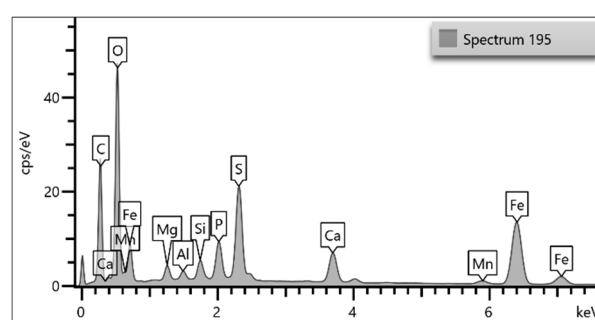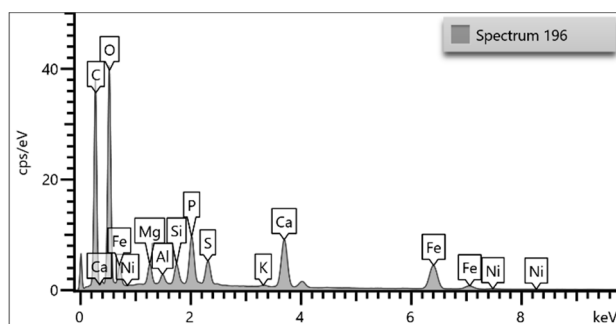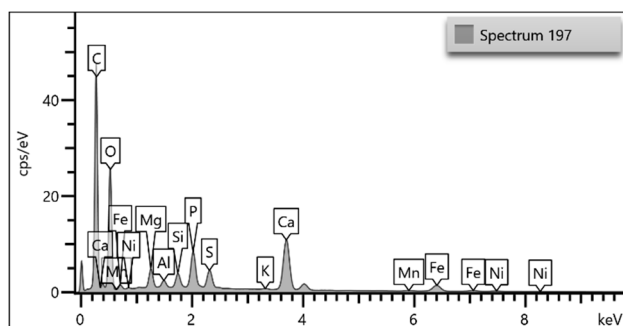

| Wt%     | C     | O     | Mg   | Al   | Si   | P    | S    | K    | Ca   | Mn   | Fe    | Ni   | Total |
|---------|-------|-------|------|------|------|------|------|------|------|------|-------|------|-------|
| Sp. 194 | 17,21 | 62,49 | 0,22 | 0,11 | 0,27 | 0,56 | 8,08 |      | 0,92 |      | 10,14 |      | 100   |
| Sp. 195 | 18,98 | 62,35 | 0,59 | 0,29 | 0,58 | 1,31 | 3,35 |      | 1,65 | 0,41 | 10,5  |      | 100   |
| Sp. 196 | 22,98 | 67,41 | 0,69 | 0,26 | 0,51 | 1,43 | 0,74 | 0,06 | 2,35 |      | 3,49  | 0,07 | 100   |
| Sp. 197 | 24,22 | 69,18 | 0,65 | 0,2  | 0,37 | 1,09 | 0,58 | 0,05 | 2,58 | 0,05 | 0,9   | 0,11 | 100   |

## SAMPLE 9

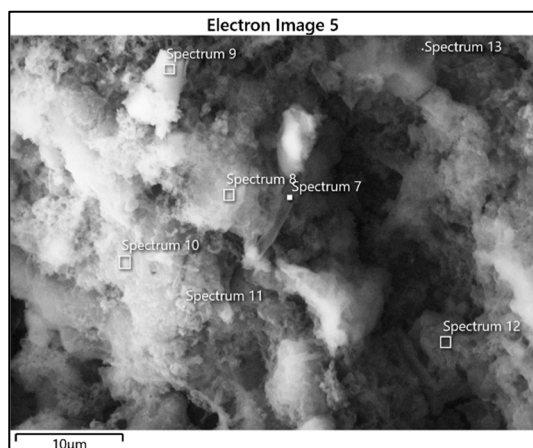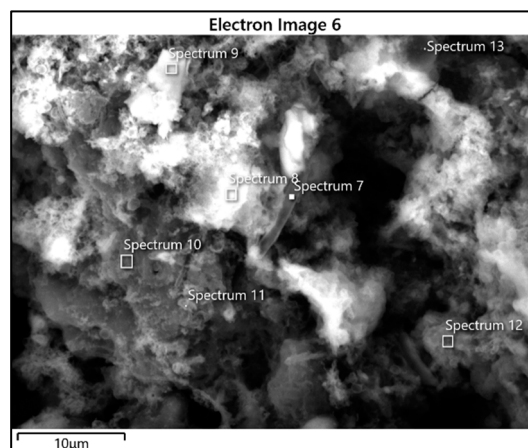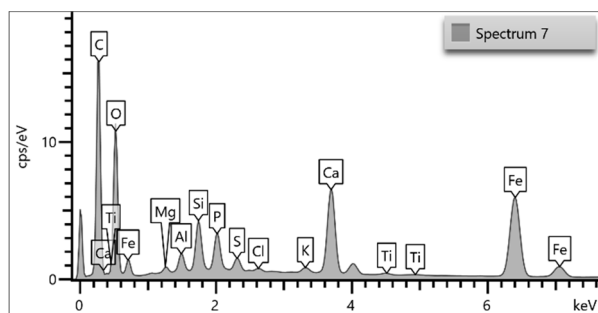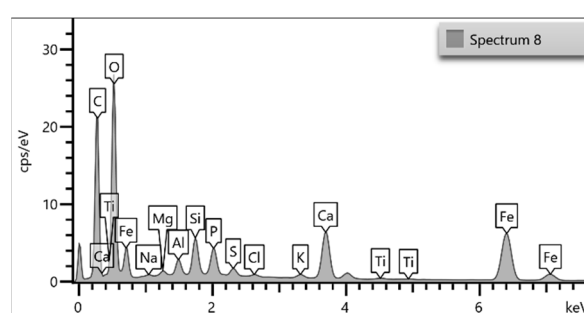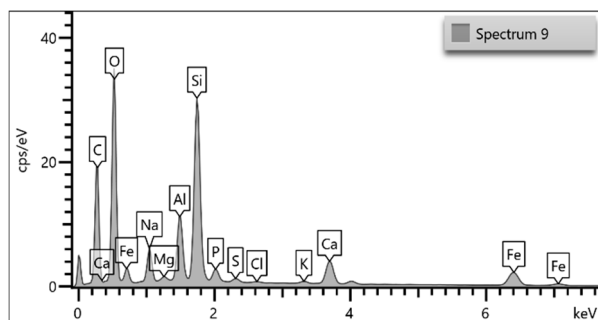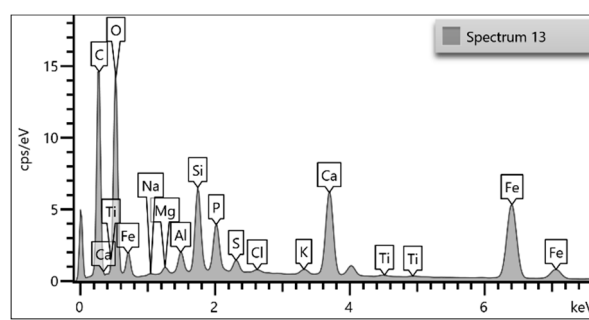

| Wt%    | C     | O     | Na   | Mg   | Al   | Si   | P    | S    | Cl   | K    | Ca   | Ti   | Fe   | Total |
|--------|-------|-------|------|------|------|------|------|------|------|------|------|------|------|-------|
| Sp. 7  | 21,13 | 63,51 |      | 0,16 | 0,42 | 1,04 | 0,89 | 0,32 | 0,09 | 0,17 | 3,18 | 0,08 | 9,03 | 100   |
| Sp. 8  | 21,86 | 64,83 | 0,08 | 0,16 | 0,5  | 1,08 | 0,91 | 0,25 | 0,07 | 0,16 | 2,46 | 0,07 | 7,56 | 100   |
| Sp. 9  | 37,81 | 39,55 | 2,34 | 0,23 | 3,3  | 9,23 | 0,84 | 0,25 | 0,07 | 0,17 | 2,07 |      | 4,14 | 100   |
| Sp. 13 | 20,83 | 63,62 | 0,06 | 0,18 | 0,46 | 1,73 | 1,12 | 0,3  | 0,07 | 0,16 | 3,08 | 0,07 | 8,31 | 100   |

## SAMPLE 10

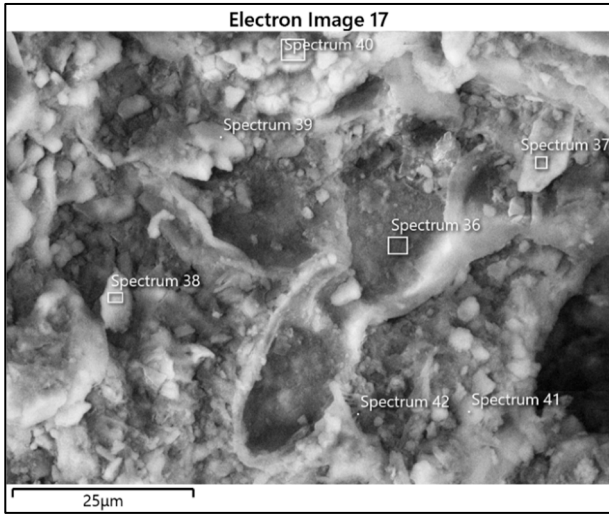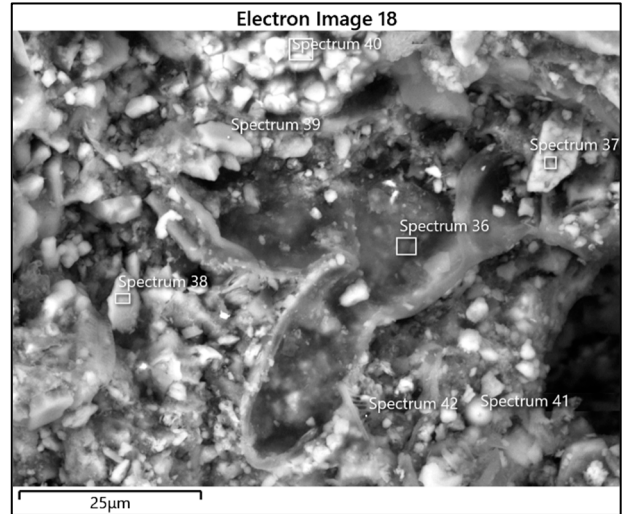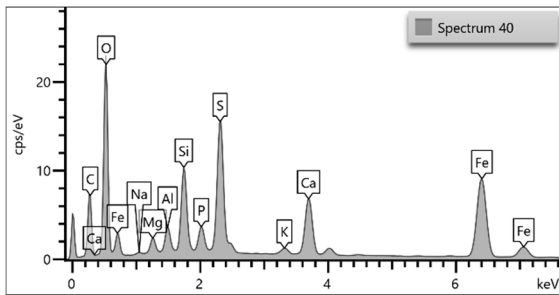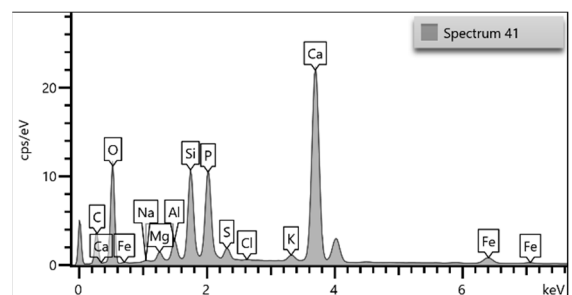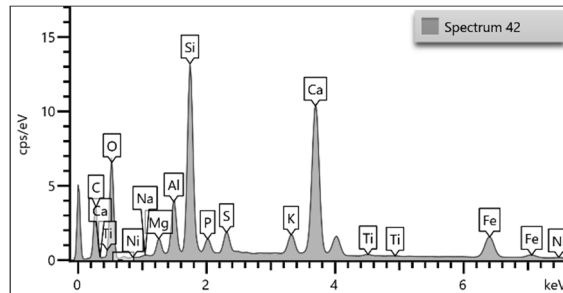

| Wt%    | C     | O     | Na   | Mg   | Al   | Si   | P    | S    | Cl   | K    | Ca    | Ti   | Fe    | Ni   | Total |
|--------|-------|-------|------|------|------|------|------|------|------|------|-------|------|-------|------|-------|
| Sp. 40 | 14,47 | 57,34 | 0,12 | 0,63 | 0,91 | 2,81 | 0,97 | 5,13 |      | 0,29 | 3,36  |      | 13,98 |      | 100   |
| Sp. 41 | 11,49 | 54    | 0,11 | 0,56 | 1,1  | 4,7  | 5,52 | 0,78 | 0,08 | 0,5  | 19,47 |      | 1,67  |      | 100   |
| Sp. 42 | 13,7  | 56,44 | 0,1  | 0,8  | 2,29 | 7,63 | 0,72 | 1,04 |      | 1,26 | 11,17 | 0,17 | 4,5   | 0,18 | 100   |

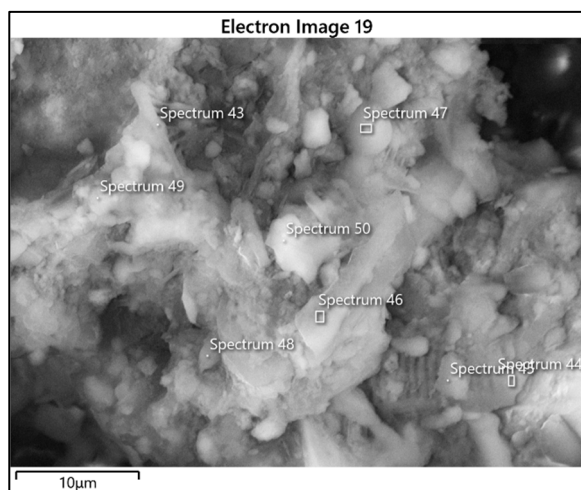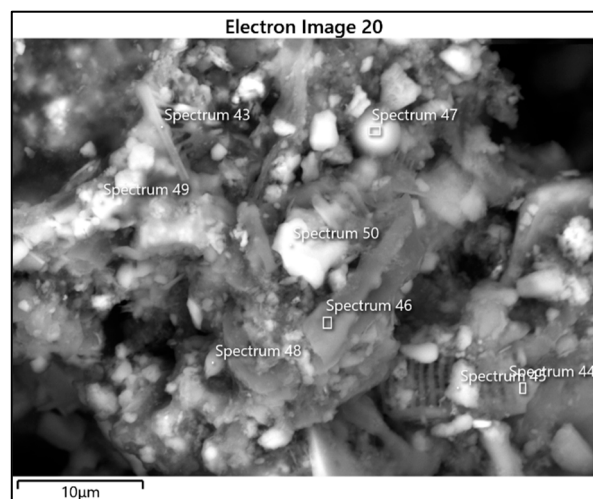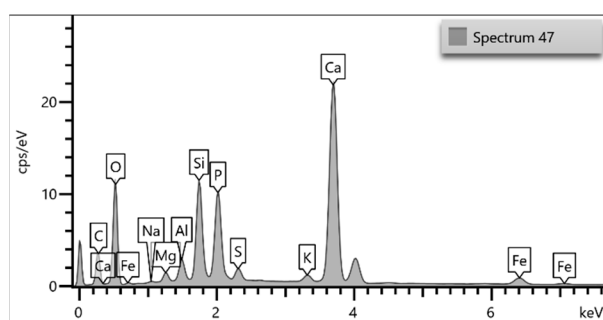

| Wt%    | C    | O    | Na   | Mg   | Al   | Si  | P   | S    | K    | Ca    | Ti | Fe   | Ni | Total |
|--------|------|------|------|------|------|-----|-----|------|------|-------|----|------|----|-------|
| Sp. 47 | 11,2 | 53,7 | 0,13 | 0,59 | 1,14 | 5,1 | 5,4 | 0,79 | 0,58 | 19,51 |    | 1,86 |    | 100   |

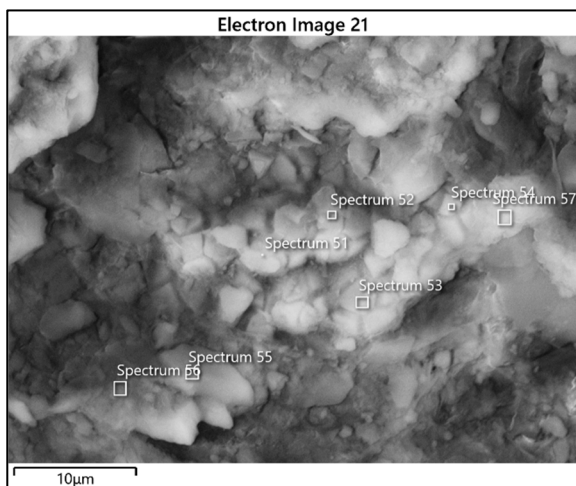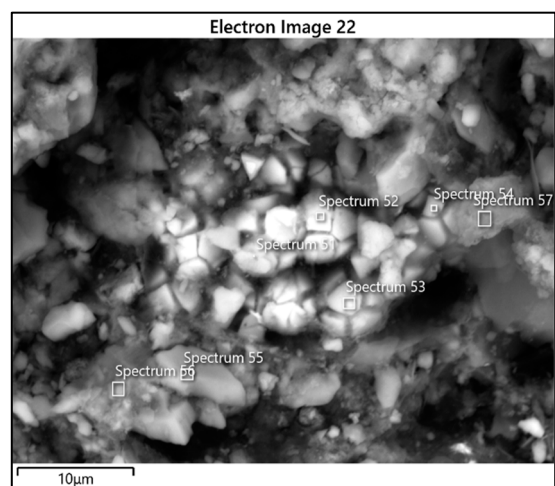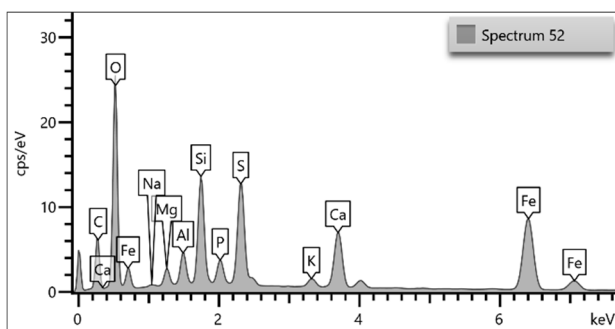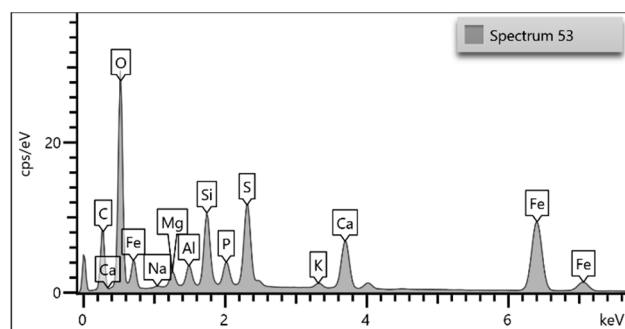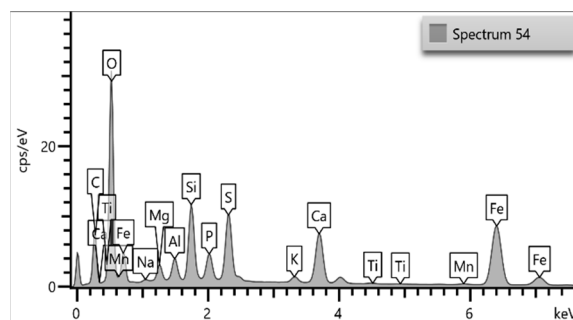

| Wt%    | C     | O     | Na   | Mg   | Al   | Si   | P    | S    | K    | Ca   | Ti   | Mn   | Fe    | Ni | Total |
|--------|-------|-------|------|------|------|------|------|------|------|------|------|------|-------|----|-------|
| Sp. 52 | 13,52 | 56,19 | 0,11 | 0,82 | 1,32 | 4,08 | 1,07 | 4,5  | 0,48 | 3,74 |      |      | 14,16 |    | 100   |
| Sp. 53 | 15,14 | 57,45 | 0,12 | 0,74 | 0,89 | 2,85 | 1,09 | 3,77 | 0,31 | 3,32 |      |      | 14,32 |    | 100   |
| Sp. 54 | 14,58 | 56,83 | 0,17 | 0,92 | 1,04 | 3,35 | 1,34 | 3,45 | 0,4  | 3,9  | 0,07 | 0,16 | 13,8  |    | 100   |



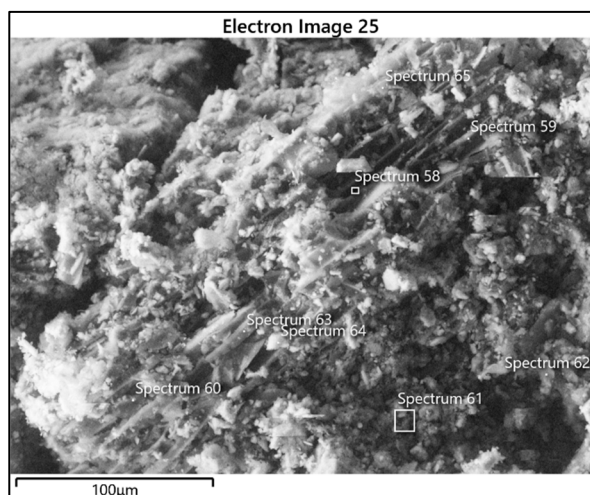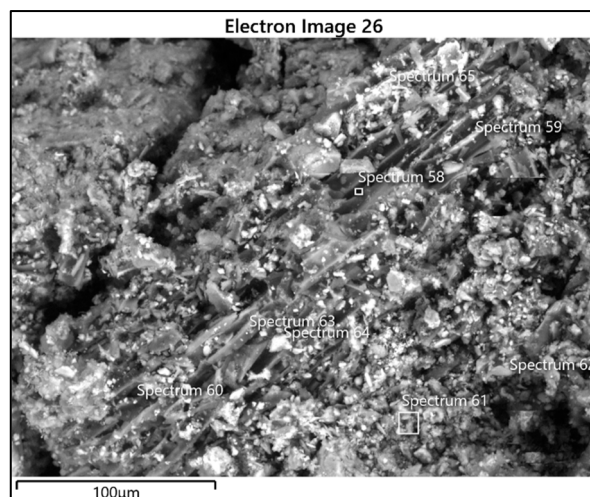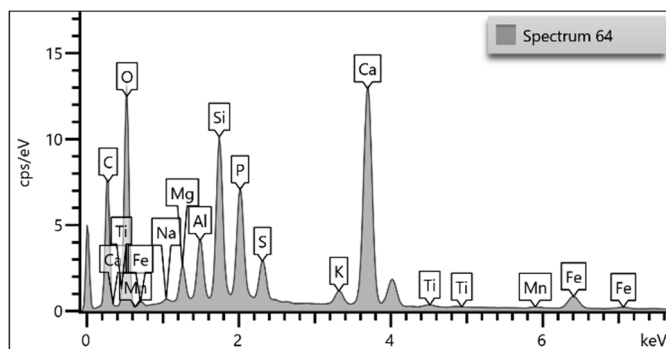

| Wt%    | C     | O     | Na   | Mg   | Al   | Si   | P    | S    | K    | Ca   | Ti   | Mn   | Fe   | Total |
|--------|-------|-------|------|------|------|------|------|------|------|------|------|------|------|-------|
| Sp. 64 | 29,83 | 36,69 | 0,16 | 1,39 | 2,11 | 5,53 | 4,78 | 1,94 | 0,73 | 13,7 | 0,23 | 0,24 | 2,68 | 100   |

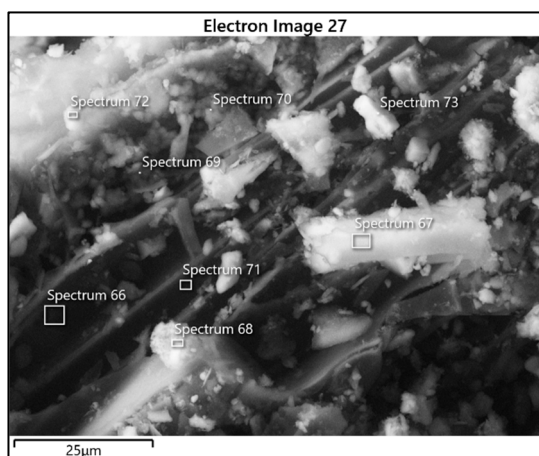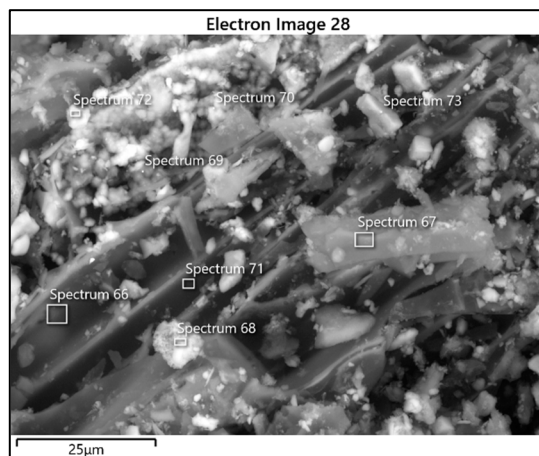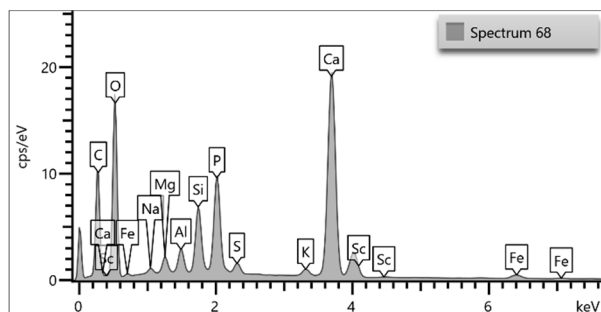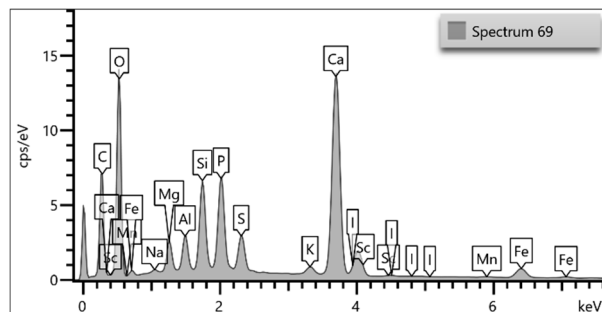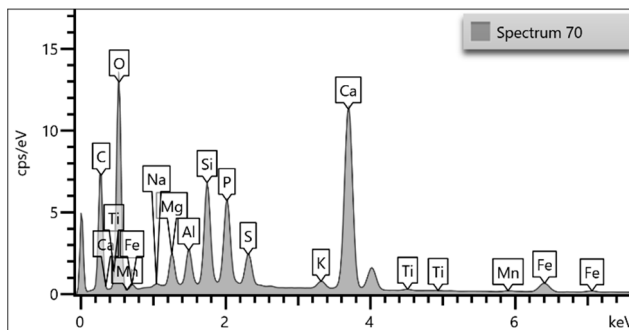

| Wt%    | C     | O     | Na   | Mg   | Al   | Si   | P    | S    | K    | Ca    | Sc   | Ti   | Mn   | Fe   | Ni | I    | Total |
|--------|-------|-------|------|------|------|------|------|------|------|-------|------|------|------|------|----|------|-------|
| Sp. 68 | 27,33 | 42,15 | 0,35 | 0,84 | 1,14 | 3,01 | 5,5  | 0,66 | 0,5  | 17,27 | 0,15 |      |      | 1,1  |    |      | 100   |
| Sp. 69 | 16,87 | 60,55 | 0,14 | 1,08 | 1,12 | 2,57 | 3,13 | 1,28 | 0,33 | 10,87 | 0,2  |      | 0,09 | 1,45 |    | 0,31 | 100   |
| Sp. 70 | 29,5  | 40,66 | 0,16 | 1,53 | 1,48 | 4,12 | 4,28 | 1,74 | 0,47 | 13,37 |      | 0,18 | 0,18 | 2,33 |    |      | 100   |
